# Supplementary material for: Palmitoylation regulates neuropilin-2 localization and function in cortical neurons and conveys specificity to semaphorin signaling via palmitoyl acyltransferases
Source: eLife journal article supplement (doi:10.7554/elife.83217), 2023-03-15

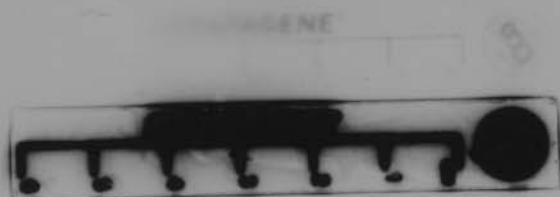

5-11-11  
EXPOSURE: ECL PLUS 1'

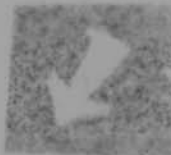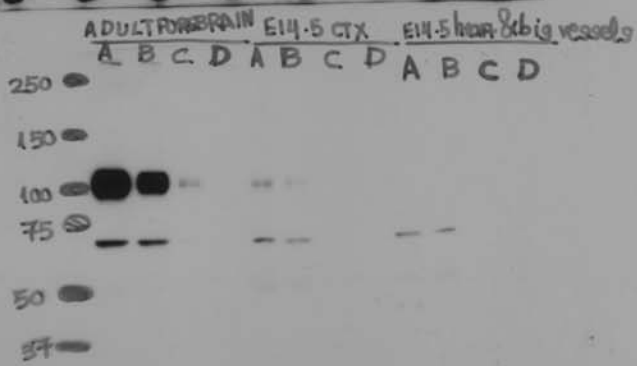

SAPI02.1B

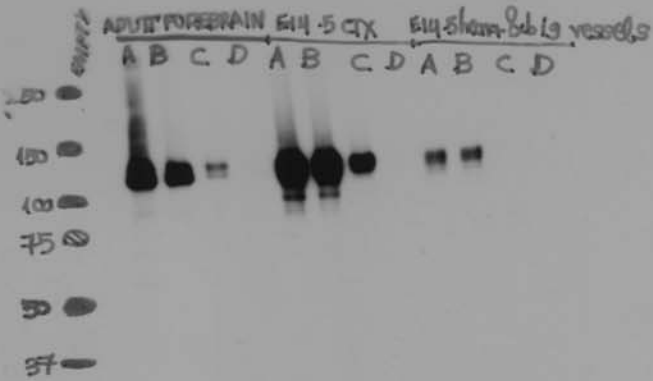

Nrp2.1B

16 µl. sample / lane

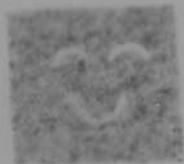

Supplement: fig2-data1 [file elife-83217-fig2-data1-v1.pdf]
