# Supplementary material for: Palmitoylation regulates neuropilin-2 localization and function in cortical neurons and conveys specificity to semaphorin signaling via palmitoyl acyltransferases
Source: eLife journal article supplement (doi:10.7554/elife.83217), 2023-03-15
Supplement: fig2-data2 [file elife-83217-fig2-data2-v1.pdf]

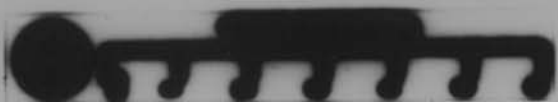

7-7-11 5th ABE Exposure: ECL 5'  
AcyL-Biotin Exchange in vivo from  
adult mouse forebrain, E14.5 mouse ~~forebrain~~ cortex  
and E14.5 heart and big vessels.

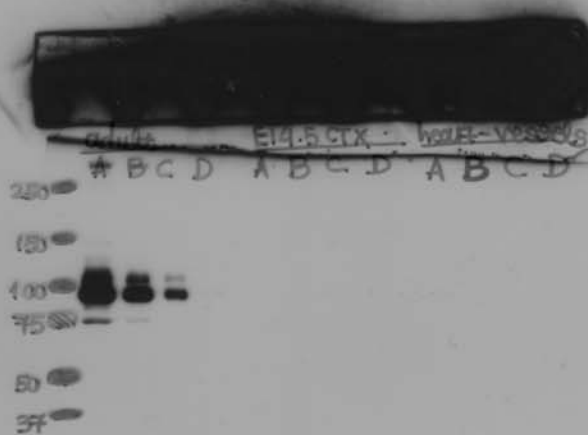

PSD-95 IB:  $\alpha$ -PSD-95 Ab, mouse, Millipore.  
blocking: 5% milk, 1hr at RT  
1° Ab: 1:2000 in 5% milk/TBS-T dN, 4°C  
2° Ab: 1:10000 in 1% milk, 1hr, RT

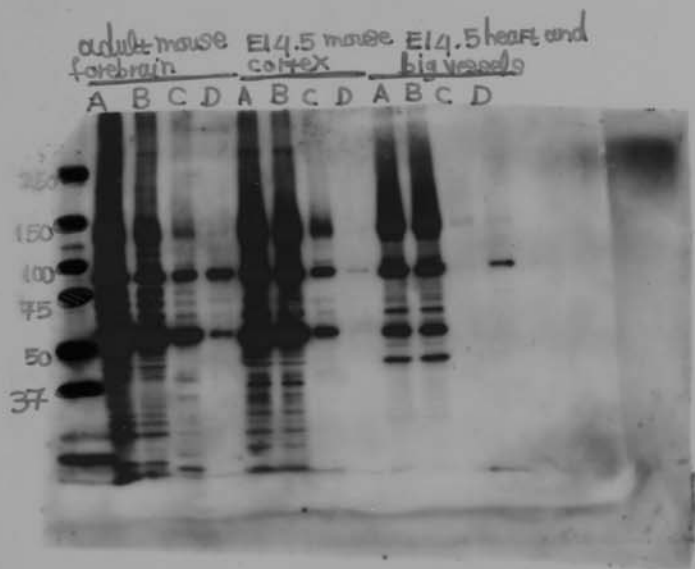

Nrp1 IB:  $\alpha$ -Nrp1 Ab, goat (R & D)  
blocking: 3% BSA in TBS-T for 1hr at RT  
1° Ab: 1:1000 in 3% BSA/TBS-T dN at 4°C  
2° Ab:  $\alpha$ -goat HRP-conjugated 2° Ab  
1:10000 in 1% milk, 1hr at RT
