# Supplementary material for: Palmitoylation regulates neuropilin-2 localization and function in cortical neurons and conveys specificity to semaphorin signaling via palmitoyl acyltransferases
Source: eLife journal article supplement (doi:10.7554/elife.83217), 2023-03-15

7-11-11

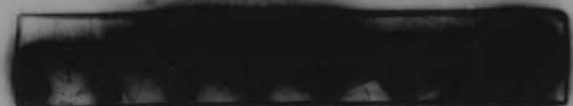

5th ABE  
ECL 14'

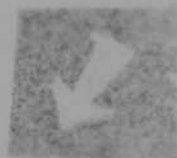

250 ●  
150 ●  
100 ●  
75 ●  
●  
●

SAP102 IB

|       | ADULT |   |   |   | E14.5 |   |   |   | HEART |   |   |   |
|-------|-------|---|---|---|-------|---|---|---|-------|---|---|---|
|       | A     | B | C | D | A     | B | C | D | A     | B | C | D |
| 250 ● |       |   |   |   |       |   |   |   |       |   |   |   |
| 150 ● |       |   |   |   |       |   |   |   |       |   |   |   |
| 100 ● |       |   |   |   |       |   |   |   |       |   |   |   |
| 75 ●  |       |   |   |   |       |   |   |   |       |   |   |   |
| 50 ●  |       |   |   |   |       |   |   |   |       |   |   |   |
| 37 ●  |       |   |   |   |       |   |   |   |       |   |   |   |

Nrp2 IB

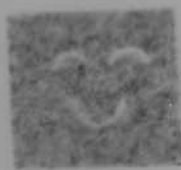

Supplement: fig2-data3 [file elife-83217-fig2-data3-v1.pdf]
