# Supplementary material for: Palmitoylation regulates neuropilin-2 localization and function in cortical neurons and conveys specificity to semaphorin signaling via palmitoyl acyltransferases
Source: eLife journal article supplement (doi:10.7554/elife.83217), 2023-03-15

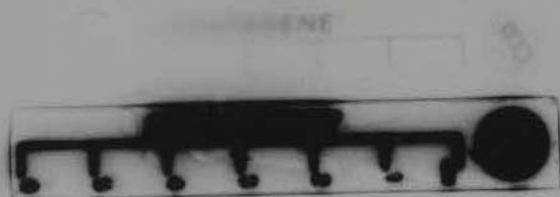

5-HABE 7-11-11  
Exposure: ECL Plus 1'

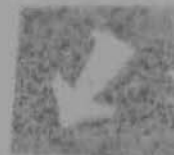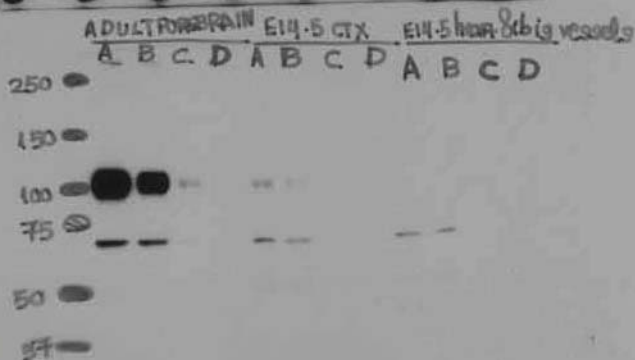

SAPI02.1B

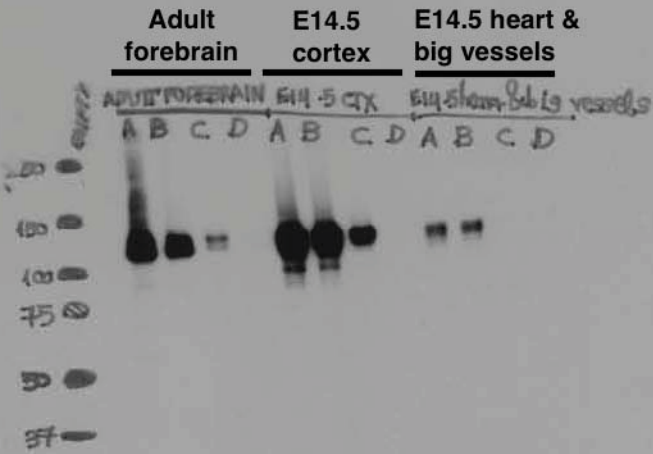

Acyl-Biotin Exchange (ABE) on mouse tissue

Nrp-2 immunoblot

Nrp2.1B

- A: Input +HA
- B: Input -HA
- C: +HA
- D: -HA

16 µl sample / lane

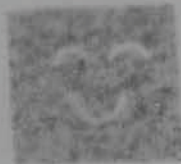

Supplement: fig2-data4 [file elife-83217-fig2-data4-v1.pdf]
