# Supplementary material for: Palmitoylation regulates neuropilin-2 localization and function in cortical neurons and conveys specificity to semaphorin signaling via palmitoyl acyltransferases
Source: eLife journal article supplement (doi:10.7554/elife.83217), 2023-03-15

7-11-11

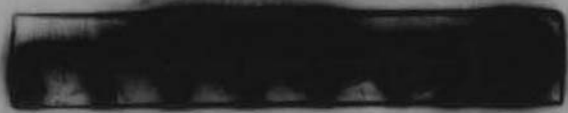

5th ABE  
ECL 14'

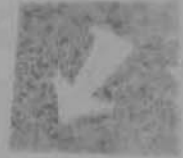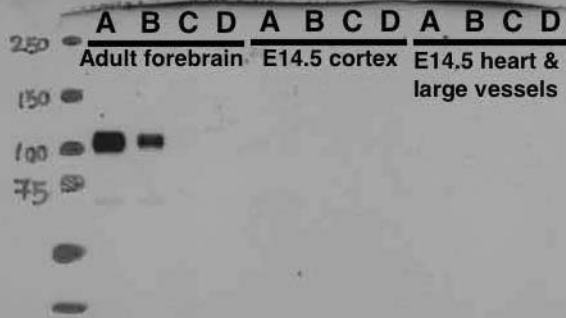

SAP102 immunoblot  
SAP102 IB

A: Input +HA  
B: Input -HA  
C: +HA  
D: -HA

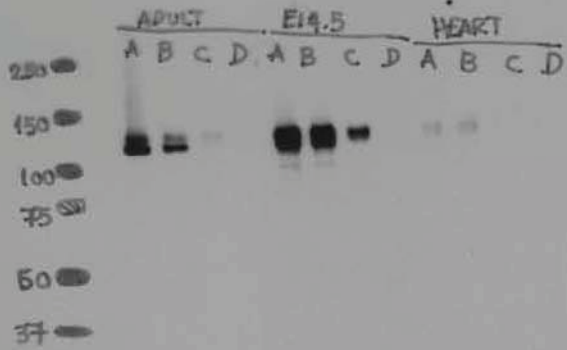

Nrp2 IB

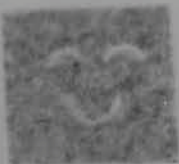

Supplement: fig2-data6 [file elife-83217-fig2-data6-v1.pdf]
