# Supplementary material for: Palmitoylation regulates neuropilin-2 localization and function in cortical neurons and conveys specificity to semaphorin signaling via palmitoyl acyltransferases
Source: eLife journal article supplement (doi:10.7554/elife.83217), 2023-03-15
Supplement: fig2-data11 [file elife-83217-fig2-data11-v1.pdf]

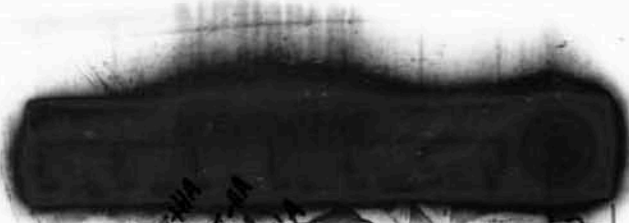

**ABE on deep layer primary cortical neurons**

3rd ABE 5-7-11 Exposure ECL 10'

3rd Aycl-Bioin Exchange from E14.5 DIV28 cortical neurons (culture)

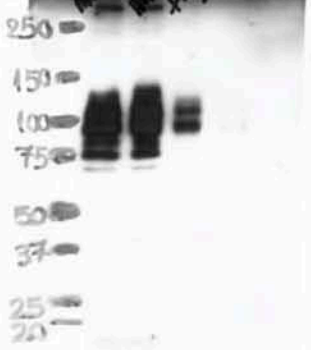

PSD-95 IB:  $\alpha$ -PSD-95, mouse monoclonal (Millipore)  
1:2000

2°:  $\alpha$ -mouse HRP-conjugated Ab  
1:10,000 in 1% milk

(16  $\mu$ l/lane) from (120  $\mu$ l sample + 40  $\mu$ l 4x laemmli)

INPUT-HA  
INPUT-HA  
+HA  
-HA

**A B C D**

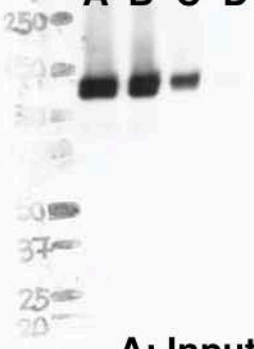

**Nrp-2 immunoblot**

Nrp2 IB:  $\alpha$ -Nrp2 Ab, rabbit (Cell Signaling)

1:1000 in 5% milk

2°:  $\alpha$ -rabbit HRP-conjugated Ab

1:10,000 in 1% milk

(16  $\mu$ l/lane) from (120  $\mu$ l sample + 40  $\mu$ l 4x laemmli)

**A: Input +HA  
B: Input -HA  
C: +HA  
D: -HA**
