# Supplementary material for: Palmitoylation regulates neuropilin-2 localization and function in cortical neurons and conveys specificity to semaphorin signaling via palmitoyl acyltransferases
Source: eLife journal article supplement (doi:10.7554/elife.83217), 2023-03-15
Supplement: fig2-data12 [file elife-83217-fig2-data12-v1.pdf]

ABE on deep layer primary cortical neurons

3rd ABE 5-12-11  
 Exposure: ECL 30"

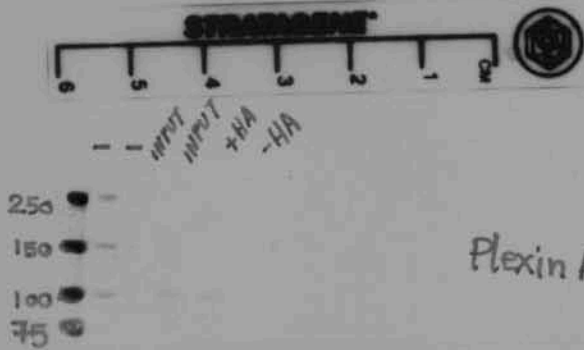

Plexin A3 Ab, rabbit (AbCam)

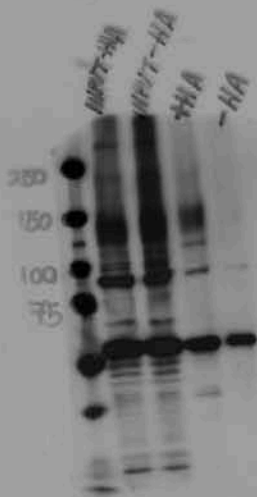

Nrp-1 immunoblot

Nrp1 IB:  $\alpha$ -Nrp1 Ab, goat (RandD)

1:1000 in 3% BSA/TBS-T overnight at 4°C

2°:  $\alpha$ -goat HRP-conjugated Ab

1:10000 in 1% milk

16  $\mu$ l/lane from [120  $\mu$ l sample + 40  $\mu$ l 4x Laemmli]

A B C D

- A: Input +HA
- B: Input -HA
- C: +HA
- D: -HA
