# Supplementary material for: Palmitoylation regulates neuropilin-2 localization and function in cortical neurons and conveys specificity to semaphorin signaling via palmitoyl acyltransferases
Source: eLife journal article supplement (doi:10.7554/elife.83217), 2023-03-15
Supplement: fig2-data13 [file elife-83217-fig2-data13-v1.pdf]

ABE on deep layer primary cortical neurons

3rd ABE 5-7-11 Exposure ECL 10'

3rd ABE-Biotin Exchange from  
E14.5 DIV28 cortical neurons (culture)

PSD-95 immunoblot

PSD-95 IB:  $\alpha$ -PSD-95, mouse monoclonal (Millipore)  
1:2000

2°:  $\alpha$ -mouse HRP-conjugated Ab  
1:10,000 in 1% milk

(16  $\mu$ l/lane) from (120  $\mu$ l sample + 40  $\mu$ l 4x Laemmli)

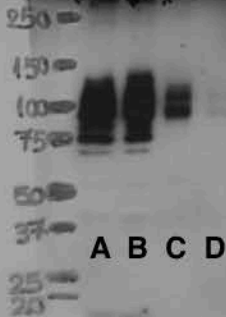

A B C D

A: Input +HA  
B: Input -HA  
C: +HA  
D: -HA

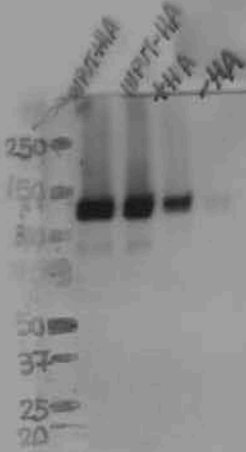

Nip2 IB:  $\alpha$ -Nip2 Ab, rabbit (Cell Signaling)  
1:1000 in 5% milk

2°:  $\alpha$ -rabbit HRP-conjugated Ab  
1:10,000 in 1% milk

(16  $\mu$ l/lane) from (120  $\mu$ l sample + 40  $\mu$ l 4x Laemmli)
