# Supplementary material for: Palmitoylation regulates neuropilin-2 localization and function in cortical neurons and conveys specificity to semaphorin signaling via palmitoyl acyltransferases
Source: eLife journal article supplement (doi:10.7554/elife.83217), 2023-03-15
Supplement: fig2-data14 [file elife-83217-fig2-data14-v1.pdf]

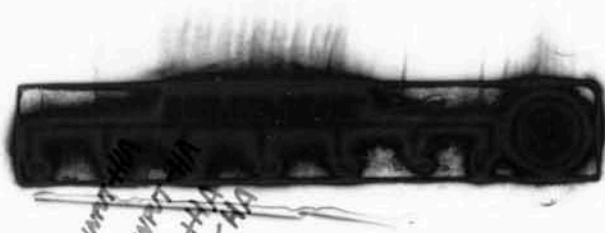

ABE on deep layer primary cortical neurons  
 5-9-11 3rd ABE  
 Exposure: ECLPlus 1!

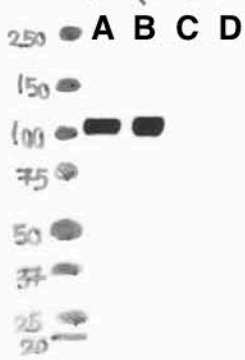

**SAP102 immunoblot**

A: Input +HA  
 B: Input -HA  
 C: +HA  
 D: -HA

1B:  $\alpha$ -SAP102 Ab, mouse monoclonal (NeuroMab)  
 1:1000 in 5% milk for 1hr at RT  
 2<sup>o</sup>:  $\alpha$ -mouse HRP-conjugated  
 1:1000 in 1% milk

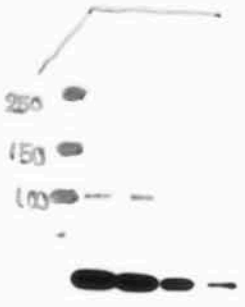

1B:  $\alpha$ -Flexin A3 Ab  
 did not work because I blocked in  
 milk instead of BSA.

3rd ABE (Acyl-Biotin Exchange) from Primary cortical neurons (culture)  
 E14.5 DIV28  
 16  $\mu$ l/lane from [120  $\mu$ l sample + 40  $\mu$ l 4X Laemmli buffer]
