# Supplementary material for: Palmitoylation regulates neuropilin-2 localization and function in cortical neurons and conveys specificity to semaphorin signaling via palmitoyl acyltransferases
Source: eLife journal article supplement (doi:10.7554/elife.83217), 2023-03-15
Supplement: fig2-data15 [file elife-83217-fig2-data15-v1.pdf]

EK/

# Neuropilin-2 Immunoblots (Cell Signaling #3366S) 4G+hABE

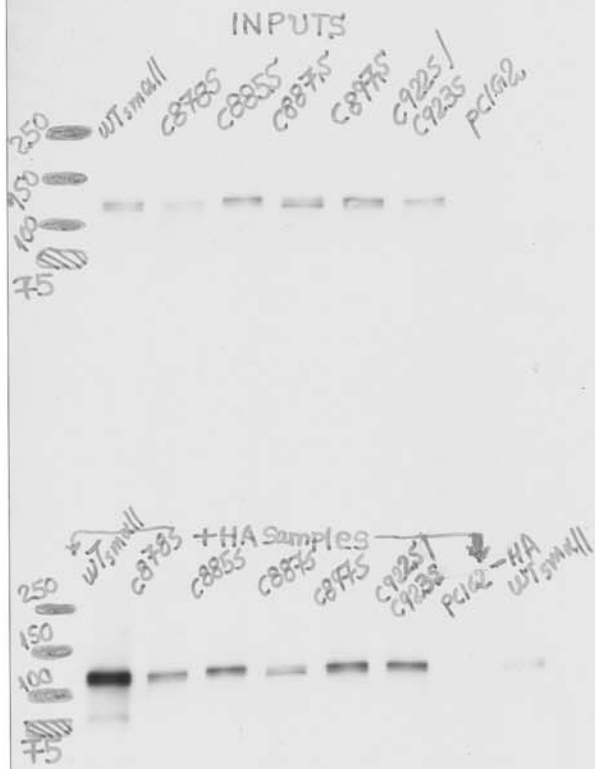

10/22/14  
4G+hABE: Nrp2 (western blot)

|                       |          |       |       |       |       |       |       |       |              |
|-----------------------|----------|-------|-------|-------|-------|-------|-------|-------|--------------|
| Load                  | wt small | C878S | C885S | C887S | C897S | C922S | C923S | PC162 | Inputs       |
| (samples of 10/14/14) |          |       |       |       |       |       |       |       |              |
| Load                  | wt small | C878S | C885S | C887S | C897S | C922S | C923S | PC162 | wt small -HA |
| + HA                  |          |       |       |       |       |       |       |       |              |
