# Supplementary material for: Palmitoylation regulates neuropilin-2 localization and function in cortical neurons and conveys specificity to semaphorin signaling via palmitoyl acyltransferases
Source: eLife journal article supplement (doi:10.7554/elife.83217), 2023-03-15
Supplement: fig2-data16 [file elife-83217-fig2-data16-v1.pdf]

EK/

ABE on Neuro2A cells expressing Nrp-2 plasmids

Neuropilin-2 Immunoblots  
(Cell Signaling #3366S)

4G+hABE Nrp-2 immunoblots

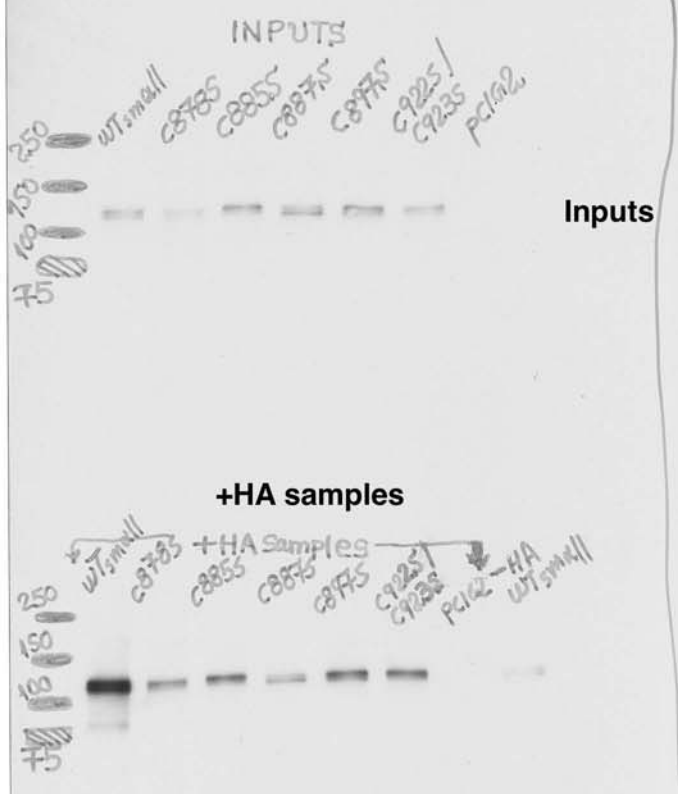

10/22/14  
 4G+hABE: Nrp2 (western blot)

|                       |          |       |       |       |       |       |       |       |              |
|-----------------------|----------|-------|-------|-------|-------|-------|-------|-------|--------------|
| load                  | WT small | C878S | C885S | C887S | C877S | C922S | C923S | PC162 | Inputs       |
| (samples of 10/14/14) |          |       |       |       |       |       |       |       | (back)       |
| double                | WT small | C878S | C885S | C887S | C877S | C922S | C923S | PC162 | WT small -HA |
| + HA                  |          |       |       |       |       |       |       |       |              |
