# Supplementary material for: Palmitoylation regulates neuropilin-2 localization and function in cortical neurons and conveys specificity to semaphorin signaling via palmitoyl acyltransferases
Source: eLife journal article supplement (doi:10.7554/elife.83217), 2023-03-15

4/4/16  $\frac{2}{5}$  sec.

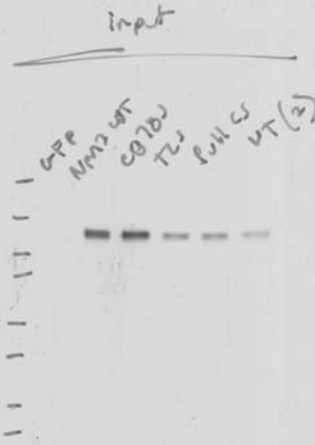

Supplement: fig2-data19 [file elife-83217-fig2-data19-v1.pdf]
