# Supplementary material for: Palmitoylation regulates neuropilin-2 localization and function in cortical neurons and conveys specificity to semaphorin signaling via palmitoyl acyltransferases
Source: eLife journal article supplement (doi:10.7554/elife.83217), 2023-03-15
Supplement: fig2-data20 [file elife-83217-fig2-data20-v1.pdf]

ABE on Neuro2A cells  
expressing Nrp-2 plasmids

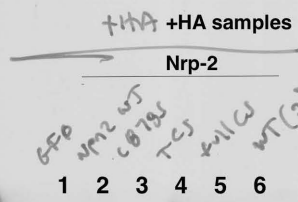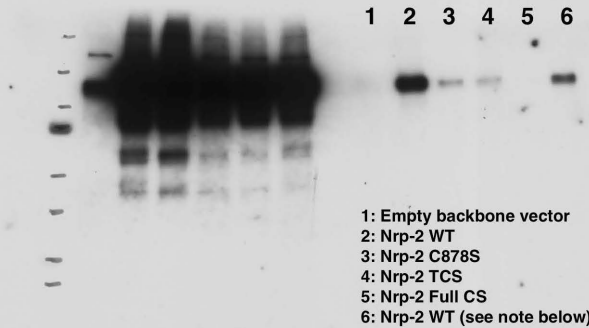

- 1: Empty backbone vector
- 2: Nrp-2 WT
- 3: Nrp-2 C878S
- 4: Nrp-2 TCS
- 5: Nrp-2 Full CS
- 6: Nrp-2 WT (see note below)

Note: Two different samples have been included for Nrp-2 WT (it is the control sample, duplicated in case of insufficient expression in one sample (one well of 6-well culture dish used for each plasmid/condition)).

Nrp-2 immunoblot

blot: +Nrp2 1:2000  
Ab 1:10,000  
BioRad ECL
