# Supplementary material for: Palmitoylation regulates neuropilin-2 localization and function in cortical neurons and conveys specificity to semaphorin signaling via palmitoyl acyltransferases
Source: eLife journal article supplement (doi:10.7554/elife.83217), 2023-03-15
Supplement: fig2-data21 [file elife-83217-fig2-data21-v1.pdf]

4/4/16 sec.

ABE on Neuro2A cells  
expressing Nrp-2 plasmids

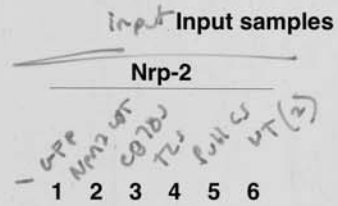

1: Empty backbone vector  
2: Nrp-2 WT  
3: Nrp-2 C878S  
4: Nrp-2 TCS  
5: Nrp-2 Full CS  
6: Nrp-2 WT  
Note: Nrp-2 WT duplicated (see blot of +HA samples)

blot: +HA  
Nrp-2 immunoblot
