# Supplementary material for: Palmitoylation regulates neuropilin-2 localization and function in cortical neurons and conveys specificity to semaphorin signaling via palmitoyl acyltransferases
Source: eLife journal article supplement (doi:10.7554/elife.83217), 2023-03-15
Supplement: fig2-data23 [file elife-83217-fig2-data23-v1.pdf]

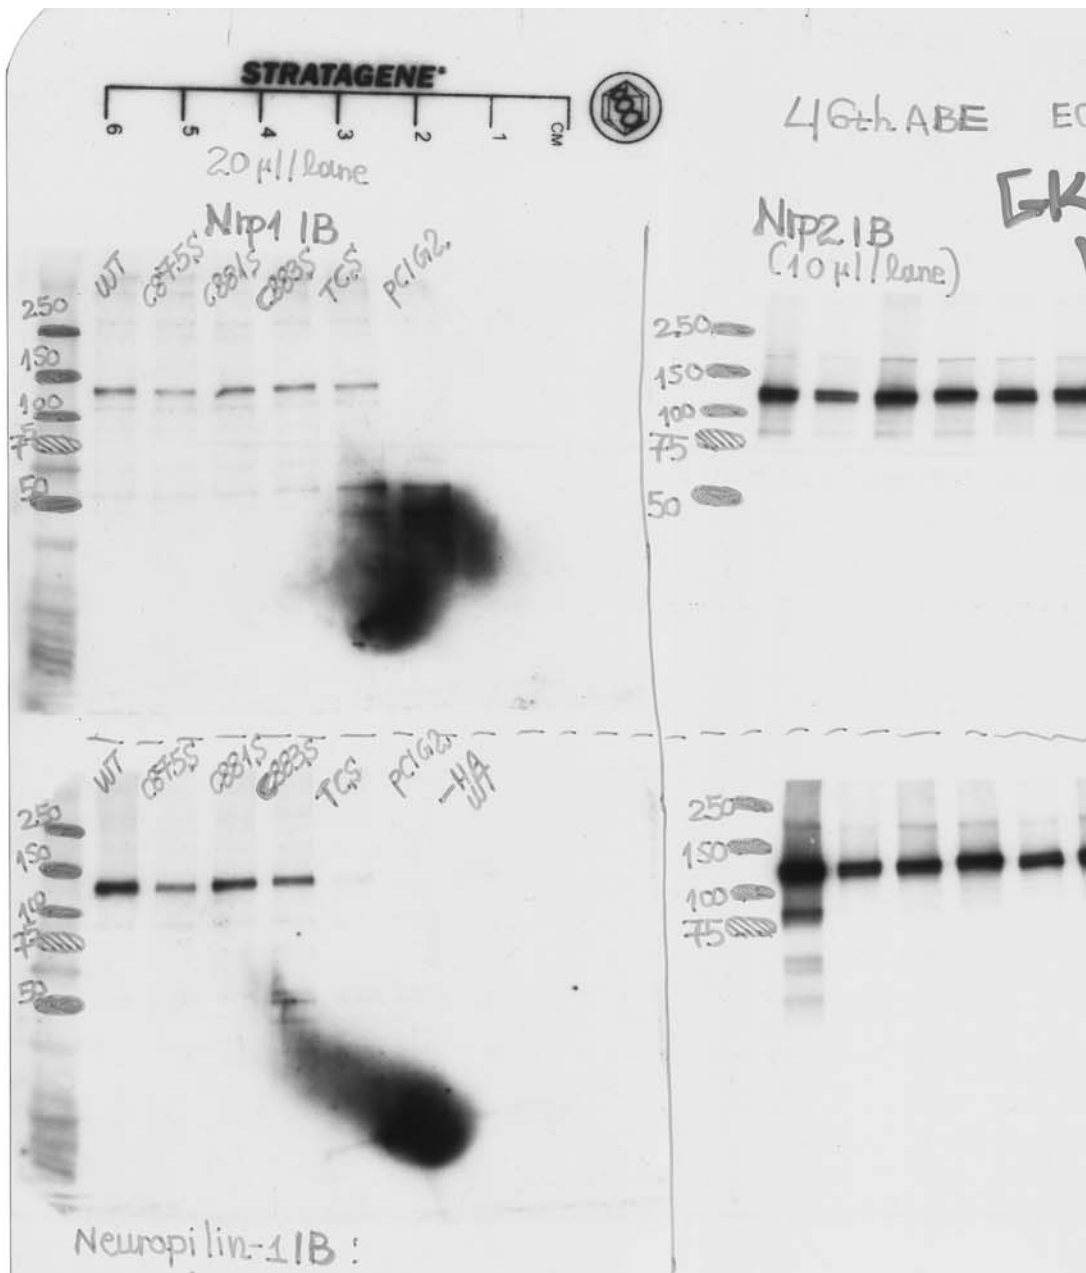

Neuropilin-1 IB :  
 Nrp1 Ab 1:1,000  
 (R.D., HAF566, goat)  
 O/N at 4°C  
 2°: HRP α-goat Ab  
 1:10,000 for 1 hr at RT

10/20/14  
 4Gth ABE: Western blots Nrp1

Input (back)

WT CB75S CB81S CB83S TCS PC162 -HA WT

+HA

EKIAK Nrp1  
 10/20/14
