# Supplementary material for: Palmitoylation regulates neuropilin-2 localization and function in cortical neurons and conveys specificity to semaphorin signaling via palmitoyl acyltransferases
Source: eLife journal article supplement (doi:10.7554/elife.83217), 2023-03-15
Supplement: fig3-figsupp3-data3 [file elife-83217-fig3-figsupp3-data3-v1.pdf]

## Golgi isolation from mouse whole brain

Six fractions (shown below) were collected from Golgi preparations

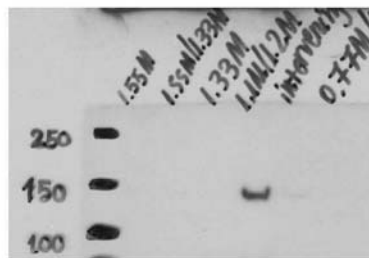

GM130 immunoblot  
(identifies the cis-Golgi fraction)
