# Supplementary material for: Palmitoylation regulates neuropilin-2 localization and function in cortical neurons and conveys specificity to semaphorin signaling via palmitoyl acyltransferases
Source: eLife journal article supplement (doi:10.7554/elife.83217), 2023-03-15

### Golgi isolation from mouse whole brain

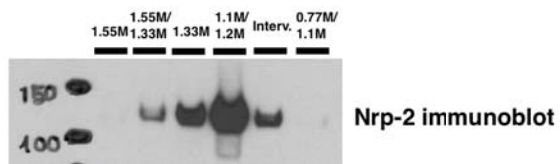

Supplement: fig3-figsupp3-data4 [file elife-83217-fig3-figsupp3-data4-v1.pdf]
