# Supplementary material for: Palmitoylation regulates neuropilin-2 localization and function in cortical neurons and conveys specificity to semaphorin signaling via palmitoyl acyltransferases
Source: eLife journal article supplement (doi:10.7554/elife.83217), 2023-03-15
Supplement: fig3-figsupp4-data7 [file elife-83217-fig3-figsupp4-data7-v1.pdf]

**Nrp-2 immunoblot  
Nrp-2 IP**

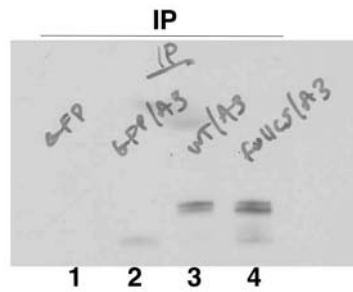

- 1: Backbone vector
- 2: Backbone vector + Myc-PlexA3
- 3: Flag-Nrp-2 WT + Myc-PlexA3
- 4: Flag-Nrp-2 Full CS + Myc-PlexA3
