# Supplementary material for: Palmitoylation regulates neuropilin-2 localization and function in cortical neurons and conveys specificity to semaphorin signaling via palmitoyl acyltransferases
Source: eLife journal article supplement (doi:10.7554/elife.83217), 2023-03-15
Supplement: fig3-figsupp4-data10 [file elife-83217-fig3-figsupp4-data10-v1.pdf]

6/16/12

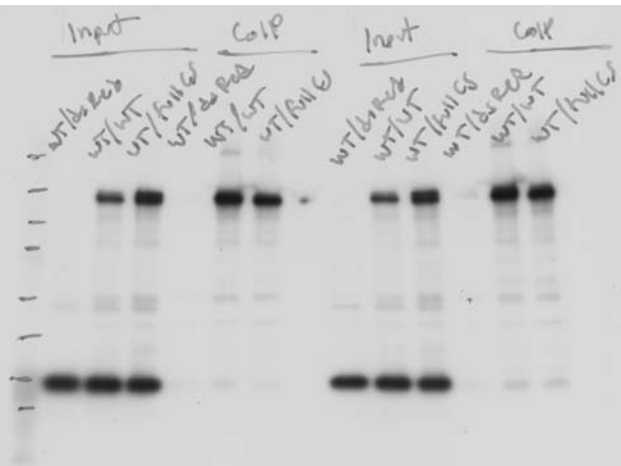

blot: ΔEFP 1:10,000

Actin 1:10,000

IP: ΔE1E2
