# Supplementary material for: Palmitoylation regulates neuropilin-2 localization and function in cortical neurons and conveys specificity to semaphorin signaling via palmitoyl acyltransferases
Source: eLife journal article supplement (doi:10.7554/elife.83217), 2023-03-15
Supplement: fig3-figsupp4-data11 [file elife-83217-fig3-figsupp4-data11-v1.pdf]

6/17/16 5 ser.

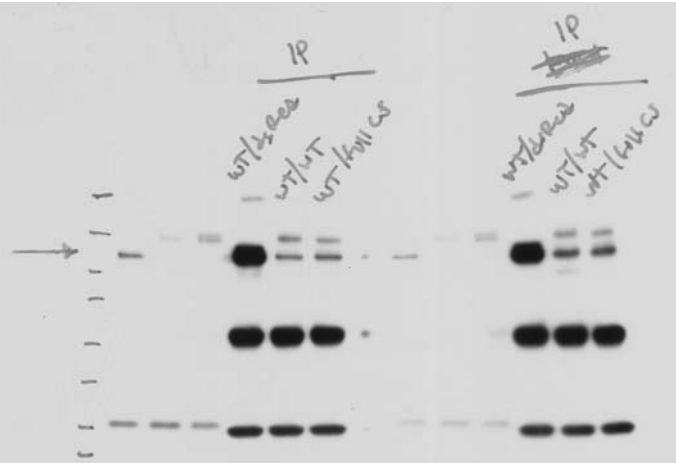

reprobe: + (1:1000)  
- (1:10,000)  
Rorac ECL
