# Supplementary material for: Palmitoylation regulates neuropilin-2 localization and function in cortical neurons and conveys specificity to semaphorin signaling via palmitoyl acyltransferases
Source: eLife journal article supplement (doi:10.7554/elife.83217), 2023-03-15
Supplement: fig3-figsupp4-data12 [file elife-83217-fig3-figsupp4-data12-v1.pdf]

6/24/16

repeat #1

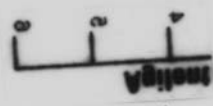

#2

wt/WT  
wt/WT  
wt/WT

wt/WT  
wt/WT  
wt/WT

Perm of input samples: homocimerization

blot:  $\alpha$ -Flag 1:1000

time 1: 10,000

Biorad ECL - 5 sec
