# Supplementary material for: Palmitoylation regulates neuropilin-2 localization and function in cortical neurons and conveys specificity to semaphorin signaling via palmitoyl acyltransferases
Source: eLife journal article supplement (doi:10.7554/elife.83217), 2023-03-15
Supplement: fig3-figsupp4-data17 [file elife-83217-fig3-figsupp4-data17-v1.pdf]

7/21/16 2sec.

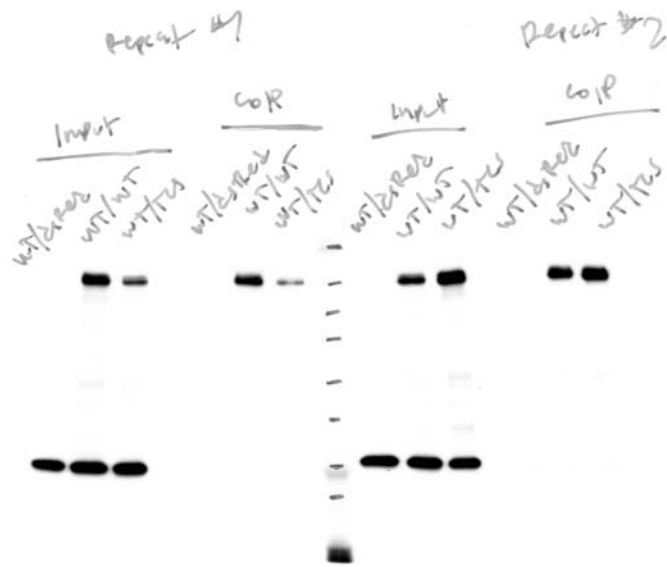

blot! 2 GFP 1:10,000  
actin 1:10,000  
BioRad ECL
