# Supplementary material for: Palmitoylation regulates neuropilin-2 localization and function in cortical neurons and conveys specificity to semaphorin signaling via palmitoyl acyltransferases
Source: eLife journal article supplement (doi:10.7554/elife.83217), 2023-03-15
Supplement: fig3-figsupp4-data18 [file elife-83217-fig3-figsupp4-data18-v1.pdf]

7/12/16 bel.

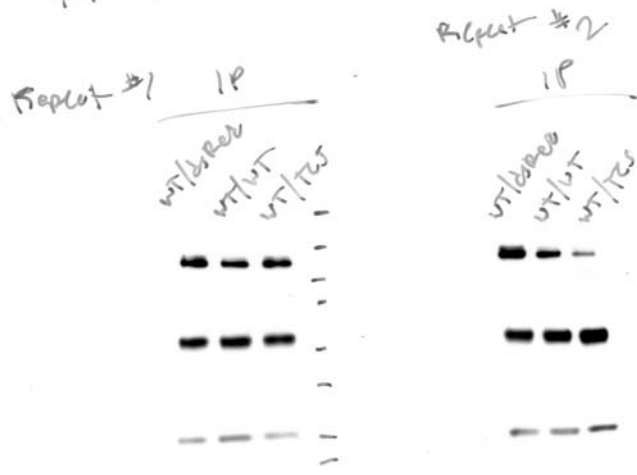

reprobe: dilig 1:600  
+ ns 1:10,000  
Biorad ECL
