# Supplementary material for: Palmitoylation regulates neuropilin-2 localization and function in cortical neurons and conveys specificity to semaphorin signaling via palmitoyl acyltransferases
Source: eLife journal article supplement (doi:10.7554/elife.83217), 2023-03-15
Supplement: fig3-figsupp4-data19 [file elife-83217-fig3-figsupp4-data19-v1.pdf]

7/14/14

1/14/14 1hr.

Repeat #1

Input

WT/Control  
WT/WT  
WT/TG

Repeat #2

Input

WT/Control  
WT/WT  
WT/TG

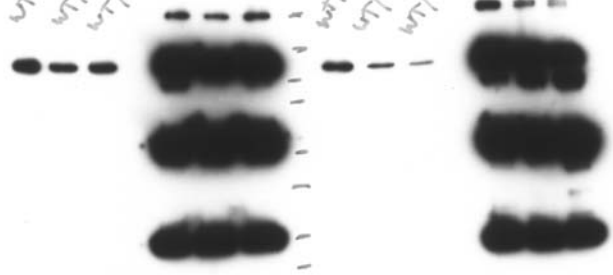

reprobe: 2-flag
