# Supplementary material for: Palmitoylation regulates neuropilin-2 localization and function in cortical neurons and conveys specificity to semaphorin signaling via palmitoyl acyltransferases
Source: eLife journal article supplement (doi:10.7554/elife.83217), 2023-03-15
Supplement: fig3-figsupp4-data20 [file elife-83217-fig3-figsupp4-data20-v1.pdf]

7/11/16 2sec.

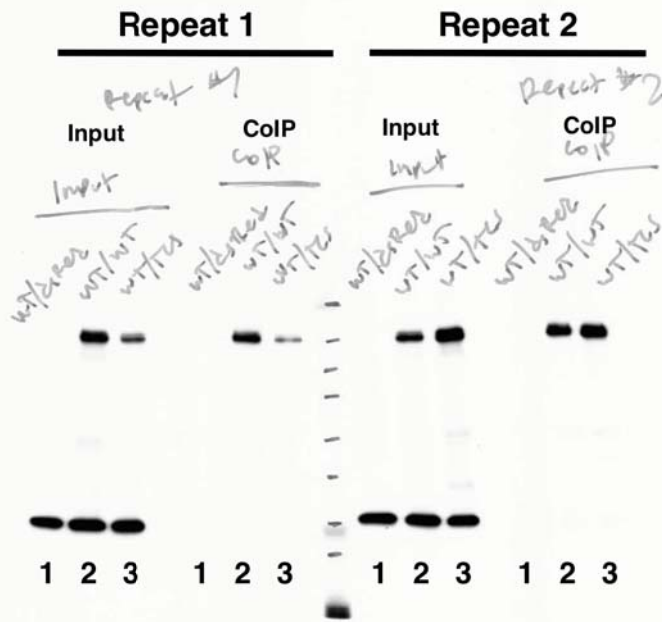

blot: GFP 1:10,000  
pHLuorin 1:10,000  
BioRad ECL

- 1: Flag-Nrp-2 WT + Backbone vector
- 2: Flag-Nrp-2 WT + pHLuorin-Nrp-2 WT
- 3: Flag-Nrp-2 WT + pHLuorin-Nrp-2 TCS
