# Supplementary material for: Palmitoylation regulates neuropilin-2 localization and function in cortical neurons and conveys specificity to semaphorin signaling via palmitoyl acyltransferases
Source: eLife journal article supplement (doi:10.7554/elife.83217), 2023-03-15
Supplement: fig3-figsupp4-data22 [file elife-83217-fig3-figsupp4-data22-v1.pdf]

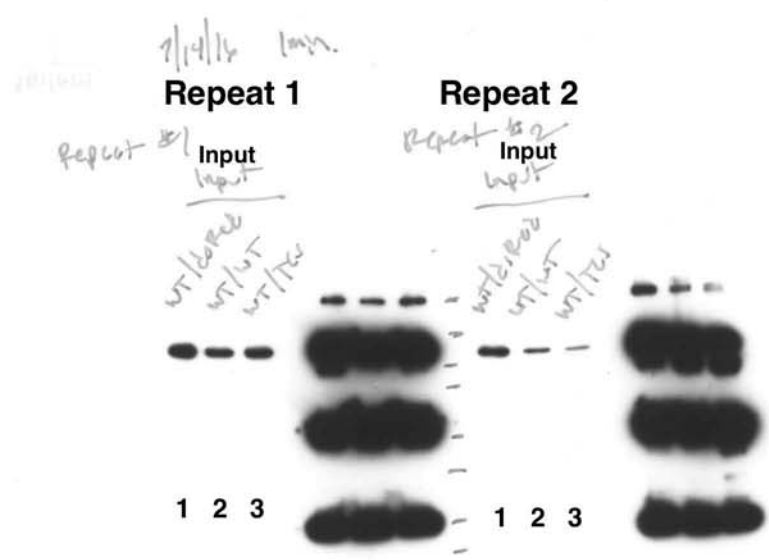

reprobe: 2-Flag      Flag immunoblot

- 1: Flag-Nrp-2 WT + Backbone vector
- 2: Flag-Nrp-2 WT + pHluorin-Nrp-2 WT
- 3: Flag-Nrp-2 WT + pHluorin-Nrp-2 TCS
