# Supplementary material for: Palmitoylation regulates neuropilin-2 localization and function in cortical neurons and conveys specificity to semaphorin signaling via palmitoyl acyltransferases
Source: eLife journal article supplement (doi:10.7554/elife.83217), 2023-03-15
Supplement: fig4-data2 [file elife-83217-fig4-data2-v1.pdf]

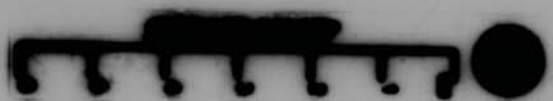

EK/AK 3/2/14  
 ECL Prime 2.0 sec. 36th ABE (II)

20  $\mu$ l/lane  
 Neuropilin-2 IB

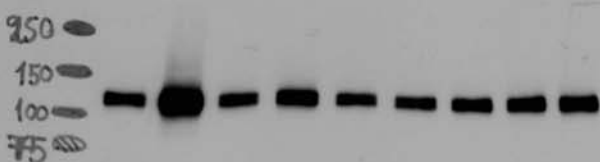

Inputs

1°: Neuropilin-2 Ab, rabbit  
 (Cell Signaling #33665)  
 1:1,000 o/N at 4°C in 5% milk

2°: HRP-conj.  $\alpha$ -rabbit Ab  
 1:10,000 in 1% milk for  
 1hr at RT

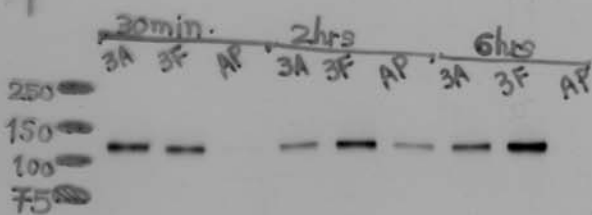

+ HA-samples

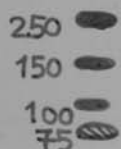

- HA-samples
