# Supplementary material for: Palmitoylation regulates neuropilin-2 localization and function in cortical neurons and conveys specificity to semaphorin signaling via palmitoyl acyltransferases
Source: eLife journal article supplement (doi:10.7554/elife.83217), 2023-03-15
Supplement: fig4-data3 [file elife-83217-fig4-data3-v1.pdf]

ABE on deep layer primary cortical neurons treated with Sema3F-AP, Sema3A-AP or AP with the indicated duration

EK/AK 3/21/14

ECL Prime 2.0 sec.

36h ABE (II)

20  $\mu$ l/lane

Neuropilin-2 IB

Nrp-2 immunoblots

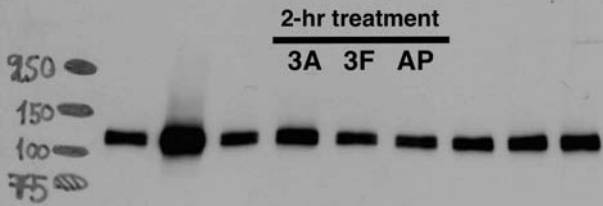

Inputs

Inputs

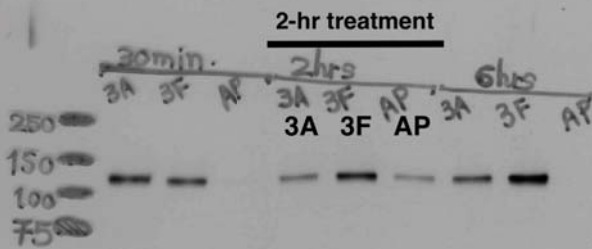

+HA samples

+HA-samples

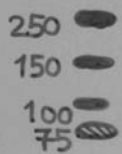

-HA samples

-HA-samples

1°: Neuropilin-2 Ab, rabbit (Cell Signaling #33665) 1:1,000 o/N at 4°C in 5% milk  
 2°: HRP-conj.  $\alpha$ -rabbit Ab 1:10,000 in 1% milk for 1hr at RT

Note: No signal in -HA samples; confirms specificity of palmitoylation signal (+HA samples)
