# Supplementary material for: Palmitoylation regulates neuropilin-2 localization and function in cortical neurons and conveys specificity to semaphorin signaling via palmitoyl acyltransferases
Source: eLife journal article supplement (doi:10.7554/elife.83217), 2023-03-15

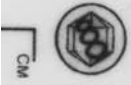

EK/AK ✓  
10/23/14

10 μl/lane (all samples)

45th ABE

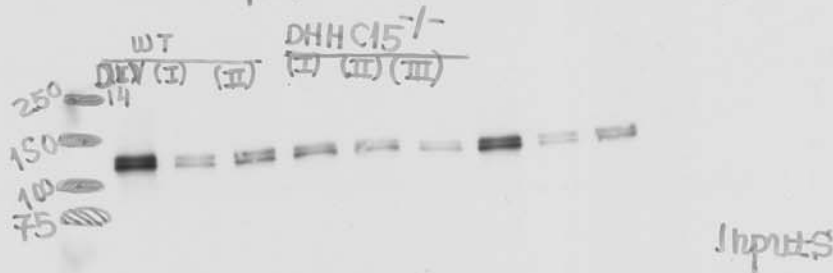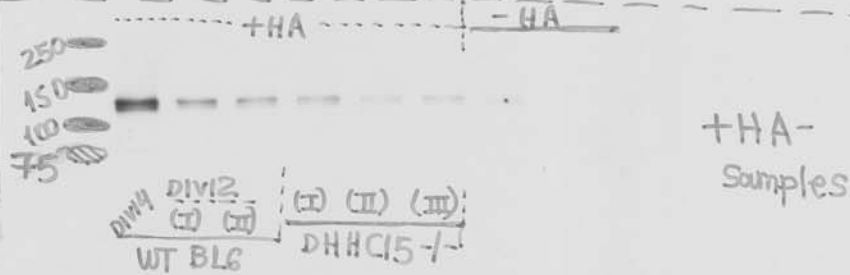

Neuropilin-2.1B:  
Nrp2 Ab 1:1,000  
(Cell Sign. # 3366S)  
O/N at 4°C  
2°: HRP-conjug.  
α-rabbit Ab  
1:10,000

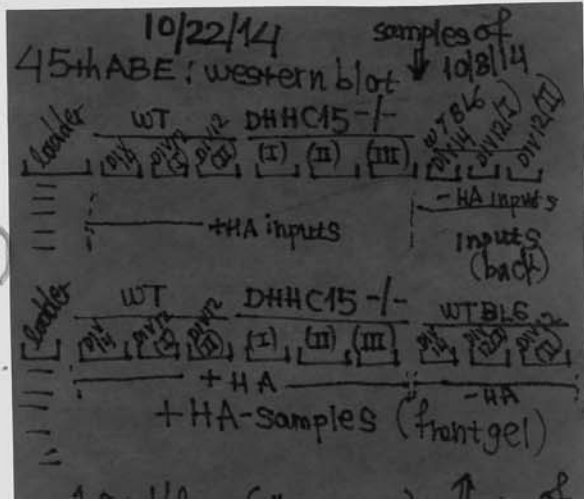

Supplement: fig6-data1 [file elife-83217-fig6-data1-v1.pdf]
