# Supplementary material for: Palmitoylation regulates neuropilin-2 localization and function in cortical neurons and conveys specificity to semaphorin signaling via palmitoyl acyltransferases
Source: eLife journal article supplement (doi:10.7554/elife.83217), 2023-03-15
Supplement: fig6-data2 [file elife-83217-fig6-data2-v1.pdf]

STRATAGENE

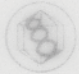

EK/AK  
12/2/14

ECL Prime 3''

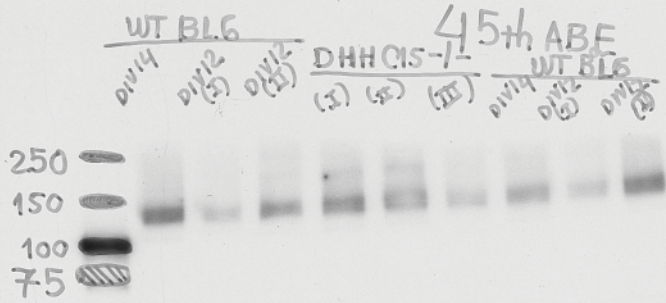

INPUTS

1<sup>o</sup>: Neuropilin-1 Ab, rabbit 1:1,000  
(abCam # ab81321)

o/N at 4°C

2<sup>o</sup>: α-rb HRP-conjugated Ab  
1:10,000 for 1hr at RT

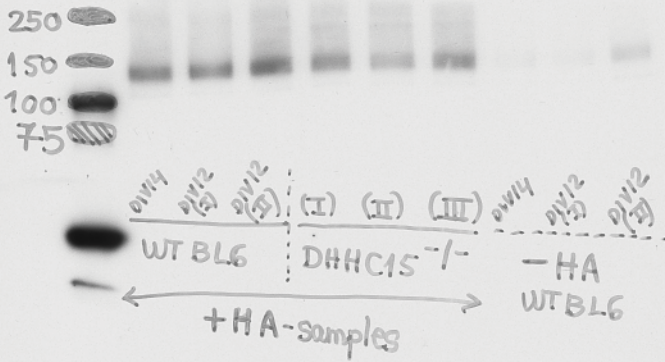

processed Samples

20 μl/lane

12/1/14 45th ABE  
Neuropilin-1 WB

lanes: DIV14 DIV12 (I) DIV12 (II) I II III WT BLG  
DIV14 DIV12 (I) DIV12 (II)

WT BLG DHHC15<sup>-/-</sup> -HA  
WTBLG

+ HA

20 μl/lane

samples of:  
10/8/14 & 10/11/14

Same order for inputs and  
processed samples

1<sup>o</sup> Ab: ab81321 rb mAb to Neuropilin-1  
[EPR3113]
