# Supplementary material for: Palmitoylation regulates neuropilin-2 localization and function in cortical neurons and conveys specificity to semaphorin signaling via palmitoyl acyltransferases
Source: eLife journal article supplement (doi:10.7554/elife.83217), 2023-03-15
Supplement: fig6-data3 [file elife-83217-fig6-data3-v1.pdf]

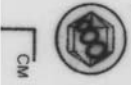

EK/AK  
10/23/14

ABE on WT or DHHC15<sup>-/-</sup> deep layer primary cortical neurons  
Nrp-2 immunoblots detect endogenous Nrp-2

10 μl/lane (all samples)

45th ABE

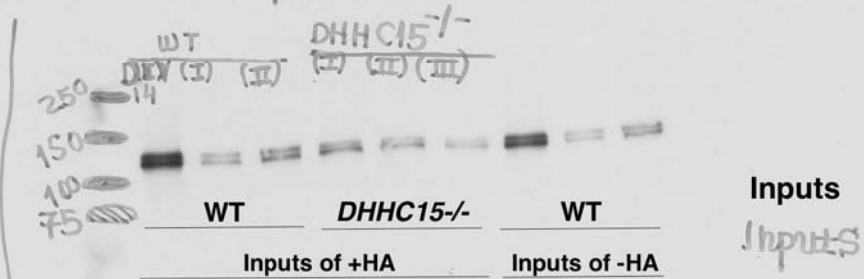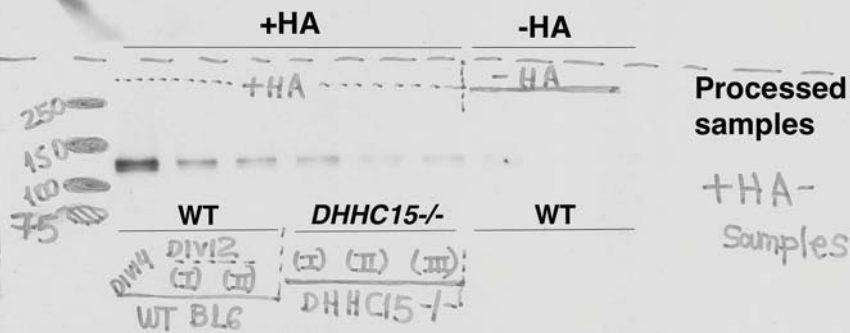

Neuropilin-2.1B:  
Nrp2 Ab 1:1,000  
(Cell Sign. # 3366S)  
O/N at 4°C  
2°: HRP-conjug.  
α-rabbit Ab  
1:10,000

10/22/14 samples of 10/28/14  
45th ABE: western blot  

| Lane      | WT    | DHHC15 <sup>-/-</sup> | WT BLG    |
|-----------|-------|-----------------------|-----------|
| DIY (I)   | (I)   | (I)                   | DIY (I)   |
| DIY (II)  | (II)  | (II)                  | DIY (II)  |
| DIY (III) | (III) | (III)                 | DIY (III) |

- HA inputs  
inputs (back)

| Lane      | WT    | DHHC15 <sup>-/-</sup> | WT BLG    |
|-----------|-------|-----------------------|-----------|
| DIY (I)   | (I)   | (I)                   | DIY (I)   |
| DIY (II)  | (II)  | (II)                  | DIY (II)  |
| DIY (III) | (III) | (III)                 | DIY (III) |

+ HA  
+ HA-samples (front gel)
