# Supplementary material for: Palmitoylation regulates neuropilin-2 localization and function in cortical neurons and conveys specificity to semaphorin signaling via palmitoyl acyltransferases
Source: eLife journal article supplement (doi:10.7554/elife.83217), 2023-03-15
Supplement: fig6-data4 [file elife-83217-fig6-data4-v1.pdf]

STRATAGENE

### ABE on WT or DHHC15<sup>-/-</sup> deep layer primary cortical neurons

ECL Prime 3''

EK/AK  
12/2/14

### Nrp-1 immunoblots detect endogenous Nrp-1

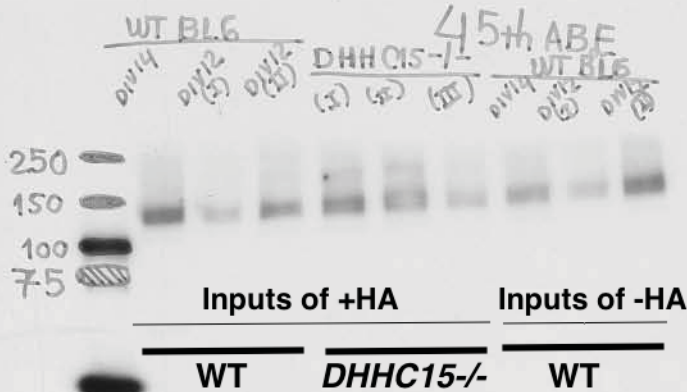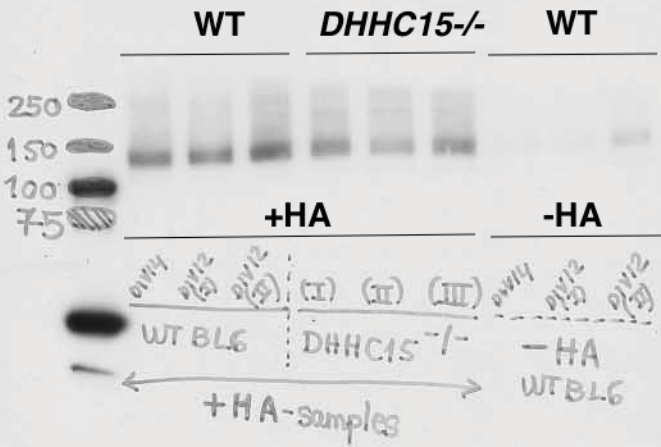

20 μl/lane

1<sup>o</sup>: Neuropilin-1 Ab, rabbit 1:1,000  
(abCam # ab81321)

O/N at 4°C

2<sup>o</sup>: α-rb HRP-conjugated Ab  
1:10,000 for 1hr at RT

### Processed samples

processed samples

12/1/14 45th ABE

Neuropilin-1 WB

ladder      DIV14      DIV12 (I)      DIV12 (II)      I      II      III      WT BLG (DIV14, DIV12 (I), DIV12 (II))

WT BLG      DHHC15<sup>-/-</sup>      -HA

← +HA →

20 μl/lane

Samples of: 10/8/14 & 10/11/14

Same order for inputs and processed samples

1<sup>o</sup> Ab: ab81321 rb mAb to Neuropilin-1 [EPR3113]
