# Supplementary material for: Palmitoylation regulates neuropilin-2 localization and function in cortical neurons and conveys specificity to semaphorin signaling via palmitoyl acyltransferases
Source: eLife journal article supplement (doi:10.7554/elife.83217), 2023-03-15
Supplement: fig6-figsupp1-data1 [file elife-83217-fig6-figsupp1-data1-v1.pdf]

49th ABE

EK/AK 7/21/15

NEUROPILIN-1

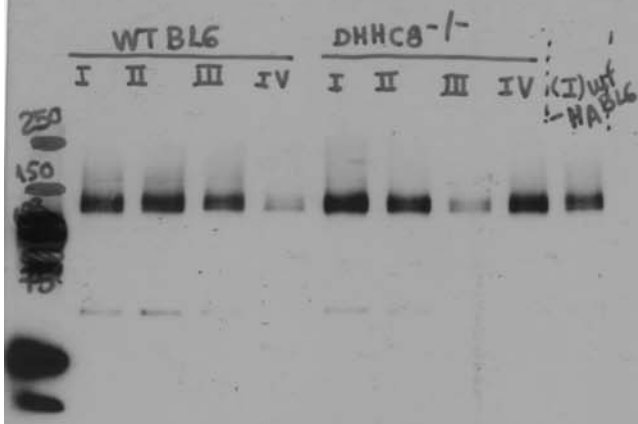

NEUROPILIN-2

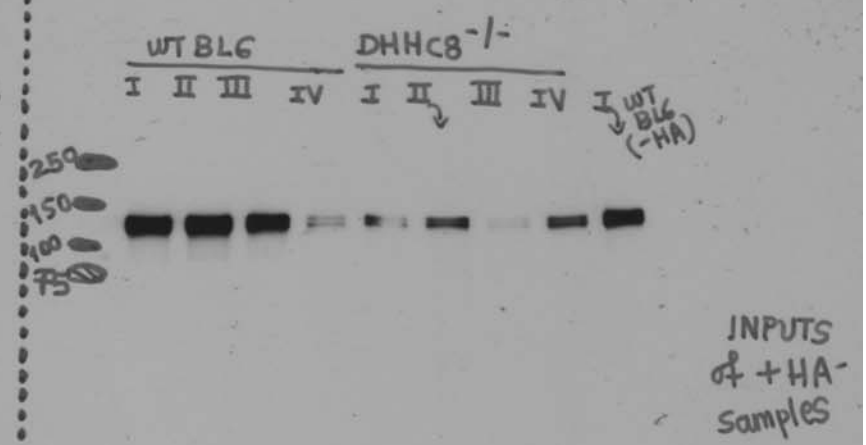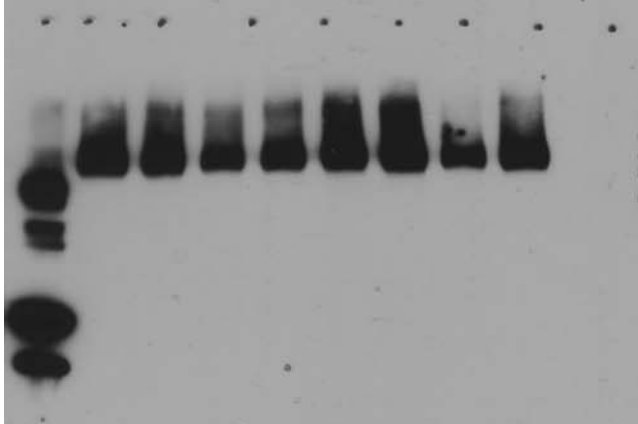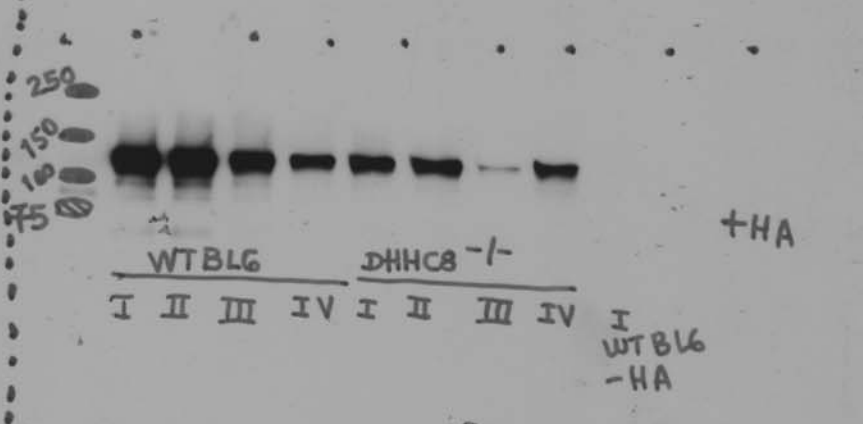

NEUROPILIN-1 IB:

- Npn1 Ab, Abcam # ab81321 rabbit 1:1000 o/N at 4°C
- 2°: HRP α-rabbit Ab 1:10,000 for 1hr at RT

NEUROPILIN-2 IB:

- Npn2 Ab, Cell Sign. #33665 rabbit, 1:1,000 o/N at 4°C
- 2°: HRP α-rabbit Ab 1:10,000 for 1hr at RT
