# Supplementary material for: Palmitoylation regulates neuropilin-2 localization and function in cortical neurons and conveys specificity to semaphorin signaling via palmitoyl acyltransferases
Source: eLife. 2023 Apr 3;12:e83217. doi: 10.7554/eLife.83217 (PMC10069869; doi:10.7554/eLife.83217)
Supplement: Figure 1—source data 1. [file elife-83217-fig1-data1.xlsx]

## Sheet: Sheet1
File analyzed: EK_SMitchell_12-17-14_Live staining COS7_Npn_40x oil_zoom1
Particle analysis: Image>Type: 8-bit, Image>Adjust>Threshold, Process>Binary>Make Binary, Edit>Selection>Create Mask, Analyze>Analyze Particles (size in sq. um: 0-infinity, circularity: 0.00-1.00, display results, summarize, in situ show)
Set Scale: 1024 pixels equals 160.04 μm, Scale: 6.398 pixels/μm
																	Experiment "EK_Smitchell_12-17-14_Live staining COS7" reanalyzed						Scale: 6.398 pixels/μm
Image	Count	Total Area	Average Size	%Area	IntDen	Skew	Min Area	Max Area	Count/Total Area								Image	Count	Total Area	Average Size	%Area	IntDen	Skew	Min Area	Max Area	Count/Total Area
Npn1 WT #1	217	288.328	1.329	1.126	338.818	NaN	0.024	121.008	0.75								Npn1 WT #1	162	189.67	1.171	0.741	298.555	NaN	0.024	68.687	0.854
Npn1 WT #2	175	281.733	1.61	1.1	410.525	NaN	0.024	186.079	0.62								Npn1 WT #2	120	223.793	1.865	0.874	475.561	NaN	0.024	162.264	0.536
Npn1 WT #3	97	85.297	0.879	0.333	224.233	NaN	0.024	20.958	1.14								Npn1 WT #3	66	45.946	0.696	0.179	177.518	NaN	0.024	6.107	1.436
Npn1 WT #4	524	1406.59	2.684	5.492	684.503	NaN	0.024	528.316	0.37								Npn1 WT #4	499	651.571	1.306	2.544	332.967	NaN	0.024	144.823	0.766
Npn1 WT #5	605	1020.04	1.686	3.983	429.935	NaN	0.024	297.756	0.59								Npn1 WT #5	325	508.506	1.565	1.985	398.982	NaN	0.024	97.046	0.639
Npn1 WT #6	766	1586.24	2.071	6.193	528.057	NaN	0.024	335.031	0.48								Npn1 WT #6	697	1395.72	2.002	5.449	510.628	NaN	0.024	287.986	0.499
Npn1 WT #7	254	218.2	0.859	0.852	219.059	NaN	0.024	19.712	1.16								Npn1 WT #7	170	112.849	0.664	0.441	169.274	NaN	0.024	13.141	1.506
Npn1 WT #8	273	413.17	1.513	1.613	385.928	NaN	0.024	144.042	0.66								Npn1 WT #8	256	384.958	1.504	1.503	383.454	NaN	0.024	139.156	0.665
Npn1 WT #9	320	519.058	1.622	2.027	413.625	NaN	0.024	67.954	0.62								Npn1 WT #9	299	396.585	1.326	1.548	338.225	NaN	0.024	32.267	0.754
Npn1 WT #10	246	533.445	2.168	2.083	552.962	NaN	0.024	129.264	0.46								Npn1 WT #10	234	455.941	1.948	1.78	496.859	NaN	0.024	57.084	0.513
Npn1 WT #11	188	443.361	2.358	1.731	601.368	NaN	0.024	105.033	0.42								Npn1 WT #11	177	326.97	1.847	1.277	471.059	NaN	0.024	79.898	0.541
Npn1 WT #12	370	863.689	2.334	3.372	595.245	NaN	0.024	272.622	0.43								Npn1 WT #12	304	634.155	2.086	2.476	531.939	NaN	0.024	131.462	0.479
Npn1 WT #13	330	606.236	1.837	2.367	468.455	NaN	0.024	196.778	0.54								Npn1 WT #13	198	298.758	1.509	1.166	384.764	NaN	0.024	109.625	0.663
Npn1 WT #14	333	392.774	1.18	1.534	300.773	NaN	0.024	79.214	0.85								Npn1 WT #14	260	212.851	0.819	0.831	208.757	NaN	0.024	36.517	1.222
Npn1 WT #15	453	441.603	0.975	1.724	248.584	NaN	0.024	79.337	1.03								Npn1 WT #15	318	261.19	0.821	1.02	209.445	NaN	0.024	48.071	1.218
Npn1 WT #16	324	390.845	1.206	1.526	307.609	NaN	0.024	34.197	0.83								Npn1 WT #16	327	383.444	1.173	1.497	299.016	NaN	0.024	33.488	0.853
Npn1 WT #17	265	351.934	1.328	1.374	338.653	NaN	0.024	72.668	0.75								Npn1 WT #17	198	178.849	0.903	0.698	230.336	NaN	0.024	57.548	1.107
Image	Count	Total Area	Average Size	%Area	IntDen	Skew	Min Area	Max Area	Count/Total Area								Image	Count	Total Area	Average Size	%Area	IntDen	Skew	Min Area	Max Area	Count/Total Area
Npn2 WT #1	147	21.715	0.148	0.085	37.669	NaN	0.024	4.079	6.77								Npn2 WT #1	94	9.477	0.101	0.037	25.71	NaN	0.024	0.489	9.919
Npn2 WT #2	532	50.538	0.095	0.197	24.224	NaN	0.024	2.101	10.53								Npn2 WT #2	71	6.497	0.092	0.025	23.336	NaN	0.024	0.464	10.928
Npn2 WT #3	220	27.431	0.125	0.107	31.795	NaN	0.024	2.101	8.02								Npn2 WT #3	106	11.212	0.106	0.044	26.971	NaN	0.024	0.928	9.454
Npn2 WT #4	192	20.323	0.106	0.079	26.991	NaN	0.024	1.221	9.45								Npn2 WT #4	116	11.383	0.098	0.044	25.022	NaN	0.024	1.001	10.191
Npn2 WT #5	421	37.91	0.09	0.148	22.962	NaN	0.024	0.684	11.11								Npn2 WT #5	163	14.094	0.086	0.055	22.049	NaN	0.024	0.44	11.565
Npn2 WT #6	224	29.922	0.134	0.117	34.063	NaN	0.024	4.983	7.49								Npn2 WT #6	77	8.427	0.109	0.033	27.908	NaN	0.024	0.855	9.137
Npn2 WT #7	244	35.027	0.144	0.137	36.606	NaN	0.024	2.443	6.97								Npn2 WT #7	43	6.522	0.152	0.025	38.676	NaN	0.024	1.148	6.593
Npn2 WT #9	447	59.82	0.134	0.234	34.125	NaN	0.024	2.907	7.47								Npn2 WT #9	362	48.95	0.135	0.191	34.482	NaN	0.024	2.272	7.395
Npn2 WT #10	758	88.96	0.117	0.347	29.927	NaN	0.024	3.053	8.52								Npn2 WT #10	235	21.715	0.092	0.085	23.563	NaN	0.024	1.148	10.822
#8 same with #3
