# Supplementary material for: Palmitoylation regulates neuropilin-2 localization and function in cortical neurons and conveys specificity to semaphorin signaling via palmitoyl acyltransferases
Source: eLife. 2023 Apr 3;12:e83217. doi: 10.7554/eLife.83217 (PMC10069869; doi:10.7554/eLife.83217)
Supplement: Figure 1—source data 2. [file elife-83217-fig1-data2.xlsx]

## Sheet: Sheet1
Quantification of Npn clustering on surface-stained COS7 cells_2BP vs control treatment_Particle Analysis
Particle analysis: Image>Type: 8-bit, Image>Adjust>Threshold, Process>Binary>Make Binary, Edit>Selection>Create Mask, Analyze>Analyze Particles (size in sq. um: 0-infinity, circularity: 0.00-1.00, display results, summarize, in situ show)
File of 6.22.15 Scale for 40X: 270 pixels/50 μm or 5.4 pixels/μm
File of 6.26.15 Scale for 40X: 270 pixels/50 μm or 5.4 pixels/μm
Experiment of 6.22.15
	Count	Total Area	Average Size	%Area	IntDen	Skew	Min Area	Max Area	Count/Total Area
Npn-2 control (DMSO), 10 μM Overnight
Npn2 DMSO overnight 1.tiff	147	102.023	0.694	0.155	176.979	NaN	0.034	12.174	1.44
Npn2 DMSO overnight 2.tiff	395	364.129	0.922	0.553	235.071	NaN	0.034	23.251	1.08
Npn2 DMSO overnight 3.tiff	259	371.982	1.436	0.565	366.237	NaN	0.034	54.595	0.7
Npn2 DMSO overnight 4.tiff	252	182.51	0.724	0.277	184.683	NaN	0.034	54.733	1.38
Npn2 DMSO overnight 5.tiff	520	535.254	1.029	0.813	262.48	NaN	0.034	165.398	0.97
Experiment of 6.26.15
Npn2 DMSO.ON 1.tiff	188	194.925	1.037	0.296	264.392	NaN	0.034	40.021	0.96
Npn2 DMSO.ON 2.tiff	193	315.021	1.632	0.478	416.219	NaN	0.034	30.693	0.61
Npn2 DMSO.ON 3.tiff	130	123.217	0.948	0.187	241.694	NaN	0.034	19.65	1.06
Npn2 DMSO.ON 4.tiff	105	33.882	0.323	0.051	82.285	NaN	0.034	3.395	3.1
Npn2 DMSO ON 5.tiff	117	83.093	0.71	0.126	181.101	NaN	0.034	7.339	1.41
Npn2 DMSO.ON 6.tiff	167	153.669	0.92	0.233	234.645	NaN	0.034	27.778	1.09
Npn-2 2BP, 10 μM, Overnight	Count	Total Area	Average Size	%Area	IntDen	Skew	Min Area	Max Area
Experiment of 6.22.15
Npn2 2BP 10uM overnight1.tiff	181	195.679	1.081	0.297	275.68	NaN	0.034	35.425	0.92
Npn2 2BP 10uM overnight2.tiff	117	258.059	2.206	0.392	562.436	NaN	0.034	86.591	0.45
Npn2 2BP 10uM overnight3.tiff	231	380.316	1.646	0.578	419.829	NaN	0.034	64.712	0.61
Npn2 2BP 10uM overnight4.tiff	236	556.104	2.356	0.845	600.875	NaN	0.034	112.209	0.42
Npn2 2BP 10uM overnight5.tiff	101	128.189	1.269	0.195	323.646	NaN	0.034	11.42	0.79
Experiment of 6.26.15
Npn2-10uM.ON1.tiff	162	281.687	1.739	0.428	443.397	NaN	0.034	45.816	0.58
Npn2-10uM.ON2.tiff	44	239.952	5.453	0.364	1390.63	NaN	0.034	180.418	0.18
Npn2-10uM.ON3.tiff	192	233.025	1.214	0.354	309.486	NaN	0.034	86.66	0.82
Npn2-10uM.ON4.tiff	211	360.974	1.711	0.548	436.248	NaN	0.034	48.217	0.58
Npn2-10uM.ON5.tiff	194	433.333	2.234	0.658	569.588	NaN	0.034	128.018	0.45
Npn2-10uM.ON6.tiff	291	381.687	1.312	0.58	334.468	NaN	0.034	29.938	0.76
												Re-analyzed in order to remove the clumps of protein that interfere with analysis, Scale: 5.400 pixels/μm
	Count	Total Area	Average Size	%Area	IntDen	Skew	Min Area	Max Area	Count/Total Area				Count	Total Area	Average Size	%Area	IntDen	Skew	Min Area	Max Area	Count/Total Area
Npn-1 control (DMSO), 10 μM Overnight												Npn-1 control (DMSO), 10 μM Overnight
Experiment of 6.22.15												Experiment of 6.22.15
Npn1 DMSO overnight1.tiff	162	657.545	4.059	0.999	1035.02	NaN	0.034	209.362	0.25			Npn1 DMSO overnight 1	117	304.321	2.601	0.462	663.264	NaN	0.034	148.32	0.38
Npn1 DMSO overnight2.tiff	82	315.775	3.851	0.48	981.983	NaN	0.034	126.543	0.26			Npn1 DMSO overnight 2	57	231.516	4.062	0.352	1035.73	NaN	0.034	119.925	0.25
Experiment of 6.26.15												Experiment of 6.26.15
Npn1-DMSO.ON1.tiff	77	1239.23	16.094	1.882	4103.95	NaN	0.034	1015.09	0.06			Npn1-DMSO.ON1	106	73.903	0.697	0.112	177.785	NaN	0.034	6.241	1.43
Npn1-DMSO.ON2.tiff	101	280.727	2.779	0.426	708.766	NaN	0.034	60.357	0.36
Npn1-DMSO.ON3.tiff	63	36.385	0.578	0.055	147.274	NaN	0.034	7.202	1.73
Npn1-DMSO.ON4.tiff	95	64.335	0.677	0.098	172.688	NaN	0.034	10.254	1.48
Npn1-DMSO.ON5.tiff	149	570.988	3.832	0.867	977.194	NaN	0.034	141.632	0.26
Npn1-DMSO.ON6.tiff	97	510.151	5.259	0.775	1341.12	NaN	0.034	418.313	0.19
	Count	Total Area	Average Size	%Area	IntDen	Skew	Min Area	Max Area					Count	Total Area	Average Size	%Area	IntDen	Skew	Min Area	Max Area	Count/Total Area
Npn-1 2BP, 10 μM Overnight												Npn-1 2BP, 10 μM Overnight
Experiment of 6.22.15												Experiment of 6.22.15
Npn1_2BP 10uM overnight.tiff	290	841.598	2.902	1.278	740.026	NaN	0.034	94.513	0.34
Npn1_2BP 10uM overnight#2.tiff	56	115.775	2.067	0.176	527.19	NaN	0.034	62.894	0.48
Experiment of 6.26.15												Experiment of 6.26.15
Npn1-10uM.ON1.tiff	78	52.332	0.671	0.079	171.085	NaN	0.034	6.756	1.49
Npn1-10uM.ON2.tiff	122	1134.46	9.299	1.723	2371.22	NaN	0.034	952.229	0.11			Npn1-10uM.ON2	66	78.601	1.191	0.119	303.685	NaN	0.034	20.37	0.84
Npn1-10uM.ON3.tiff	419	2662.04	6.353	4.043	1620.09	NaN	0.034	1200.93	0.16			Npn1-10uM.ON3	324	625.686	1.931	0.95	492.438	NaN	0.034	100.926	0.52
Npn1-10uM.ON4.tiff	132	221.982	1.682	0.337	428.829	NaN	0.034	98.148	0.59
Npn1-10uM.ON5.tiff	154	161.728	1.05	0.246	267.797	NaN	0.034	15.398	0.95
Npn1-10uM.ON6.tiff	32	15.089	0.472	0.023	120.242	NaN	0.034	2.743	2.12
New Analysis for frames 1024x1024: 189.63 x 189.63 μm										Scale: 270 pixels equals 50 μm, 5.400 pixels/μm
Npn-2 control (DMSO), 10 μM Overnight	Count	Total Area	Average Size	%Area	IntDen	Skew	Min Area	Max Area	Count/Total Area
6.22.15
Npn2 DMSO overnight 1	128	71.159	0.556	0.198	141.762	NaN	0.034	8.848	1.799
Npn2 DMSO overnight 2 (left lower)	216	183.813	0.851	0.511	217.002	NaN		20.062	1.175
Npn2 DMSO overnight 2 (right upper)	257	204.424	0.795	0.568	202.833	NaN		19.067	1.257
Npn2 DMSO overnight 3 (left lower)	154	156.413	1.016	0.435	258.995	NaN		15.604	0.985
Npn2 DMSO overnight 3 (right upper)	107	168.244	1.572	0.468	400.956	NaN		27.229	0.636
Npn2 DMSO overnight 4	238	172.531	0.725	0.48	184.854	NaN		53.464	1.379
Npn2 DMSO overnight 5	308	353.086	1.146	0.982	292.328	NaN		115.706	0.872
6.26.15
Npn2-DMSO.ON1	123	110.597	0.899	0.308	229.286	NaN		31.55	1.112
Npn2-DMSO.ON2	169	313.752	1.857	0.873	473.412	NaN		40.878	0.539
Npn2-DMSO.ON3	226	252.263	1.116	0.702	284.633	NaN		43.793	0.896
Npn2-DMSO.ON4	359	137.62	0.383	0.383	97.752	NaN		5.83	2.609
Npn2-DMSO.ON5	181	132.51	0.732	0.368	186.686	NaN		9.328	1.366
Npn2-DMSO.ON6 (left)	118	47.668	0.404	0.133	103.011	NaN		2.709	2.475
Npn2-DMSO.ON6 (right)	134	160.288	1.196	0.475	305.026	NaN		31.001	0.836
Npn-2 2BP, 10 μM, Overnight	Count	Total Area	Average Size	%Area	IntDen	Skew	Min Area	Max Area	Count/Total Area
6.22.15
Npn2 2BP 10uM overnight 1	157	167.695	1.068	0.466	272.372	NaN		33.985	0.936
Npn2 2BP 10uM overnight 2 (left)	46	41.084	0.893	0.114	227.746	NaN		10.905	1.12
Npn2 2BP 10uM overnight 2 (right)	110	253.326	2.303	0.704	587.257	NaN		88.546	0.434
Npn2 2BP 10uM overnight 3	132	178.258	1.35	0.496	344.362	NaN		21.433	0.74
Npn2 2BP 10uM overnight 4	181	306.996	1.696	0.854	432.508	NaN		47.462	0.59
Npn2 2BP 10uM overnight 5	130	256.687	1.975	0.714	503.502	NaN		31.344	0.506
6.26.15
Npn2-10uM.ON1	92	108.711	1.182	0.302	301.317	NaN		24.931	0.846
Npn2-10uM.ON2	54	290.912	5.387	0.809	1373.75	NaN		214.198	0.186
Npn2-10uM.ON3 (left)	273	351.475	1.287	0.977	328.3	NaN		44.102	0.777
Npn2-10uM.ON3 (right)	118	191.152	1.62	0.532	413.083	NaN		82.476	0.617
Npn2-10uM.ON4	216	435.494	2.016	1.211	514.125	NaN		50.995	0.496
Npn2-10uM.ON5 (left)	147	436.557	2.97	1.215	757.293	NaN		148.114	0.337
Npn2-10uM.ON5 (right)	119	148.594	1.249	0.413	318.416	NaN		36.866	0.801
Npn2-10uM.ON6 (left)	172	339.369	1.973	0.944	503.134	NaN		53.498	0.507
Npn2-10uM.ON6 (right)	286	446.262	1.56	1.241	397.891	NaN		44.41	0.641
Npn-1 control (DMSO), 10 μM Overnight	Count	Total Area	Average Size	%Area	IntDen	Skew	Min Area	Max Area	Count/Total Area
6.22.15
Npn1 DMSO overnight 1	127	360.94	2.842	1.004	724.721	NaN		153.978	0.352
Npn1 DMSO overnight 2	86	335.665	3.903	0.933	995.287	NaN		128.875	0.256
6.26.15
Npn1-DMSO.ON1	160	222.291	1.389	0.618	354.276	NaN		18.69	0.72
Npn1-DMSO.ON2	75	439.232	5.856	1.221	1493.39	NaN		181.79	0.171
Npn1-DMSO.ON3	92	64.746	0.704	0.18	179.46	NaN	0.034	8.128	1.421
Npn1-DMSO.ON4	98	67.078	0.684	0.187	174.54	NaN		18.896	1.461
Npn1-DMSO.ON5	116	543.21	4.683	1.511	1194.12	NaN		143.381	0.214
Npn1-DMSO.ON6	146	396.914	2.719	1.104	693.239	NaN		102.092	0.368
Npn-1 2BP, 10 μM Overnight	Count	Total Area	Average Size	%Area	IntDen	Skew	Min Area	Max Area	Count/Total Area
6.22.15
Npn1_2BP 10uM overnight	153	360.94	2.359	1.004	601.566	NaN		50.069	0.424
Npn1_2BP 10uM overnight 2	41	207.03	5.05	0.576	1287.63	NaN		97.702	0.198
6.26.15
Npn1-10uM.ON1	57	36.42	0.639	0.101	162.93	NaN		4.458	1.565
Npn1-10uM.ON2	124	289.678	2.336	0.806	595.708	NaN		123.56	0.428
Npn1-10uM.ON3	259	401.612	1.551	1.117	395.409	NaN		83.436	0.645
Npn1-10uM.ON4	132	169.822	1.287	0.471	328.065	NaN		25.343	0.777
Npn1-10uM.ON5	101	113.923	1.128	0.317	287.628	NaN		13.786	0.887
Npn1-10uM.ON6	60	38.615	0.644	0.107	164.112	NaN		3.395	1.554
