# Supplementary material for: Palmitoylation regulates neuropilin-2 localization and function in cortical neurons and conveys specificity to semaphorin signaling via palmitoyl acyltransferases
Source: eLife. 2023 Apr 3;12:e83217. doi: 10.7554/eLife.83217 (PMC10069869; doi:10.7554/eLife.83217)
Supplement: Figure 2—source data 10. [file elife-83217-fig2-data10.pdf]

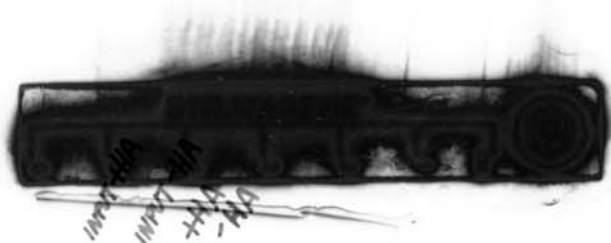

5-9-11 3rd ABE  
Exposure: ECL Plus 1!

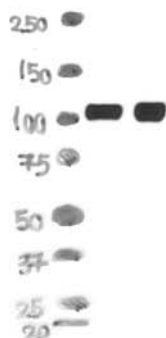

1B:  $\alpha$ -SAP102 Ab, mouse monoclonal (NeuroMab)  
1:1000 in 5% milk for 1 hr at RT  
2°:  $\alpha$ -mouse HRP-conjugated  
1:1000 in 1% milk

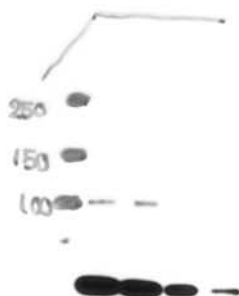

1B:  $\alpha$ -Flexin A3 Ab  
did not work because I blocked in  
milk instead of BSA.

3rd ABE (AcyI-Biotin Exchange) from Primary cortical neurons (culture)  
E14.5 DIV28  
16  $\mu$ l/lane from [120  $\mu$ l sample + 40  $\mu$ l 4X Laemmli buffer]
