# Supplementary material for: Palmitoylation regulates neuropilin-2 localization and function in cortical neurons and conveys specificity to semaphorin signaling via palmitoyl acyltransferases
Source: eLife. 2023 Apr 3;12:e83217. doi: 10.7554/eLife.83217 (PMC10069869; doi:10.7554/eLife.83217)
Supplement: Figure 2—source data 17. [file elife-83217-fig2-data17.xlsx]

## Sheet: Sheet1
Flag-tagged Npn-2 CS plasmids in N2A cells_Collective analysis
	CS mutants normalized to WT
	Npn-2 plasmid ratio +HA/Input	32nd ABE	41st ABE	46th ABE	AVERAGE	STDEV	SEM
	WT	100	100	100	100	0	0
	C878S	22	5	19.4	15.4667	9.15715	5.3
	C885S	60		48.8	54.4	7.9196	22.8
	C887S		64	24	44	28.2843	20
	C897S		61	49.4	55.2	8.20244	5.8
	C922S/C923S		65	44.8	54.9	14.2836	10.1
	C885S in 41st ABE is not in the linear range
