# Supplementary material for: Palmitoylation regulates neuropilin-2 localization and function in cortical neurons and conveys specificity to semaphorin signaling via palmitoyl acyltransferases
Source: eLife. 2023 Apr 3;12:e83217. doi: 10.7554/eLife.83217 (PMC10069869; doi:10.7554/eLife.83217)
Supplement: Figure 2—source data 22. [file elife-83217-fig2-data22.xlsx]

## Sheet: Sheet1
57th ABE					w=0.28, h=0.20
	HA	Input	HA/Input	Normalized
WT	48699	8570.34	5.68227	1
C878S	14470.8	25908.8	0.558529	0.0982933
TCS	0	22298.1	0	0
fulll CS	0	18178.5	0	0
new ABE_Sarah Mitchell					w=0.20, h=0.20
	HA	Input	HA/Input	Normalized
WT	41800.4	17543.3	2.3827	1
C878S	6300.05	20181.9	0.312163	0.131013
TCS	4191.76	7744.92	0.541227	0.227149
fulll CS	184.364	7032.34	0.0262166	0.0110029
AVERAGE	57th ABE	new ABE	Average
WT	1	1	1
C878S	0.0982933	0.131013	0.114653
TCS	0	0.227149	0.113574
fulll CS	0	0.0110029	0.00550146
