# Supplementary material for: Palmitoylation regulates neuropilin-2 localization and function in cortical neurons and conveys specificity to semaphorin signaling via palmitoyl acyltransferases
Source: eLife. 2023 Apr 3;12:e83217. doi: 10.7554/eLife.83217 (PMC10069869; doi:10.7554/eLife.83217)
Supplement: Figure 2—source data 25. [file elife-83217-fig2-data25.xlsx]

## Sheet: Sheet1
Nrp1 plasmid	18th ABE	33rd ABE	46th ABE	47th ABE	Average	STDEV	SEM
WT	100	100	100	100	100	0	0
C875S	3	36	87	45	43	34.5868	17
C881S	89	107	87	138	105	23.6132	12
C883S	62	33	72	58	56	16.5806	8
TCS	0	15	6	4	6	6.34429	3
							Last update:11/5/14
