# Supplementary material for: Palmitoylation regulates neuropilin-2 localization and function in cortical neurons and conveys specificity to semaphorin signaling via palmitoyl acyltransferases
Source: eLife. 2023 Apr 3;12:e83217. doi: 10.7554/eLife.83217 (PMC10069869; doi:10.7554/eLife.83217)
Supplement: Figure 3—figure supplement 1—source data 1. [file elife-83217-fig3-figsupp1-data1.xlsx]

## Sheet: Sheet1
EK/SM 12-18-15 flag-Npn2 CS_COS7_live staining_Ria's analysis
Image.adjust.threshold						A=C922S/C923S
Paintbrush to erase background						B=full CS
Analyze.analyze particles		Size:0-infinity, Circularity:0-1				C=TCS
Summary						D=WT
Image	Slice	Count	Total area	Average Size	% Area	Mean	IntDen		Count/Total Area
A1	A1.tiff	39	1176	30.154	0.061	255	7689.23		0.033
A2	A2.tiff	53	585	11.038	0.03	255	2814.62		0.091
A3	A3.tiff	41	1129	27.537	0.059	255	7021.83		0.036
A4 left	A4.tiff	98	2086	21.286	0.109	255	5427.86		0.047
A5	A5.tiff	56	842	15.036	0.044	255	3834.11		0.067
A6	A6.tiff	121	1145	9.463	0.06	255	2413.02		0.106
A7	A7.tiff	51	1386	27.176	0.072	255	6930		0.037
A8	A8.tiff	51	795	15.588	0.041	255	3975		0.064
A9	A9.tiff	255	7580	29.725	0.395	255	7580		0.034
A10	A10.tiff	44	560	12.727	0.029	255	3245.45		0.079
A11	A11.tiff	67	1022	15.254	0.053	255	3889.7		0.066
A12	A12.tiff	107	1569	14.664	0.082	255	3739.21		0.068
A13	A13.tiff	112	2339	20.884	0.122	255	5325.4		0.048
A14	A14.tiff	77	734	9.532	0.038	255	2430.78		0.105
A15	A15.tiff	134	5309	39.619	0.277	255	10102.9		0.025
A16	A16.tiff	202	8072	39.96	0.42	255	10189.9		0.025
A17	A17.tiff	36	355	9.861	0.018	255	2514.58		0.101
A18	A18.tiff	141	3785	26.844	0.197	255	6845.21		0.037
A19	A19.tiff	85	1333	15.682	0.069	255	3999		0.064
A20	A20.tiff	27	604	22.37	0.031	255	5704.44		0.045
AVERAGE				20.72
SD				9.47068
SEM				2.1
Image	Slice	Count	Total area	Average Size	% Area	Mean	IntDen		Count/Total Area
B1	B1.tiff	97	1267	13.062	0.066	255	3330.77		0.077
Β2	B2.tiff	70	801	11.443	0.042	255	2917.93		0.087
Β3	B3.tiff	17	291	17.118	0.015	255	4365		0.058
B4	B4.tiff	294	6599	22.446	0.344	255	5723.62		0.045
B5	B5.tiff	73	1164	15.945	0.061	255	4066.03		0.063
B6	B6.tiff	48	2023	42.146	0.105	255	10747.2		0.024
B7	B7.tiff	222	10491	47.257	0.546	255	12050.5		0.021
B8	B8.tiff	75	2050	27.333	0.107	255	6970		0.037
B9	B9.tiff	61	1946	31.902	0.101	255	8134.92		0.031
B10	B10.tiff	62	1361	21.952	0.071	255	5597.66		0.046
B11	B11.tiff	95	3139	33.042	0.163	255	8425.74		0.03
B12	B12.tiff	187	3471	18.561	0.181	255	4733.18		0.054
B13	B13.tiff	152	3964	26.079	0.206	255	6650.13		0.038
B14	B14.tiff	81	3525	43.519	0.184	255	11097.2		0.023
B15	B15.tiff	608	14614	24.036	0.761	255	6129.23		0.042
B16	B16.tiff	75	1031	13.747	0.054	255	3505.4		0.073
B17	B17.tiff	77	1757	22.818	0.092	255	5818.64		0.044
B18	B18.tiff	117	2408	20.581	0.125	255	5248.2		0.049
B19	B19.tiff	437	17097	39.124	0.89	255	9976.51		0.026
B21	B21.tiff	152	8494	55.882	0.442	255	14249.8		0.018
B20	same as B11
AVERAGE				27.3996
SD				12.5001
SEM				2.8
Image	Slice	Count	Total area	Average Size	% Area	Mean	IntDen		Count/Total Area
C1	C1.tiff	1044	30728	29.433	1.6	255	7505.4		0.034
C2	C2.tiff	75	4548	60.64	0.237	255	15463.2		0.016
C3	C3.tiff	93	1887	20.29	0.098	255	5174.03		0.049
C4	C4.tiff	146	1502	10.288	0.078	255	2623.36		0.097
C5	C5.tiff	30	653	21.767	0.034	255	5550.5		0.046
C6	C6.tiff	42	1768	42.095	0.092	255	10734.3		0.024
C7	C7.tiff	87	2033	23.368	0.106	255	5958.79		0.043
C8	C8.tiff	111	1757	15.829	0.092	255	4036.35		0.063
C9	C9.tiff	138	2810	20.362	0.146	255	5192.39		0.049
C10	C10.tiff	306	3770	12.32	0.196	255	3141.67		0.081
C11	C11.tiff	58	916	15.793	0.048	255	4027.24		0.063
C12	C12.tiff	103	1662	16.136	0.087	255	4114.66		0.062
C13	C13.tiff	81	4597	56.753	0.239	255	14472		0.018
C14	C14.tiff	154	2984	19.377	0.155	255	4941.04		0.052
C15	C15.tiff	206	2708	13.146	0.141	255	3352.14		0.076
C16	C16.tiff	117	4487	38.35	0.234	255	9779.36		0.026
C17	C17.tiff	88	2341	26.602	0.122	255	6783.58		0.038
C18	C18.tiff	68	1041	15.309	0.054	255	3903.75		0.065
C19	C19.tiff	290	5217	17.99	0.272	255	4587.36		0.056
AVERAGE				25.0446
SD				14.4679
SEM				3.3
Image	Slice	Count	Total area	Average Size	% Area	Mean	IntDen		Count/Total Area
D1	D1.tiff	104	3183	30.606	0.166	255	7804.47		0.033
D2	D2.tiff	128	4470	34.922	0.233	255	8905.08		0.029
D3	D3.tiff	44	650	14.773	0.034	255	3767.05		0.068
D4	D4.tiff	54	602	11.148	0.031	255	2842.78		0.09
D5	D5.tiff	91	1504	16.527	0.078	255	4214.51		0.061
D6	D6.tiff	91	1149	12.626	0.06	255	3219.72		0.079
D7	D7.tiff	83	1128	13.59	0.059	255	3465.54		0.074
D8	D8.tiff	85	1861	21.894	0.097	255	5583		0.046
D9	D9.tiff	84	1594	18.976	0.083	255	4838.93		0.053
D10	D10.tiff	184	3616	19.652	0.188	255	5011.3		0.051
D11	D11.tiff	32	295	9.219	0.015	255	2350.78		0.108
D12	D12.tiff	140	1144	8.171	0.06	255	2083.71		0.122
D13	D13.tiff	161	1780	11.056	0.093	255	2819.26		0.09
D14	D14.tiff	185	3142	16.984	0.164	255	4330.86		0.059
D15	D15.tiff	111	1049	9.45	0.055	255	2409.86		0.106
D16	D16.tiff	146	3002	20.562	0.156	255	5243.22		0.049
D17	D17.tiff	71	1750	24.648	0.091	255	6285.21		0.041
D18	D18.tiff	110	1796	16.327	0.094	255	4163.45		0.061
AVERAGE				17.2851
SD				7.32602
SEM				1.7
	Wild-type	TCS	C922S/C923S	full CS
AVERAGE	17.2851	25.0446	20.72	27.3996
SEM	1.7	3.3	2.1	2.8
January 17th 2022
EK/SM 12-18-15 flag-Npn2 CS_COS7_live staining, File name: "SM12.18.15Npn2CScos7"
Particle analysis: Image>Type: 8-bit, Image>Adjust>Threshold, Process>Binary>Make Binary, Edit>Selection>Create Mask, Analyze>Analyze Particles (size in sq. um: 0-infinity, circularity: 0.00-1.00, display results, summarize, in situ show)
Scale: same scale applied as in 2-BP experiments of 6.22.15 and 6.26.15, Scale for 40X: 270 pixels/50 μm or 5.400 pixels/μm.
Frames analyzed: 1024 x 1024 (cropped), 189.63 x 189.63 μm						A=C922S/C923S
						B=full CS
						C=TCS
						D=WT
C922S/C923S
Image	Slice	Count	Total area	Average Size	% Area	IntDen	Skew	Min Area	Max Area	Count/Total Area
A1	A1	52	44.067	0.847	0.123	216.099	NaN	0.034	7.819	1.18
A2	A2	82	35.357	0.431	0.098	109.951	NaN	0.034	3.189	2.319
A3	A3	122	72.325	0.593	0.201	151.171	NaN	0.034	31.447	1.687
A4	A4	94	67.936	0.723	0.189	184.293	NaN	0.034	7.922	1.384
A5	A5	77	66.495	0.864	0.185	220.211	NaN	0.034	21.399	1.158
A6	A6	125	51.097	0.409	0.142	104.239	NaN	0.034	6.584	2.446
A7	A7	59	58.539	0.992	0.163	253.008	NaN	0.034	14.986	1.008
A8	A8	109	88.34	0.81	0.246	206.667	NaN	0.034	14.746	1.234
A9	A9	248	255.11	1.029	0.709	262.31	NaN	0.034	100.926	0.972
A10	A10	121	81.036	0.67	0.225	170.778	NaN	0.034	10.185	1.493
A11	A11	91	51.886	0.57	0.144	145.395	NaN	0.034	15.295	1.754
A12	A12	126	83.608	0.664	0.233	169.206	NaN	0.034	17.97	1.507
A13	A13	159	163.855	1.031	0.456	262.786	NaN	0.034	15.947	0.97
A14	A14	107	59.945	0.56	0.167	142.86	NaN	0.034	3.944	1.785
A15	A15	106	141.358	1.334	0.393	340.059	NaN	0.034	37.723	0.75
A16	A16	264	378.018	1.432	1.051	365.131	NaN	0.034	65.501	0.698
A17	A17	50	20.302	0.406	0.056	103.539	NaN	0.034	2.915	2.463
A18	A18	146	136.968	0.938	0.381	239.226	NaN	0.034	18.827	1.066
A19	A19	61	34.534	0.566	0.096	144.362	NaN	0.034	6.036	1.766
A20	A20	30	38.786	1.293	0.108	329.681	NaN	0.034	10.974	0.773
										1.42065
Full CS
Image	Slice	Count	Total area	Average Size	% Area	IntDen	Skew	Min Area	Max Area	Count/Total Area
B1	B1	109	66.187	0.607	0.184	154.84	NaN	0.034	12.037	1.647
Β2	B2	180	74.28	0.413	0.207	105.23	NaN	0.034	10.734	2.423
Β3	B3	149	55.796	0.374	0.155	95.489	NaN	0.034	15.295	2.67
B4	B4	457	489.746	1.072	1.362	273.272	NaN	0.034	35.631	0.933
B5	B5	128	98.422	0.769	0.274	196.076	NaN	0.034	17.73	1.301
B6	B6	116	307.167	2.648	0.854	675.239	NaN	0.034	225.171	0.378
B7	B7	213	335.082	1.573	0.932	401.155	NaN	0.034	61.111	0.636
B8	B8	48	45.13	0.94	0.126	239.755	NaN	0.034	12.037	1.064
B9	B9	52	70.885	1.363	0.197	347.608	NaN	0.034	11.9	0.734
B10	B10	145	93.107	0.642	0.259	163.74	NaN	0.034	23.354	1.557
B11	B11	130	143.073	1.101	0.398	280.643	NaN	0.034	36.385	0.909
B12	B12	414	393.038	0.949	1.093	242.089	NaN	0.034	55.796	1.053
B13	B13	287	302.469	1.054	0.841	268.744	NaN	0.034	28.258	0.949
B14	B14	122	232.305	1.904	0.646	485.555	NaN	0.034	127.332	0.525
B15	B15	729	768.244	1.054	2.136	268.727	NaN	0.034	38.957	0.949
B16	B16	322	239.815	0.745	0.667	189.915	NaN	0.034	31.653	1.343
B17	B17	100	88.306	0.883	0.246	225.18	NaN	0.034	21.056	1.132
B18	B18	126	106.31	0.844	0.296	215.151	NaN	0.034	22.119	1.185
B19	B19	398	421.536	1.059	1.172	270.08	NaN	0.034	112.277	0.944
B21	B21	151	301.166	1.994	0.838	508.592	NaN	0.034	123.56	0.501
										1.14165
TCS
Image	Slice	Count	Total area	Average Size	% Area	IntDen	Skew	Min Area	Max Area	Count/Total Area
C1	C1	478	333.745	0.698	0.928	178.044	NaN	0.034	31.036	1.432
C2	C2	163	296.399	1.818	0.824	463.692	NaN	0.034	91.118	0.55
C3	C3	182	188.786	1.037	0.525	264.508	NaN	0.034	47.359	0.964
C4	C4	177	101.852	0.575	0.283	146.736	NaN	0.034	5.487	1.738
C5	C5	80	54.973	0.687	0.153	175.225	NaN	0.034	16.564	1.455
C6	C6	76	160.94	2.118	0.448	539.995	NaN	0.034	75.24	0.472
C7	C7	92	81.344	0.884	0.226	225.465	NaN	0.034	16.632	1.131
C8 left	C8 left	105	73.251	0.698	0.204	177.895	NaN	0.034	9.122	1.433
C9	C9	151	179.733	1.19	0.5	303.522	NaN	0.034	62.826	0.84
C10	C10	674	434.088	0.644	1.207	164.232	NaN	0.034	64.438	1.553
C11	C11	92	56.447	0.614	0.157	156.457	NaN	0.034	4.561	1.63
C12	C12	264	227.332	0.861	0.632	219.582	NaN	0.034	24.931	1.161
C13	C13	89	243.176	2.732	0.676	696.739	NaN	0.034	168.587	0.366
C14	C14	200	182.064	0.91	0.506	232.132	NaN	0.034	37.826	1.099
C15	C15	253	135.048	0.534	0.376	136.116	NaN	0.034	13.58	1.873
C16	C16	124	239.575	1.932	0.666	492.674	NaN	0.034	32.819	0.518
C17	C17	168	194.479	1.158	0.541	295.191	NaN	0.034	27.641	0.864
C18	C18	111	54.698	0.493	0.152	125.658	NaN	0.034	13.82	2.029
C19	C19	338	254.698	0.754	0.708	192.154	NaN	0.034	27.984	1.327
C8 right	C8 right	46	32.373	0.704	0.09	179.46	NaN	0.034	8.162	1.421
										1.1928
WT
Image	Slice	Count	Total area	Average Size	% Area	IntDen	Skew	Min Area	Max Area	Count/Total Area
D1	D1	98	92.318	0.942	0.257	240.216	NaN	0.034	21.056	1.062
D2	D2	132	182.647	1.384	0.508	352.842	NaN	0.034	16.907	0.723
D3	D3	41	21.502	0.524	0.06	133.732	NaN	0.034	3.567	1.907
D4	D4	234	159.053	0.68	0.442	173.328	NaN	0.034	17.284	1.471
D5	D5	74	40.947	0.553	0.114	141.099	NaN	0.034	8.299	1.807
D6	D6	100	45.13	0.451	0.126	115.082	NaN	0.034	9.396	2.216
D7	D7	164	107.785	0.657	0.301	167.592	NaN	0.034	17.215	1.522
D8	D8	61	43.381	0.711	0.121	181.348	NaN	0.034	3.841	1.406
D9	D9	71	43.313	0.61	0.12	155.56	NaN	0.034	6.31	1.639
D10	D10	125	53.018	0.424	0.147	108.156	NaN	0.034	3.909	2.358
D11	D11	57	21.948	0.385	0.061	98.188	NaN	0.034	4.047	2.597
D12	D12	177	56.859	0.321	0.158	81.915	NaN	0.034	2.263	3.113
D13	D13	146	53.738	0.368	0.149	93.857	NaN	0.034	5.35	2.717
D14	D14	145	76.2	0.526	0.212	134.007	NaN	0.034	6.653	1.903
D15 left	D15 left	123	37.174	0.302	0.103	77.068	NaN	0.034	4.938	3.309
D16	D16	124	146.502	1.181	0.407	301.274	NaN	0.034	49.28	0.846
D17	D17	73	70.61	0.967	0.196	246.653	NaN	0.034	16.049	1.034
D18 upper	D18	48	27.881	0.581	0.078	148.116	NaN	0.034	6.584	1.722
D15 right	D15 right	37	18.69	0.505	0.052	128.809	NaN	0.034	4.252	1.98
D18 lower	D18 lower	40	17.181	0.43	0.048	109.529	NaN	0.034	3.361	2.328
										1.883
