# Supplementary material for: Palmitoylation regulates neuropilin-2 localization and function in cortical neurons and conveys specificity to semaphorin signaling via palmitoyl acyltransferases
Source: eLife. 2023 Apr 3;12:e83217. doi: 10.7554/eLife.83217 (PMC10069869; doi:10.7554/eLife.83217)
Supplement: Figure 3—figure supplement 4—source data 9. [file elife-83217-fig3-figsupp4-data9.xlsx]

## Sheet: Sheet1
Npn-2/plexinA3 coIP (first-mine)			w=0.23, h=0.29	film of 11-24-12 film(2)
	PlexinA3 signal 	IP (plexinA3)	Input (plexinA3)	IP/Input (plexinA3)	Normalized
	Npn-2 WT+plexinA3	44481.1	51883.2	0.857331	1
	Npn-2 full CS+plexinA3	45230.2	57008.8	0.793389	0.925418
	Backbone vector+plexinA3	9663.09	68125	0.141844	0.165448
Npn-2/plexinA3 coIP (second-Sarah's first)		cropped: w=80, h=45	film of
	PlexinA3 signal 	IP (plexinA3)	Input (plexinA3)	IP/Input (plexinA3)	Normalized
	Npn-2 WT+plexinA3	11946.3	20444	0.584342	1
	Npn-2 full CS+plexinA3	15815.3	15761.4	1.00342	1.71718
	Backbone vector+plexinA3	2800.28	23576.3	0.118775	0.203263
Npn-2/plexinA3 coIP (third-Sarah's second)		cropped: w=0.30, h=0.16	film of 3-25-16	4.7.16plexCoIP
	PlexinA3 signal 	IP (plexinA3)	Input (plexinA3)	IP/Input (plexinA3)	Normalized
	Npn-2 WT+plexinA3	18033.1	47162.4	0.382362	1
	Npn-2 full CS+plexinA3	13933.8	42483.6	0.327982	0.857777
	Backbone vector+plexinA3	2866.26	43080.9	0.0665319	0.174002
