# Supplementary material for: Palmitoylation regulates neuropilin-2 localization and function in cortical neurons and conveys specificity to semaphorin signaling via palmitoyl acyltransferases
Source: eLife. 2023 Apr 3;12:e83217. doi: 10.7554/eLife.83217 (PMC10069869; doi:10.7554/eLife.83217)
Supplement: Figure 3—figure supplement 4—source data 16. [file elife-83217-fig3-figsupp4-data16.xlsx]

## Sheet: Sheet1
EK Npn-2 homodimerization analysis_Cumulative
IP: Flag-Npn2 WT with FLAG Ab
quantification of pHNpn-2 WT vs full CS
Experiment 1, w=0.21, h=0.15
	IP	Input	IP/Input	Normalized
WT	28924.4	16022	1.80529	1
Full CS	24301.8	24870.5	0.977134	0.541262
Experiment 2
	IP	Input	IP/Input	Normalized
WT	29564.6	15079.3	1.96061	1
Full CS	25983.1	24300.8	1.06923	0.545356
