# Supplementary material for: Palmitoylation regulates neuropilin-2 localization and function in cortical neurons and conveys specificity to semaphorin signaling via palmitoyl acyltransferases
Source: eLife. 2023 Apr 3;12:e83217. doi: 10.7554/eLife.83217 (PMC10069869; doi:10.7554/eLife.83217)
Supplement: Figure 3—figure supplement 4—source data 23. [file elife-83217-fig3-figsupp4-data23.xlsx]

## Sheet: Sheet1
Npn-2 homodimerization experiments_pHWT vs pHTCS with Flag-Npn-2 WT_Quantification
GFP signal quantification
w=0.23, h=0.15, blot of 7-13-16, film: 7-15-16dimerization-GFP-2
REPEAT 1	IP	Input	IP/Input	Normalized
WT	16346.4	19833.4	0.824184	1
TCS	4237.57	9244.37	0.458395	0.55618
REPEAT 2	IP	Input	IP/Input	Normalized
WT	16511.1	14149.4	1.16691	1
TCS	20524.3	23707.3	0.86574	0.741907
