# Supplementary material for: Palmitoylation regulates neuropilin-2 localization and function in cortical neurons and conveys specificity to semaphorin signaling via palmitoyl acyltransferases
Source: eLife. 2023 Apr 3;12:e83217. doi: 10.7554/eLife.83217 (PMC10069869; doi:10.7554/eLife.83217)
Supplement: Figure 3—source data 1. [file elife-83217-fig3-data1.xlsx]

## Sheet: Sheet1
SM 12-28-15 pHluorin-Npn2 CS_COS7_live staining. File name: "SM12.28.15.pHcos7"
PARTICLE ANALYSIS performed on January 25th 2022
Particle analysis: Image>Type: 8-bit, Image>Adjust>Threshold, Process>Binary>Make Binary, Edit>Selection>Create Mask, Analyze>Analyze Particles (size in sq. um: 0-infinity, circularity: 0.00-1.00, display results, summarize, in situ show)
Scale: Scale for 40X: 270 pixels/50 μm or 5.400 pixels/μm.
Frames analyzed: 1024 x 1024 (cropped), 189.63 x 189.63 μm
pHluorin-Npn2 WT_dsRED
Image	Count	Total area	Average Size	% Area	IntDen	Skew	Min Area	Max Area	Count/Total Area
Npn2WT1	174	77.812	0.447	0.216	114.035	NaN	0.034	8.985	2.236
Npn2WT2	213	199.211	0.935	0.554	238.492	NaN	0.034	37.037	1.069
Npn2WT3	90	31.447	0.349	0.087	89.1	NaN	0.034	4.767	2.862
Npn2WT4	399	172.634	0.433	0.48	110.33	NaN	0.034	19.067	2.311
Npn2WT5	193	106.756	0.553	0.297	141.05	NaN	0.034	12.003	1.808
Npn2WT6	76	83.368	1.097	0.232	279.72	NaN	0.034	21.193	0.912
Npn2WT7	119	39.026	0.328	0.109	83.627	NaN	0.034	3.464	3.049
Npn2WT8	185	99.76	0.539	0.277	137.507	NaN	0.034	20.302	1.854
Npn2WT9	494	189.815	0.384	0.528	97.981	NaN	0.034	22.84	2.603
Npn2WT10	347	252.743	0.728	0.703	185.734	NaN	0.034	40.912	1.373
Npn2WT11	213	155.281	0.729	0.432	185.9	NaN	0.034	14.335	1.372
Npn2WT12	441	205.178	0.465	0.571	118.641	NaN	0.034	26.92	2.149
Npn2WT13	355	312.414	0.88	0.869	224.41	NaN	0.034	31.859	1.136
Npn2WT14	222	69.307	0.312	0.193	79.61	NaN	0.034	4.218	3.203
Npn2WT15	239	136.831	0.573	0.381	145.992	NaN	0.034	20.85	1.747
Npn2WT16	198	118.141	0.597	0.329	152.152	NaN	0.034	11.42	1.676
Npn2WT17	170	25.446	0.15	0.071	38.169	NaN	0.034	1.475	6.681
Npn2WT18	237	222.977	0.941	0.62	239.912	NaN	0.034	48.8	1.063
Npn2WT19	231	343.587	1.487	0.955	379.284	NaN	0.034	93.038	0.672
Npn2WT20	353	235.185	0.666	0.654	169.893	NaN	0.034	19.17	1.501
			0.62965						2.06385
pHluorin-Npn2TCS_dsRED
Image	Count	Total area	Average Size	% Area	IntDen	Skew	Min Area	Max Area	Count/Total Area
Npn2TCS1	266	179.355	0.674	0.499	171.938	NaN	0.034	35.7	1.483
Npn2TCS2	266	296.262	1.114	0.824	284.011	NaN	0.034	98.251	0.898
Npn2TCS3	146	62.311	0.427	0.173	108.832	NaN	0.034	10.391	2.343
Npn2TCS4	183	228.944	1.251	0.637	319.02	NaN	0.034	125.995	0.799
Npn2TCS5	115	66.872	0.581	0.186	148.282	NaN	0.034	17.764	1.72
Npn2TCS6	278	270.61	0.973	0.753	248.222	NaN	0.034	37.689	1.027
Npn2TCS7	307	290.741	0.947	0.809	241.495	NaN	0.034	59.294	1.056
Npn2TCS8	62	176.852	2.852	0.492	727.375	NaN	0.034	43.587	0.351
Npn2TCS9	137	87.346	0.638	0.243	162.578	NaN	0.034	46.262	1.568
Npn2TCS10	199	110.151	0.554	0.306	141.148	NaN	0.034	17.901	1.807
Npn2TCS11	245	255.007	1.041	0.709	265.415	NaN	0.034	34.636	0.961
Npn2TCS12	72	60.562	0.841	0.168	214.492	NaN	0.034	14.403	1.189
Npn2TCS13	104	92.284	0.887	0.257	226.273	NaN	0.034	22.222	1.127
Npn2TCS14	216	377.812	1.749	1.051	446.028	NaN	0.034	56.584	0.572
Npn2TCS15	112	75.926	0.678	0.211	172.867	NaN	0.034	19.102	1.475
Npn2TCS16	133	78.189	0.588	0.217	149.912	NaN	0.034	9.465	1.701
Npn2TCS17	114	35.528	0.312	0.099	79.471	NaN	0.034	3.429	3.209
Npn2TCS18	588	626.749	1.066	1.743	271.804	NaN	0.034	141.289	0.938
Npn2TCS19	122	101.612	0.833	0.283	212.385	NaN	0.034	13.957	1.201
Npn2TCS20	238	216.598	0.91	0.602	232.069	NaN	0.034	36.9	1.099
			0.9458						1.3262
pHluorin-Npn2 C922S/C923S_dsRED
Image	Count	Total area	Average Size	% Area	IntDen	Skew	Min Area	Max Area	Count/Total Area
Npn2CtermCS1	250	441.872	1.767	1.229	450.71	NaN	0.034	193.038	0.566
Npn2CtermCS2	196	138.169	0.705	0.384	179.76	NaN	0.034	16.804	1.419
Npn2CtermCS3	150	149.143	0.994	0.415	253.543	NaN	0.034	87.14	1.006
Npn2CtermCS4	130	38.683	0.298	0.108	75.878	NaN	0.034	4.733	3.361
Npn2CtermCS5	200	180.453	0.902	0.502	230.077	NaN	0.034	20.885	1.108
Npn2CtermCS6	90	137.551	1.528	0.383	389.729	NaN	0.034	60.288	0.654
Npn2CtermCS7	143	114.472	0.801	0.318	204.128	NaN	0.034	40.604	1.249
Npn2CtermCS8	181	136.934	0.757	0.381	192.918	NaN	0.034	14.129	1.322
Npn2CtermCS9	241	311.454	1.292	0.866	329.547	NaN	0.034	52.469	0.774
Npn2CtermCS10	121	102.709	0.849	0.286	216.453	NaN	0.034	23.903	1.178
Npn2CtermCS11	85	30.658	0.361	0.085	91.975	NaN	0.034	5.83	2.773
Npn2CtermCS12	119	106.927	0.899	0.297	229.13	NaN	0.034	18.793	1.113
Npn2CtermCS13	151	70.439	0.466	0.196	118.953	NaN	0.034	9.671	2.144
Npn2CtermCS14	258	286.454	1.11	0.797	283.123	NaN	0.034	34.774	0.901
Npn2CtermCS15	267	129.561	0.485	0.36	123.738	NaN	0.034	6.344	2.061
Npn2CtermCS16	127	93.416	0.736	0.26	187.567	NaN	0.034	10.288	1.36
Npn2CtermCS17	176	45.062	0.256	0.125	65.288	NaN	0.034	5.59	3.906
Npn2CtermCS18	102	66.907	0.656	0.186	167.267	NaN	0.034	12.243	1.525
Npn2CtermCS19	337	206.31	0.612	0.574	156.11	NaN	0.034	24.863	1.633
Npn2CtermCS20	102	54.801	0.537	0.152	137.003	NaN	0.034	12.311	1.861
			0.80055						1.5957
pHluorin-Npn2 FullCS_dsRED
Image	Count	Total area	Average Size	% Area	IntDen	Skew	Min Area	Max Area	Count/Total Area
Npn2fullCS1	67	31.55	0.471	0.088	120.079	NaN	0.034	7.99	2.124
Npn2fullCS2	51	81.653	1.601	0.227	408.265	NaN	0.034	35.837	0.625
Npn2fullCS3	78	86.351	1.107	0.24	282.302	NaN	0.034	10.905	0.903
Npn2fullCS4	56	66.564	1.189	0.185	303.103	NaN	0.034	21.776	0.841
Npn2fullCS5	121	44.273	0.366	0.123	93.303	NaN	0.034	3.601	2.733
Npn2fullCS6	124	53.978	0.435	0.15	111.003	NaN	0.034	3.909	2.297
Npn2fullCS7	65	35.288	0.543	0.098	138.438	NaN	0.034	16.324	1.842
Npn2fullCS8	218	97.908	0.449	0.272	114.526	NaN	0.034	10.288	2.227
Npn2fullCS9	116	107.785	0.929	0.3	236.94	NaN	0.034	17.318	1.076
Npn2fullCS10	395	468.313	1.186	1.302	302.328	NaN	0.034	38.923	0.843
Npn2fullCS11	279	386.626	1.386	1.075	353.367	NaN	0.034	67.044	0.722
Npn2fullCS12	264	338.032	1.28	0.94	326.508	NaN	0.034	107.853	0.781
Npn2fullCS13	209	249.52	1.194	0.694	304.438	NaN	0.034	35.94	0.838
Npn2fullCS14	143	87.586	0.612	0.244	156.184	NaN	0.034	17.73	1.633
Npn2fullCS15	333	342.284	1.028	0.952	262.109	NaN	0.034	29.698	0.973
Npn2fullCS16	80	165.535	2.069	0.46	527.643	NaN	0.034	20.816	0.483
Npn2fullCS17	108	83.093	0.769	0.231	196.192	NaN	0.034	19.444	1.3
Npn2fullCS18	176	87.929	0.5	0.245	127.397	NaN	0.034	10.425	2.002
Npn2fullCS19	183	163.477	0.893	0.455	227.796	NaN	0.034	23.182	1.119
Npn2fullCS20	488	381.276	0.781	1.06	199.232	NaN	0.034	34.499	1.28
			0.9394						1.3321
