# Supplementary material for: Palmitoylation regulates neuropilin-2 localization and function in cortical neurons and conveys specificity to semaphorin signaling via palmitoyl acyltransferases
Source: eLife. 2023 Apr 3;12:e83217. doi: 10.7554/eLife.83217 (PMC10069869; doi:10.7554/eLife.83217)
Supplement: Figure 3—source data 2. [file elife-83217-fig3-data2.xlsx]

## Sheet: Sheet1
EK 4-7-15 Npn2KO pHNpn2 WT			Scale: 6.398 pixels/μm
a square 30.01 x 30.01 cropped from the zoom=1 image, then 30.01x30.01μm (192x192)
Threshold Npn2=230, Threshold GM130=181
	Area	Area
	GM130	Colocalized	coloc/GM130
Image	AGolgi	AGolgi-Npn2	AGolgi-Npn2/AGolgi	ANpn2		AGolgi-Npn2/ANpn2		[AGolgi-Npn2/ANpn2]/AGolgi
WT#1 zoom=1(new crop square)	42.216	37.501	0.888312	146.069	embryo 2	0.256735		0.00608146
WT#2 zoom=1(new crop square)	33.421	28.339	0.84794	61.1	embryo 2	0.463813		0.0138779
WT#3 zoom=1(new crop square)	54.871	4.226	0.077017	16.955	embryo 2	0.249248		0.00454244
WT#4 zoom=1(new crop square)	19.862	18.64	0.938475	77.053	embryo 2	0.241911		0.0121796
WT#5 zoom=1(new crop square)	10.823	8.966	0.828421	33.665	embryo 2	0.26633		0.0246078
WT#6 zoom=1(new crop square)	41.58	27.899	0.670972	131.509	embryo 2	0.212145		0.0051021
WT#7 zoom=1(new crop square)	20.131	17.175	0.853162	66.719	embryo 2	0.257423		0.0127874
WT#8 zoom=1(new crop square)	22.818	3.005	0.131694	5.595	embryo 2	0.537087		0.0235379
WT#9 zoom=1(new crop square)	35.571	14.243	0.40041	49.3	embryo 2	0.288905		0.00812192
WT#10zoom=1(new crop square	31.906	22.965	0.719771	65.937	embryo 2	0.348287		0.010916
WT#11zoom=1(new crop square	25.652	19.153	0.746647	40.994	embryo 2	0.467215		0.0182136
WT#12zoom=1(new crop square	19.153	16.515	0.862267	47.59	embryo 2	0.347027		0.0181187
WT#1 zoom=1(new crop square	22.965	8.575	0.373394	28.07	embryo 3	0.305486		0.0133023
WT#2 zoom=1(new crop square	16.197	12.924	0.797926	49.105	embryo 3	0.263191		0.0162494
WT#3 zoom=1(new crop square	30.758	19.153	0.6227	41.532	embryo 3	0.461162		0.0149933
WT#4 zoom=1(new crop square	46.955	30.049	0.639953	54.138	embryo 3	0.555045		0.0118208
WT#5 zoom=1(new crop square	47.737	22.183	0.464692	47.859	embryo 3	0.463507		0.0097096
WT#6 zoom=1(new crop square	83.796	36.132	0.43119	79.105	embryo 3	0.45676		0.00545086
WT#7 zoom=1(new crop square	33.005	22.207	0.672837	56.239	embryo 3	0.394868		0.0119639
WT#8 zoom=1(new crop square	64.863	31.466	0.485115	162.608	embryo 3	0.193508		0.00298334
WT#9 zoom=1(new crop square	58.926	44.585	0.756627	131.044	embryo 3	0.340229		0.00577384
WT#10zoom=1(new crop square	22.989	13.681	0.595111	29.512	embryo 3	0.463574		0.020165
WT#11zoom=1(new crop square	20.253	14.585	0.72014	44.659	embryo 3	0.326586		0.0161253
WT#12zoom=1(new crop square	37.72	30.733	0.814767	85.628	embryo 3	0.358913		0.00951519
WT#13zoom=1(new crop square	55.726	35.106	0.629975	78.495	embryo 3	0.447239		0.00802567
WT#14zoom=1(new crop square	35.766	29.878	0.835374	59.097	embryo 3	0.505576		0.0141356
WT#1 zoom=1(new crop square	35.204	6.743	0.191541	15.489	embryo 6	0.435341		0.0123662
WT#2 zoom=1(new crop square	20.839	18.03	0.865205	46.906	embryo 6	0.384386		0.0184455
WT#3 zoom=1(new crop square	56.801	41.19	0.725163	89.83	embryo 6	0.458533		0.00807262
WT#4 zoom=1(new crop square	39.992	24.333	0.608447	73.438	embryo 6	0.331341		0.00828518
WT#5 zoom=1(new crop square	45.44	27.948	0.615053	44.268	embryo 6	0.631336		0.0138938
WT#6 zoom=1(new crop square	21.108	13.046	0.61806	29.194	embryo 6	0.446873		0.0211708
WT#7 zoom=1(new crop square	28.535	7.525	0.263711	14.707	embryo 6	0.511661		0.017931
WT#8 zoom=1(new crop square	21.352	19.08	0.893593	47.981	embryo 6	0.397657		0.0186239
WT#9 zoom=1(new crop square	42.778	36.328	0.849222	123.056	embryo 6	0.295215		0.0069011
WT#10zoom=1(new crop square	36.67	10.578	0.288465	16.71	embryo 6	0.633034		0.017263
Average			0.631204	60.8654		0.38881		0.0128126
STDEV			0.232624			0.114511		0.00560989
SEM			0.0387706			0.0190852		0.000934981
EK 4-7-15 Npn2KO pHNpn2 full CS			Scale: 6.398 pixels/μm
a square 30.01 x 30.01 cropped from the zoom=1 image, then 30.01x30.01μm (192x192)
Threshold Npn2=230, Threshold GM130=181
	Area	Area
	GM130	Colocalized	coloc/GM130
Image	AGolgi	AGolgi-Npn2	AGolgi-Npn2/AGolgi	ANpn2		AGolgi-Npn2/ANpn2		[AGolgi-Npn2/ANpn2]/AGolgi
full CS#1 zoom=1(new crop sq)	28.266	8.917	0.315467	107.567	embryo 2	0.0828972		0.00293275
full CS#2 zoom=1(new crop sq)	44.732	19.373	0.43309	47.175	embryo 2	0.410662		0.00918051
full CS#3 zoom=1(new crop sq)	16.955	13.217	0.779534	110.327	embryo 2	0.119798		0.00706567
full CS#4 zoom=1(new crop sq)	45.563	17.663	0.387661	50.278	embryo 2	0.351307		0.00771035
full CS#5 zoom=1(new crop sq)	66.939	46.027	0.687596	109.326	embryo 2	0.421007		0.00628941
full CS#6 zoom=1(new crop sq)	53.356	9.284	0.174001	22.696	embryo 2	0.409059		0.0076666
full CS#7 zoom=1(new crop sq)	42.093	27.924	0.663388	93.959	embryo 2	0.297193		0.0070604
full CS#8 zoom=1(new crop sq)	55.823	25.237	0.45209	71.166	embryo 2	0.354622		0.00635261
full CS#9 zoom=1(new crop sq)	61.051	23.844	0.390559	71.288	embryo 2	0.334474		0.0054786
full CS#10 zoom=1(new crop sq)	107.665	23.453	0.217833	141.476	embryo 2	0.165774		0.00153972
full CS#11 zoom=1(new crop sq)	54.626	22.525	0.412349	66.475	embryo 2	0.338849		0.00620308
full CS#12 zoom=1(new crop sq)	18.543	14.365	0.774686	38.331	embryo 2	0.374762		0.0202104
full CS#13 zoom=1(new crop sq)	35.522	23.16	0.65199	43.144	embryo 2	0.536807		0.015112
full CS#14 zoom=1(new crop sq)	39.137	10.505	0.268416	40.286	embryo 2	0.260761		0.00666276
full CS#15 zoom=1(new crop sq)	62.737	27.069	0.431468	60.05	embryo 2	0.450774		0.00718514
full CS#16 zoom=1(new crop sq)	52.599	38.136	0.725033	135.808	embryo 2	0.280808		0.00533866
full CS#17 zoom=1(new crop sq)	58.169	24.846	0.427135	61.833	embryo 2	0.401824		0.00690788
full CS#18 zoom=1(new crop sq)	59.83	7.964	0.13311	77.688	embryo 2	0.102513		0.0017134
full CS#19 zoom=1(new crop sq)	51.035	14.829	0.290565	97.062	embryo 2	0.152779		0.00299361
full CS#20 zoom=1(new crop sq)	55.897	6.181	0.110578	30.416	embryo 2	0.203215		0.00363553
full CS#21 zoom=1(new crop sq)	47.957	5.399	0.11258	91.76	embryo 2	0.0588383		0.0012269
full CS#22 zoom=1(new crop sq)	31.564	10.676	0.338233	31.198	embryo 2	0.342201		0.0108415
full CS#23 zoom=1(new crop sq)	23.062	0.537	0.0232851	42.533	embryo 2	0.0126255		0.000547459
full CS#24 zoom=1(new crop sq)	22.232	0.928	0.0417416	54.529	embryo 2	0.0170185		0.000765494
full CS#25 zoom=1(new crop sq)	21.132	18.689	0.884393	110.034	embryo 2	0.169848		0.00803746
full CS#26 zoom=1(new crop sq)	14.805	13.876	0.937251	49.252	embryo 2	0.281735		0.0190297
full CS#27 zoom=1(new crop sq)	53.454	4.691	0.0877577	15.88	embryo 2	0.295403		0.0055263
full CS#28 zoom=1(new crop sq)	13.486	8.648	0.641258	58.511	embryo 2	0.147801		0.0109596
full CS#29 zoom=1(new crop sq)	25.041	23.184	0.925842	161.998	embryo 2	0.143113		0.00571514
full CS#30 zoom=1(new crop sq)	28.022	4.617	0.164763	40.481	embryo 2	0.114054		0.00407014
full CS#31 zoom=1(new crop sq)	32.712	7.818	0.238995	30	embryo 2	0.2606		0.0079665
full CS#1 zoom=1(new crop sq)	84.431	18.103	0.214412	23.624	embryo 3	0.766297		0.00907601
full CS#2 zoom=1(new crop sq)	58.706	8.38	0.142745	100.067	embryo 3	0.0837439		0.0014265
full CS#3 zoom=1(new crop sq)	46.76	22.036	0.471257	55.603	embryo 3	0.39631		0.0084754
full CS#4 zoom=1(new crop sq)	31.442	29.121	0.926182	109.277	embryo 3	0.266488		0.00847554
full CS#5 zoom=1(new crop sq)	29.487	23.942	0.811951	106.712	embryo 3	0.224361		0.00760881
full CS#1 zoom=1(new crop sq)	21.328	17.419	0.81672	90.539	embryo 6	0.192392		0.00902064
full CS#2 zoom=1(new crop sq)	29.072	7.867	0.270604	57.998	embryo 6	0.135643		0.00466575
full CS#3 zoom=1(new crop sq)	14.145	9.503	0.671828	17.541	embryo 6	0.541759		0.0383004
full CS#4 zoom=1(new crop sq)	17.614	5.912	0.335642	47.126	embryo 6	0.125451		0.00712223
full CS#5 zoom=1(new crop sq)	61.638	22.207	0.360281	64.643	embryo 6	0.343533		0.0055734
full CS#6 zoom=1(new crop sq)	43.535	15.758	0.361962	77.786	embryo 6	0.202581		0.0046533
full CS#7 zoom=1(new crop sq)	48.03	9.088	0.189215	31.759	embryo 6	0.286155		0.00595784
full CS#8 zoom=1(new crop sq)	39.577	10.969	0.277156	60.783	embryo 6	0.180462		0.00455976
full CS#9 zoom=1(new crop sq)	36.084	5.204	0.144219	15.342	embryo 6	0.3392		0.00940028
full CS#10 zoom=1(new crop sq)	29.463	5.961	0.202322	60.88	embryo 6	0.0979139		0.00332328
full CS#11 zoom=1(new crop sq)	80.767	25.139	0.311253	59.244	embryo 6	0.42433		0.00525375
full CS#12 zoom=1(new crop sq)	46.369	15.391	0.331924	65.327	embryo 6	0.235599		0.00508097
full CS#13 zoom=1(new crop sq)	43.413	11.018	0.253795	32.004	embryo 6	0.344269		0.0079301
full CS#14 zoom=1(new crop sq)	25.823	15.562	0.602641	50.424	embryo 6	0.308623		0.0119515
Average			0.416375			0.267765		0.00739561
STDEV			0.26069			0.14853		0.0059683
SEM			0.0368675			0.0210056		0.000844053
EK 4-7-15 Npn2KO pHNpn2 TCS			Scale: 6.398 pixels/μm
a square 30.01 x 30.01 cropped from the zoom=1 image, then 30.01x30.01μm (192x192)
Threshold Npn2=230, Threshold GM130=181
	Area	Area
	GM130	Colocalized	coloc/GM130
Image	AGolgi	AGolgi-Npn2	AGolgi-Npn2/AGolgi	ANpn2		AGolgi-Npn2/ANpn2		[AGolgi-Npn2/ANpn2]/AGolgi
TCS#1 zoom=1(new crop sq)	57.607	22.94	0.398215	92.982	embryo 2	0.246714		0.00428272
TCS#2 zoom=1(new crop sq)	33.641	10.358	0.307898	55.652	embryo 2	0.186121		0.00553256
TCS#3 zoom=1(new crop sq)	53.478	17.614	0.329369	73.389	embryo 2	0.240009		0.00448799
TCS#4 zoom=1(new crop sq)	52.354	24.43	0.466631	124.546	embryo 2	0.196152		0.00374666
TCS#5 zoom=1(new crop sq)	53.527	30.489	0.5696	86.459	embryo 2	0.352641		0.0065881
TCS#6 zoom=1(new crop sq)	34.373	15.098	0.43924	27.484	embryo 2	0.549338		0.0159817
TCS#7 zoom=1(new crop sq)	27.533	0.635	0.0230632	5.253	embryo 2	0.120883		0.00439049
TCS#8 zoom=1(new crop sq)	39.357	24.479	0.621973	36.303	embryo 2	0.674297		0.0171328
TCS#9 zoom=1(new crop sq)	23.991	0.806	0.0335959	32.663	embryo 2	0.0246762		0.00102856
TCS#10 zoom=1(new crop sq)	39.895	30.049	0.753202	81.329	embryo 2	0.369475		0.00926118
TCS#11 zoom=1(new crop sq)	48.03	33.738	0.702436	146.924	embryo 2	0.229629		0.00478095
TCS#12 zoom=1(new crop sq)	30.318	17.883	0.589848	62.077	embryo 2	0.288078		0.00950187
TCS#13 zoom=1(new crop sq)	38.918	24.064	0.618326	81.891	embryo 2	0.293854		0.00755059
TCS#14 zoom=1(new crop sq)	24.846	23.991	0.965588	64.789	embryo 2	0.370294		0.0149036
TCS#15 zoom=1(new crop sq)	25.31	4.007	0.158317	29.023	embryo 2	0.138063		0.00545488
TCS#1 zoom=1(new crop sq)	68.405	58.413	0.853929	174.188	embryo 3	0.335345		0.00490234
TCS#2 zoom=1(new crop sq)	30.196	0.049	0.00162273	8.502	embryo 3	0.00576335		0.000190865
TCS#3 zoom=1(new crop sq)	30.049	14.658	0.487803	71.825	embryo 3	0.204079		0.00679155
TCS#4 zoom=1(new crop sq)	10.823	0	0	17.37	embryo 3	0		0
TCS#5 zoom=1(new crop sq)	rejected	rejected	rejected	rejected	embryo 3	rejected		rejected
TCS#6 zoom=1(new crop sq)	43.852	42.142	0.961005	105.515	embryo 3	0.399393		0.00910776
TCS#7 zoom=1(new crop sq)	16.295	1.099	0.067444	17.175	embryo 3	0.0639884		0.00392687
TCS#8 zoom=1(new crop sq)	88.658	65.009	0.733256	147.828	embryo 3	0.439761		0.0049602
TCS#9 zoom=1(new crop sq)	20.448	14.414	0.70491	50.155	embryo 3	0.287389		0.0140546
TCS#10 zoom=1(new crop sq)	31.393	10.09	0.321409	35.522	embryo 3	0.284049		0.00904817
TCS#11 zoom=1(new crop sq)	56.483	36.694	0.649647	60.929	embryo 3	0.602242		0.0106624
TCS#1 zoom=1(new crop sq)	38.624	10.261	0.265664	14.951	embryo 6	0.686309		0.017769
TCS#2 zoom=1(new crop sq)	105.221	47.468	0.451127	90.246	embryo 6	0.525985		0.00499886
TCS#3 zoom=1(new crop sq)	22.671	2.467	0.108817	11.409	embryo 6	0.216233		0.00953786
TCS#4 zoom=1(new crop sq)	49.984	41.605	0.832366	115.091	embryo 6	0.361497		0.00723225
TCS#5 zoom=1(new crop sq)	49.691	16.637	0.334809	58.12	embryo 6	0.286253		0.00576065
TCS#6 zoom=1(new crop sq)	64.032	16.686	0.260588	74.635	embryo 6	0.223568		0.0034915
TCS#7 zoom=1(new crop sq)	58.095	16.466	0.283432	48.103	embryo 6	0.342307		0.0058922
TCS#8 zoom=1(new crop sq)	81.964	63.397	0.773474	184.327	embryo 6	0.343938		0.0041962
TCS#9 zoom=1(new crop sq)	rejected	rejected	rejected	rejected	embryo 6	rejected		rejected
TCS#10 zoom=1(new crop sq)	68.136	27.02	0.39656	55.09	embryo 6	0.49047		0.0071984
TCS#11 zoom=1(new crop sq)	68.576	31.564	0.460278	77.737	embryo 6	0.406036		0.00592096
TCS#12 zoom=1(new crop sq)	42.558	36.474	0.857042	66.964	embryo 6	0.544681		0.0127986
TCS#13 zoom=1(new crop sq)	53.991	6.401	0.118557	10.139	embryo 6	0.631325		0.0116931
TCS#14 zoom=1(new crop sq)	40.066	26.336	0.657315	105.27	embryo 6	0.250176		0.00624409
TCS#15 zoom=1(new crop sq)	43.217	37.256	0.862068	90.05	embryo 6	0.413726		0.00957322
TCS#16 zoom=1(new crop sq)	44.023	31.686	0.71976	55.555	embryo 6	0.570354		0.0129558
Average			0.478505	68.6865		0.329877		0.0075883
STDEV			0.285491			0.178237		0.00439748
SEM			0.0440522			0.0275027		0.000695303
EK 4-7-15 Npn2KO pHNpn2 C922S/C923S			Scale: 6.398 pixels/μm
a square 30.01 x 30.01 cropped from the zoom=1 image, then 30.01x30.01μm (192x192)
Threshold Npn2=230, Threshold GM130=181
	Area	Area
	GM130	Colocalized	coloc/GM130
Image	AGolgi	AGolgi-Npn2	AGolgi-Npn2/AGolgi	ANpn2		AGolgi-Npn2/ANpn2		[AGolgi-Npn2/ANpn2]/AGolgi
C922923S#1zoom=1 new crop	42.142	9.186	0.217977	19.276	embryo 2	0.476551		0.0113082
C922923S#2zoom=1 new crop	rejected	rejected	rejected	rejected	embryo 2	rejected		rejected
C922923S#3zoom=1 new crop	32.224	0.586	0.0181852	0.928	embryo 2	0.631466		0.0195961
C922923S#4zoom=1 new crop	6.23	2.687	0.4313	45.734	embryo 2	0.0587528		0.00943062
C922923S#5zoom=1 new crop	22.72	21.67	0.953785	52.476	embryo 2	0.412951		0.0181756
C922923S#6zoom=1 new crop	14.267	7.696	0.539427	18.518	embryo 2	0.415596		0.0291299
C922923S#7zoom=1 new crop	20.79	1.124	0.0540645	6.889	embryo 2	0.163159		0.00784794
C922923S#8zoom=1 new crop	18.201	12.85	0.706005	53.82	embryo 2	0.238759		0.0131179
C922923S#9zoom=1 new crop	17.614	8.551	0.485466	21.401	embryo 2	0.399561		0.0226843
C922923S#10zoom=1 new crop	8.038	1.881	0.234013	6.498	embryo 2	0.289474		0.0360131
C922923S#11zoom=1 new crop	rejected	rejected	rejected	rejected	embryo 2	rejected		rejected
C922923S#12zoom=1 new crop	77.664	28.95	0.37276	100.335	embryo 2	0.288533		0.00371515
C922923S#13zoom=1 new crop	29.048	24.308	0.836822	81.5	embryo 2	0.298258		0.0102678
C922923S#14zoom=1 new crop	83.943	30.367	0.361757	41.874	embryo 2	0.725199		0.00863919
C922923S#15zoom=1 new crop	53.063	27.24	0.513352	50.229	embryo 2	0.542316		0.0102202
C922923S#16zoom=1 new crop	48.03	18.176	0.37843	28.974	embryo 2	0.627321		0.013061
C922923S#17zoom=1 new crop	58.853	20.668	0.35118	36.352	embryo 2	0.568552		0.00966054
C922923S#18zoom=1 new crop	43.51	27.802	0.63898	42.313	embryo 2	0.657056		0.0151013
C922923S#19zoom=1 new crop	25.481	24.675	0.968369	64.594	embryo 2	0.382001		0.0149916
C922923S#1zoom=1 new crop	16.442	13.363	0.812736	22.207	embryo 3	0.601747		0.0365982
C922923S#2zoom=1 new crop	28.217	27.753	0.983556	55.164	embryo 3	0.5031		0.0178297
C922923S#3zoom=1 new crop	23.771	14.072	0.591982	66.939	embryo 3	0.210221		0.0088436
C922923S#4zoom=1 new crop	29.61	16.368	0.552786	37.891	embryo 3	0.431976		0.0145889
C922923S#5zoom=1 new crop	34.471	22.158	0.642801	73.267	embryo 3	0.302428		0.00877341
C922923S#6zoom=1 new crop	31.857	21.083	0.661801	48.372	embryo 3	0.435851		0.0136815
C922923S#7zoom=1 new crop	48.006	33.885	0.705849	68.942	embryo 3	0.4915		0.0102383
C922923S#8zoom=1 new crop	32.443	7.696	0.237216	10.847	embryo 3	0.709505		0.0218693
C922923S#9zoom=1 new crop	58.144	27.338	0.470177	56.141	embryo 3	0.486952		0.00837494
C922923S#10zoom=1 new crop	34.349	25.896	0.753908	66.646	embryo 3	0.38856		0.0113121
C922923S#1zoom=1 new crop	14.683	12.24	0.833617	21.328	embryo 6	0.573893		0.0390856
C922923S#2zoom=1 new crop	34.764	28.07	0.807444	103.805	embryo 6	0.270411		0.00777847
C922923S#3zoom=1 new crop	32.492	24.772	0.762403	64.105	embryo 6	0.386429		0.011893
C922923S#4zoom=1 new crop	33.396	26.336	0.788597	80.962	embryo 6	0.325288		0.00974034
C922923S#5zoom=1 new crop	77.102	25.652	0.332702	43.657	embryo 6	0.58758		0.00762082
C922923S#6zoom=1 new crop	58.144	33.543	0.576895	67.55	embryo 6	0.496566		0.00854027
C922923S#7zoom=1 new crop	37.207	28.999	0.779396	85.506	embryo 6	0.339146		0.00911511
C922923S#8zoom=1 new crop	51.23	19.569	0.381983	41.019	embryo 6	0.477072		0.00931235
C922923S#9zoom=1 new crop	37.501	19.984	0.532892	31.32	embryo 6	0.638059		0.0170144
C922923S#10zoom=1 new crop	98.43	52.525	0.533628	184.938	embryo 6	0.284014		0.00288544
C922923S#11zoom=1 new crop	40.774	31.808	0.780105	82.404	embryo 6	0.386001		0.00946683
C922923S#12zoom=1 new crop	37.647	30.88	0.820251	60.49	embryo 6	0.510498		0.0135601
C922923S#13zoom=1 new crop	13.51	6.865	0.508142	21.767	embryo 6	0.315386		0.0233446
C922923S#14zoom=1 new crop	56.092	40.261	0.717767	82.99	embryo 6	0.485131		0.00864884
C922923S#15zoom=1 new crop	15.269	9.797	0.641627	26.165	embryo 6	0.374431		0.0245223
C922923S#16zoom=1 new crop	23.38	17.419	0.745038	80.547	embryo 6	0.216259		0.00924974
C922923S#17zoom=1 new crop	49.862	28.706	0.575709	79.13	embryo 6	0.36277		0.00727548
C922923S#18zoom=1 new crop	40.53	11.604	0.286306	16.1	embryo 6	0.720745		0.017783
C922923S#19zoom=1 new crop	24.968	19.715	0.789611	62.639	embryo 6	0.31474		0.0126057
C922923S#20zoom=1 new crop	20.521	8.404	0.409532	15.416	embryo 6	0.545148		0.0265654
C922923S#21zoom=1 new crop	33.152	30.807	0.929265	92.909	embryo 6	0.331583		0.0100019
C922923S#22zoom=1 new crop	27.753	24.626	0.887327	76.907	embryo 6	0.320205		0.0115377
C922923S#23zoom=1 new crop	22.329	9.479	0.424515	14.292	embryo 6	0.663238		0.029703
Average			0.586389			0.433239		0.0146464
STDEV			0.23612			0.154716		0.00840349
SEM			0.0333928			0.0218804		0.00118844
AGolgi-Npn2/AGolgi					AGolgi-Npn2/ANpn2						[AGolgi-Npn2/ANpn2]/AGolgi
	WT	C878S/C885S/C887S	C922S/C923S	full CS		WT	C878S/C885S/C887S	C922S/C923S	full CS			WT	C878S/C885S/C887S	C922S/C923S	full CS
Average	0.631204	0.478505	0.586389	0.416375	Average	0.38881	0.329877	0.433239	0.267765		Average	0.0128126	0.0075883	0.0146464	0.00739561
stdev	0.232624	0.285491	0.23612	0.26069	stdev	0.114511	0.178237	0.154716	0.14853		stdev	0.00560989	0.00439748	0.00840349	0.0059683
sem	0.0387706	0.0451405	0.0333928	0.0368675	sem	0.0190852	0.0281819	0.0218804	0.0210056		sem	0.000934981	0.000695303	0.00118844	0.000844053
