# Supplementary material for: Palmitoylation regulates neuropilin-2 localization and function in cortical neurons and conveys specificity to semaphorin signaling via palmitoyl acyltransferases
Source: eLife. 2023 Apr 3;12:e83217. doi: 10.7554/eLife.83217 (PMC10069869; doi:10.7554/eLife.83217)
Supplement: Figure 3—source data 3. [file elife-83217-fig3-data3.xlsx]

## Sheet: Sumarized Data
		Npn2 wt								Npn2 TCS
Sample		#1	#2	#3	#4	#5	#6	#7		#1	#2	#3	#4	#5	#6	#7	#8
	Time in Minutes	Relative F								Relative F
Prebleach	0	1	1	1	1	1	1	1		1	1	1	1	1	1	1	1
	0.5	0.992741	0.999857	1.01272	1.00097	1.04395	0.972551	0.981825		0.970823	0.990912	1.00558	0.992731	0.998233	0.988925	1.01368	0.973208
	1	0.980369	0.995764	1.02126	0.967266	1.00968	0.948748	0.989845		0.965161	0.982309	0.999481	0.997171	0.980993	0.984008	1.00977	0.967961
	1.5	0.96615	0.968792	1.01205	1.00448	0.965574	0.954695	0.982078		0.936561	0.976858	0.988177	0.981813	0.993609	0.995064	0.992225	0.969627
	2	0.949161	0.95627	0.993823	0.984852	0.948168	0.960302	0.974587		0.918784	0.987169	0.975422	0.980629	0.979798	1.00689	1.00956	0.977863
Bleach	2.5	0.471811	0.360618	0.178794	0.257792	0.324437	0.166946	0.281171		0.412442	0.454146	0.329401	0.385583	0.262468	0.270842	0.368797	0.299605
	3	0.478643	0.382291	0.193374	0.290938	0.356215	0.201814	0.318233		0.473441	0.501236	0.369191	0.410045	0.28606	0.310332	0.430468	0.322674
	3.5	0.468302	0.392165	0.197211	0.348465	0.405804	0.209842	0.347717		0.508492	0.52987	0.378819	0.429622	0.340822	0.355275	0.517958	0.379055
	4	0.476243	0.425517	0.199705	0.38115	0.424933	0.24143	0.367538		0.530068	0.559555	0.384647	0.44968	0.3666	0.369438	0.568128	0.412202
	4.5	0.479012	0.440327	0.210352	0.379948	0.453604	0.264386	0.370028		0.54426	0.582476	0.389849	0.466741	0.381458	0.392545	0.577794	0.41342
	5	0.483629	0.440207	0.211982	0.391225	0.439033	0.266925	0.382702		0.567413	0.598895	0.387298	0.476141	0.380883	0.399871	0.604253	0.437694
	5.5	0.453344	0.451405	0.217738	0.409168	0.436771	0.279141	0.387247		0.569061	0.62024	0.399803	0.478398	0.399811	0.424646	0.620579	0.441687
	6	0.460546	0.451044	0.213037	0.433696	0.442149	0.264543	0.400637		0.58268	0.637644	0.387473	0.486429	0.403834	0.417221	0.634582	0.465308
	6.5	0.45279	0.47368	0.22004	0.457418	0.454321	0.281257	0.415247		0.595869	0.647364	0.385897	0.492942	0.407991	0.438811	0.64958	0.479002
	7	0.466271	0.489935	0.217642	0.4541	0.428564	0.287611	0.420373		0.591139	0.654785	0.38032	0.498308	0.418173	0.439272	0.657878	0.477549
	7.5	0.457407	0.477774	0.220519	0.471048	0.412426	0.310759	0.42598		0.590852	0.659251	0.397027	0.504081	0.416868	0.446844	0.675775	0.494853
	8	0.475504	0.480062	0.221862	0.469984	0.394677	0.311493	0.428845		0.615294	0.67232	0.414308	0.512149	0.421291	0.457015	0.700348	0.510496
	8.5	0.472549	0.499567	0.219752	0.510072	0.405359	0.288308	0.439331		0.622247	0.683551	0.407455	0.52092	0.427647	0.471473	0.703743	0.502474
	9	0.470703	0.503421	0.215531	0.494925	0.386675	0.30721	0.436803		0.611639	0.683551	0.412632	0.525435	0.427723	0.461825	0.715648	0.518354
	9.5	0.488061	0.505467	0.217929	0.493292	0.378306	0.310836	0.439126		0.643679	0.698985	0.411657	0.527322	0.436367	0.466103	0.713521	0.514107
	10	0.473473	0.497521	0.210831	0.503733	0.3903	0.308664	0.441613		0.637945	0.707982	0.417309	0.536093	0.442198	0.471937	0.712992	0.524263
	10.5	0.471811	0.4974	0.216683	0.532665	0.37224	0.31052	0.445211		0.652783	0.704501	0.393875	0.542939	0.440859	0.487409	0.721369	0.531543
	11	0.480674	0.510163	0.213613	0.494115	0.363239	0.31472	0.446505		0.675003	0.701349	0.393925	0.541755	0.451388	0.495345	0.730519	0.549497
	11.5	0.461285	0.489212	0.217738	0.548256	0.350307	0.310789	0.450766		0.689124	0.719278	0.381045	0.540793	0.446722	0.490987	0.72469	0.530591
	12	0.469779	0.513896	0.219368	0.550048	0.339186	0.334282	0.455324		0.680092	0.722562	0.372542	0.544161	0.456837	0.502861	0.734046	0.546874
	12.5	0.465901	0.530632	0.217162	0.356866	0.31913	0.348382	0.451133		0.695575	0.723416	0.374468	0.546122	0.451725	0.511078	0.739539	0.535813
	13	0.457961	0.525575	0.219176	0.361065	0.314977	0.32961	0.454354		0.687906	0.737602	0.348958	0.540053	0.457527	0.50995	0.752537	0.548124
	13.5	0.459069	0.513294	0.22263	0.342993	0.314668	0.343523	0.456856		0.673928	0.739835	0.32665	0.540423	0.461944	0.505276	0.763366	0.541486
	14	0.445958	0.531957	0.225123	0.330244	0.323127	0.366011	0.455776		0.69278	0.736814	0.342306	0.547602	0.460292	0.511884	0.75535	0.552079
	14.5	0.45039	0.533643	0.22263	0.320752	0.297586	0.331283	0.459428		0.69579	0.743578	0.346107	0.542939	0.457175	0.501997	0.76362	0.539451
	15	0.445404	0.534365	0.222917	0.295553	0.290422	0.32932	0.454295		0.702886	0.753364	0.342056	0.549897	0.473792	0.517225	0.770241	0.539559
	15.5	0.437094	0.508237	0.228001	0.258629	0.271879	0.31958	0.459728		0.710126	0.758158	0.312694	0.556558	0.455717	0.51214	0.772175	0.533204
	16	0.444665	0.5033	0.230399	0.26574	0.286331	0.329506	0.458102		0.690558	0.766368	0.299239	0.560629	0.463667	0.50624	0.75284	0.545369
	16.5	0.429523	0.515582	0.225123	0.236305	0.267726	0.321029	0.466156		0.681024	0.759078	0.313069	0.562665	0.478609	0.508789	0.763842	0.531631
	17	0.446327	0.517629	0.238264	0.24202	0.288633	0.317749	0.471381		0.687762	0.755925	0.328125	0.571842	0.466987	0.526279	0.760156	0.561736
	17.5	0.447435	0.530392	0.222534	0.241901	0.267681	0.333578	0.46762		0.686974	0.75448	0.336053	0.570288	0.498686	0.511519	0.762062	0.549165

## Sheet: wt -11-14
phNpn2wt_Neuron2_FRAP	Time	Section	Area	Mean	Min	Max		Background	Area	Mean	Min	Max		Adjusted F	%		Control	Area	Mean	Min	Max		Adjusted F	%	change	ave change		corrected F	corrected%
	0	1	85.78	10.364	0	229		1	85.78	0.149	0	5		10.215	1		1	85.78	9.55	0	137		9.401	1	0.970535	0.995691		1	1
	0.5	2	85.78	10.218	0	255		2	85.78	0.197	0	10		10.021	0.981008		2	85.78	9.321	0	151		9.124	0.970535	0.994849			0.985253	0.985253
	1	3	85.78	10.257	0	241		3	85.78	0.166	0	4		10.091	0.987861		3	85.78	9.243	0	148		9.077	0.965536	0.983695			0.992136	0.992136
	1.5	4	85.78	10.271	0	217		4	85.78	0.162	0	5		10.109	0.989623		4	85.78	9.091	0	148		8.929	0.949793	0.979057			0.993905	0.993905
	2	5	85.78	9.95	0	255		5	85.78	0.172	0	6		9.778	0.95722		5	85.78	8.914	0	130		8.742	0.929901	1.03672			0.961362	0.961362
	0	6	85.78	3.463	0	50		6	85.78	0.156	0	3		3.307	0.32374		6	85.78	9.219	0	138		9.063	0.964046	0.972305			0.32514	0.32514
	0.5	7	85.78	3.806	0	80		7	85.78	0.162	0	4		3.644	0.35673		7	85.78	8.974	0	156		8.812	0.937347	0.998525			0.358274	0.358274
	1	8	85.78	3.892	0	86		8	85.78	0.163	0	5		3.729	0.365051		8	85.78	8.962	0	145		8.799	0.935964	0.991022			0.366631	0.366631
	1.5	9	85.78	3.978	0	50		9	85.78	0.157	0	5		3.821	0.374058		9	85.78	8.877	0	138		8.72	0.927561	0.978555			0.375676	0.375676
	2	10	85.78	4.068	0	53		10	85.78	0.171	0	7		3.897	0.381498		10	85.78	8.704	0	166		8.533	0.907669	0.990625			0.383149	0.383149
	2.5	11	85.78	4.063	0	45		11	85.78	0.149	0	4		3.914	0.383162		11	85.78	8.602	0	146		8.453	0.89916	0.988406			0.38482	0.38482
	3	12	85.78	4.008	0	51		12	85.78	0.173	0	5		3.835	0.375428		12	85.78	8.528	0	138		8.355	0.888735	0.986236			0.377053	0.377053
	3.5	13	85.78	4.102	0	57		13	85.78	0.166	0	15		3.936	0.385316		13	85.78	8.406	0	127		8.24	0.876502	1.01396			0.386983	0.386983
	4	14	85.78	4.191	0	56		14	85.78	0.167	0	4		4.024	0.39393		14	85.78	8.522	0	138		8.355	0.888735	0.997606			0.395635	0.395635
	4.5	15	85.78	4.259	0	56		15	85.78	0.16	0	3		4.099	0.401273		15	85.78	8.495	0	135		8.335	0.886608	0.989442			0.403009	0.403009
	5	16	85.78	4.255	0	53		16	85.78	0.154	0	3		4.101	0.401468		16	85.78	8.401	0	139		8.247	0.877247	1.00691			0.403206	0.403206
	5.5	17	85.78	4.294	0	45		17	85.78	0.166	0	6		4.128	0.404112		17	85.78	8.47	0	127		8.304	0.88331	0.993377			0.40586	0.40586
	6	18	85.78	4.221	0	46		18	85.78	0.168	0	4		4.053	0.396769		18	85.78	8.417	0	123		8.249	0.87746	1.01794			0.398486	0.398486
	6.5	19	85.78	4.322	0	49		19	85.78	0.179	0	3		4.143	0.40558		19	85.78	8.576	0	141		8.397	0.893203	1.0137			0.407335	0.407335
	7	20	85.78	4.383	0	50		20	85.78	0.166	0	5		4.217	0.412824		20	85.78	8.678	0	170		8.512	0.905436	0.998825			0.414611	0.414611
	7.5	21	85.78	4.366	0	60		21	85.78	0.165	0	7		4.201	0.411258		21	85.78	8.667	0	150		8.502	0.904372	0.979534			0.413038	0.413038
	8	22	85.78	4.509	0	54		22	85.78	0.181	0	6		4.328	0.423691		22	85.78	8.509	0	163		8.328	0.885863	0.995917			0.425524	0.425524
	8.5	23	85.78	4.489	0	47		23	85.78	0.182	0	4		4.307	0.421635		23	85.78	8.476	0	158		8.294	0.882247	1.01374			0.423459	0.423459
	9	24	85.78	4.511	0	54		24	85.78	0.166	0	4		4.345	0.425355		24	85.78	8.574	0	137		8.408	0.894373	1.00511			0.427195	0.427195
	9.5	25	85.78	4.444	0	44		25	85.78	0.201	0	5		4.243	0.41537		25	85.78	8.652	0	138		8.451	0.898947	0			0.417167	0.417167
phNpn2wt_Neuron3_FRAP		Section	Area	Mean	Min	Max		Background	Area	Mean	Min	Max		Adjusted F	%		Control	Area	Mean	Min	Max		Adjusted F	%	change	ave change		corrected F	corrected%
	0	1	88.249	5.768	0	201		1	88.249	0.33	0	10		5.438	1		1	88.249	10.907	0	255		10.577	1	0.984495	0.995827		1	1
	0.5	2	88.249	5.68	0	203		2	88.249	0.304	0	11		5.376	0.988599		2	88.249	10.717	0	255		10.413	0.984495	1.0024			0.992741	0.992741
	1	3	88.249	5.618	0	244		3	88.249	0.309	0	8		5.309	0.976278		3	88.249	10.747	0	255		10.438	0.986858	0.995497			0.980369	0.980369
	1.5	4	88.249	5.556	0	230		4	88.249	0.324	0	8		5.232	0.962118		4	88.249	10.715	0	255		10.391	0.982415	0.983543			0.96615	0.96615
	2	5	88.249	5.481	0	196		5	88.249	0.341	0	8		5.14	0.9452		5	88.249	10.561	0	255		10.22	0.966248	1.00411			0.949161	0.949161
	2.5	6	88.249	2.851	0	112		6	88.249	0.296	0	9		2.555	0.469842		6	88.249	10.558	0	255		10.262	0.970218	0.999903			0.471811	0.471811
	3	7	88.249	2.871	0	114		7	88.249	0.279	0	9		2.592	0.476646		7	88.249	10.54	0	255		10.261	0.970124	0.988013			0.478643	0.478643
	3.5	8	88.249	2.861	0	96		8	88.249	0.325	0	14		2.536	0.466348		8	88.249	10.463	0	255		10.138	0.958495	0.988657			0.468302	0.468302
	4	9	88.249	2.912	0	101		9	88.249	0.333	0	11		2.579	0.474255		9	88.249	10.356	0	255		10.023	0.947622	1.00738			0.476242	0.476242
	4.5	10	88.249	2.918	0	102		10	88.249	0.324	0	8		2.594	0.477014		10	88.249	10.421	0	255		10.097	0.954619	1.00545			0.479012	0.479012
	5	11	88.249	2.905	0	97		11	88.249	0.286	0	8		2.619	0.481611		11	88.249	10.438	0	255		10.152	0.959818	1.00394			0.483629	0.483629
	5.5	12	88.249	2.774	0	90		12	88.249	0.319	0	7		2.455	0.451453		12	88.249	10.511	0	255		10.192	0.9636	1.00196			0.453344	0.453344
	6	13	88.249	2.814	0	108		13	88.249	0.32	0	10		2.494	0.458624		13	88.249	10.532	0	255		10.212	0.965491	0.973365			0.460546	0.460546
	6.5	14	88.249	2.768	0	93		14	88.249	0.316	0	10		2.452	0.450901		14	88.249	10.256	0	255		9.94	0.939775	1.01992			0.45279	0.45279
	7	15	88.249	2.82	0	99		15	88.249	0.295	0	8		2.525	0.464325		15	88.249	10.433	0	255		10.138	0.958495	0.97031			0.466271	0.466271
	7.5	16	88.249	2.828	0	107		16	88.249	0.351	0	10		2.477	0.455498		16	88.249	10.188	0	255		9.837	0.930037	1.02257			0.457407	0.457407
	8	17	88.249	2.879	0	111		17	88.249	0.304	0	11		2.575	0.47352		17	88.249	10.363	0	255		10.059	0.951026	0.980913			0.475504	0.475504
	8.5	18	88.249	2.911	0	87		18	88.249	0.352	0	10		2.559	0.470577		18	88.249	10.219	0	255		9.867	0.932873	0.998176			0.472549	0.472549
	9	19	88.249	2.914	0	85		19	88.249	0.365	0	9		2.549	0.468739		19	88.249	10.214	0	255		9.849	0.931171	1.01239			0.470703	0.470703
	9.5	20	88.249	2.938	0	96		20	88.249	0.295	0	9		2.643	0.486024		20	88.249	10.266	0	255		9.971	0.942706	0.978939			0.488061	0.488061
	10	21	88.249	2.883	0	92		21	88.249	0.319	0	12		2.564	0.471497		21	88.249	10.08	0	255		9.761	0.922851	0.987809			0.473473	0.473473
	10.5	22	88.249	2.919	0	86		22	88.249	0.364	0	7		2.555	0.469842		22	88.249	10.006	0	255		9.642	0.911601	1.02313			0.471811	0.471811
	11	23	88.249	2.908	0	88		23	88.249	0.305	0	8		2.603	0.478669		23	88.249	10.17	0	255		9.865	0.932684	0.98591			0.480674	0.480674
	11.5	24	88.249	2.795	0	90		24	88.249	0.297	0	12		2.498	0.45936		24	88.249	10.023	0	255		9.726	0.919542	0.992803			0.461285	0.461285
	12	25	88.249	2.86	0	96		25	88.249	0.316	0	13		2.544	0.467819		25	88.249	9.972	0	255		9.656	0.912924	0.998343			0.469779	0.469779
	12.5	26	88.249	2.845	0	93		26	88.249	0.322	0	9		2.523	0.463957		26	88.249	9.962	0	255		9.64	0.911412	1.01421			0.465901	0.465901
	13	27	88.249	2.786	0	76		27	88.249	0.306	0	8		2.48	0.45605		27	88.249	10.083	0	255		9.777	0.924364	0.979237			0.457961	0.457961
	13.5	28	88.249	2.821	0	82		28	88.249	0.335	0	9		2.486	0.457153		28	88.249	9.909	0	255		9.574	0.905172	1.00251			0.459069	0.459069
	14	29	88.249	2.738	0	71		29	88.249	0.323	0	8		2.415	0.444097		29	88.249	9.921	0	255		9.598	0.907441	0.989581			0.445958	0.445958
	14.5	30	88.249	2.768	0	84		30	88.249	0.329	0	10		2.439	0.44851		30	88.249	9.827	0	255		9.498	0.897986	0.983891			0.45039	0.45039
	15	31	88.249	2.748	0	74		31	88.249	0.336	0	8		2.412	0.443545		31	88.249	9.681	0	255		9.345	0.883521	1.00246			0.445404	0.445404
	15.5	32	88.249	2.667	0	74		32	88.249	0.3	0	8		2.367	0.43527		32	88.249	9.668	0	255		9.368	0.885695	1.00278			0.437094	0.437094
	16	33	88.249	2.725	0	77		33	88.249	0.317	0	8		2.408	0.44281		33	88.249	9.711	0	255		9.394	0.888154	0.993932			0.444665	0.444665
	16.5	34	88.249	2.65	0	75		34	88.249	0.324	0	10		2.326	0.427731		34	88.249	9.661	0	255		9.337	0.882764	0.993574			0.429523	0.429523
	17	35	88.249	2.722	0	76		35	88.249	0.305	0	10		2.417	0.444465		35	88.249	9.582	0	255		9.277	0.877092	0.995149			0.446327	0.446327
	17.5	36	88.249	2.733	0	80		36	88.249	0.31	0	11		2.423	0.445568		36	88.249	9.542	0	255		9.232	0.872837	0.995451			0.447435	0.447435
		37	88.249	2.766	0	86		37	88.249	0.366	0	10		2.4	0.441339		37	88.249	9.556	0	255		9.19	0.868866	0.997388			0.443188	0.443188
		38	88.249	2.749	0	79		38	88.249	0.324	0	10		2.425	0.445936		38	88.249	9.49	0	250		9.166	0.866597	0.995636			0.447805	0.447805
		39	88.249	2.759	0	81		39	88.249	0.303	0	7		2.456	0.451637		39	88.249	9.429	0	255		9.126	0.862816	0.984878			0.453529	0.453529
		40	88.249	2.706	0	77		40	88.249	0.3	0	11		2.406	0.442442		40	88.249	9.288	0	255		8.988	0.849768	0.995216			0.444296	0.444296
		41	88.249	2.689	0	67		41	88.249	0.294	0	12		2.395	0.440419		41	88.249	9.239	0	255		8.945	0.845703	1.00123			0.442265	0.442265
		42	88.249	2.739	0	69		42	88.249	0.33	0	10		2.409	0.442994		42	88.249	9.286	0	244		8.956	0.846743	1.00625			0.44485	0.44485
		43	88.249	2.627	0	75		43	88.249	0.295	0	10		2.332	0.428834		43	88.249	9.307	0	255		9.012	0.852037	0.967044			0.430631	0.430631
		44	88.249	2.621	0	70		44	88.249	0.308	0	10		2.313	0.42534		44	88.249	9.023	0	244		8.715	0.823958	0.998394			0.427122	0.427122
		45	88.249	2.587	0	65		45	88.249	0.314	0	9		2.273	0.417985		45	88.249	9.015	0	236		8.701	0.822634	1.01517			0.419736	0.419736
		46	88.249	2.678	0	69		46	88.249	0.313	0	12		2.365	0.434903		46	88.249	9.146	0	255		8.833	0.835114	0.998981			0.436725	0.436725
		47	88.249	2.654	0	79		47	88.249	0.312	0	12		2.342	0.430673		47	88.249	9.136	0	255		8.824	0.834263	0.994334			0.432478	0.432478
		48	88.249	2.623	0	68		48	88.249	0.305	0	12		2.318	0.42626		48	88.249	9.079	0	241		8.774	0.829536	0.987007			0.428046	0.428046
		49	88.249	2.644	0	72		49	88.249	0.327	0	14		2.317	0.426076		49	88.249	8.987	0	239		8.66	0.818758	0.985681			0.427861	0.427861
		50	88.249	2.574	0	63		50	88.249	0.332	0	10		2.242	0.412284		50	88.249	8.868	0	244		8.536	0.807034	1.01347			0.414011	0.414011
		51	88.249	2.492	0	68		51	88.249	0.315	0	10		2.177	0.400331		51	88.249	8.966	0	247		8.651	0.817907	0.975957			0.402008	0.402008
		52	88.249	2.63	0	61		52	88.249	0.296	0	13		2.334	0.429202		52	88.249	8.739	0	231		8.443	0.798241	0.988156			0.431	0.431
		53	88.249	2.536	0	65		53	88.249	0.301	0	8		2.235	0.410997		53	88.249	8.644	0	225		8.343	0.788787	1.00611			0.412719	0.412719
		54	88.249	2.514	0	72		54	88.249	0.278	0	10		2.236	0.411181		54	88.249	8.672	0	234		8.394	0.793609	1.00226			0.412904	0.412904
		55	88.249	2.502	0	60		55	88.249	0.281	0	11		2.221	0.408422		55	88.249	8.694	0	222		8.413	0.795405	0.989421			0.410134	0.410134
		56	88.249	2.541	0	69		56	88.249	0.302	0	10		2.239	0.411732		56	88.249	8.626	0	221		8.324	0.786991	1.00156			0.413458	0.413458
		57	88.249	2.543	0	69		57	88.249	0.298	0	10		2.245	0.412836		57	88.249	8.635	0	240		8.337	0.78822	0.996881			0.414565	0.414565
		58	88.249	2.572	0	75		58	88.249	0.301	0	7		2.271	0.417617		58	88.249	8.612	0	237		8.311	0.785762	0.991457			0.419367	0.419367
		59	88.249	2.581	0	69		59	88.249	0.263	0	8		2.318	0.42626		59	88.249	8.503	0	219		8.24	0.779049	0.998301			0.428046	0.428046
		60	88.249	2.637	0	64		60	88.249	0.317	0	18		2.32	0.426627		60	88.249	8.543	0	226		8.226	0.777725	1.00924			0.428415	0.428415
		61	88.249	2.669	0	80		61	88.249	0.329	0	9		2.34	0.430305		61	88.249	8.631	0	229		8.302	0.784911	0.98675			0.432108	0.432108
		62	88.249	2.576	0	70		62	88.249	0.298	0	8		2.278	0.418904		62	88.249	8.49	0	238		8.192	0.774511	0.987915			0.420659	0.420659
		63	88.249	2.623	0	70		63	88.249	0.283	0	8		2.34	0.430305		63	88.249	8.376	0	224		8.093	0.765151	0.99481			0.432108	0.432108
		64	88.249	2.599	0	77		64	88.249	0.286	0	9		2.313	0.42534		64	88.249	8.337	0	223		8.051	0.76118	1.00075			0.427122	0.427122
		65	88.249	2.712	0	77		65	88.249	0.28	0	7		2.432	0.447223		65	88.249	8.337	0	240		8.057	0.761747	0			0.449097	0.449097
phNpn2wt_Neuron4_FRAP		Section	Area	Mean	Min	Max		Background	Area	Mean	Min	Max		Adjusted F	%		Control	Area	Mean	Min	Max		Adjusted F	%	change	ave change		corrected F	corrected%
	0	1	109.256	8.671	0	255		1	109.256	0.358	0	13		8.313	1		1	109.256	4.28	0	71		3.922	1	1.00459	0.99906		1	1
	0.5	2	109.256	8.678	0	255		2	109.256	0.374	0	11		8.304	0.998917		2	109.256	4.314	0	68		3.94	1.00459	0.979188			0.999857	0.999857
	1	3	109.256	8.652	0	255		3	109.256	0.382	0	10		8.27	0.994827		3	109.256	4.24	0	63		3.858	0.983682	0.989632			0.995764	0.995764
	1.5	4	109.256	8.438	0	255		4	109.256	0.392	0	12		8.046	0.967882		4	109.256	4.21	0	69		3.818	0.973483	0.996333			0.968793	0.968793
	2	5	109.256	8.314	0	255		5	109.256	0.372	0	11		7.942	0.955371		5	109.256	4.176	0	87		3.804	0.969913	1.0255			0.95627	0.95627
	2.5	6	109.256	3.363	0	95		6	109.256	0.368	0	12		2.995	0.360279		6	109.256	4.269	0	74		3.901	0.994646	0.99436			0.360618	0.360618
	3	7	109.256	3.528	0	77		7	109.256	0.353	0	10		3.175	0.381932		7	109.256	4.232	0	62		3.879	0.989036	0.996649			0.382291	0.382291
	3.5	8	109.256	3.638	0	76		8	109.256	0.381	0	13		3.257	0.391796		8	109.256	4.247	0	71		3.866	0.985722	1.01138			0.392165	0.392165
	4	9	109.256	3.923	0	93		9	109.256	0.389	0	13		3.534	0.425117		9	109.256	4.299	0	71		3.91	0.99694	1.02123			0.425517	0.425517
	4.5	10	109.256	4.017	0	77		10	109.256	0.36	0	10		3.657	0.439913		10	109.256	4.353	0	69		3.993	1.0181	0.989732			0.440327	0.440327
	5	11	109.256	4.021	0	84		11	109.256	0.365	0	11		3.656	0.439793		11	109.256	4.317	0	73		3.952	1.00765	0.985071			0.440207	0.440207
	5.5	12	109.256	4.106	0	96		12	109.256	0.357	0	10		3.749	0.45098		12	109.256	4.25	0	77		3.893	0.992606	1.00437			0.451405	0.451405
	6	13	109.256	4.137	0	101		13	109.256	0.391	0	12		3.746	0.45062		13	109.256	4.301	0	80		3.91	0.99694	0.97954			0.451044	0.451044
	6.5	14	109.256	4.295	0	94		14	109.256	0.361	0	19		3.934	0.473235		14	109.256	4.191	0	70		3.83	0.976543	1.01932			0.47368	0.47368
	7	15	109.256	4.453	0	110		15	109.256	0.384	0	11		4.069	0.489474		15	109.256	4.288	0	69		3.904	0.995411	1.00973			0.489935	0.489935
	7.5	16	109.256	4.352	0	92		16	109.256	0.384	0	12		3.968	0.477325		16	109.256	4.326	0	73		3.942	1.0051	0.986301			0.477774	0.477774
	8	17	109.256	4.364	0	98		17	109.256	0.377	0	13		3.987	0.47961		17	109.256	4.265	0	76		3.888	0.991331	0.991512			0.480062	0.480062
	8.5	18	109.256	4.487	0	105		18	109.256	0.338	0	11		4.149	0.499098		18	109.256	4.193	0	61		3.855	0.982917	0.97821			0.499568	0.499568
	9	19	109.256	4.539	0	103		19	109.256	0.358	0	13		4.181	0.502947		19	109.256	4.129	0	59		3.771	0.961499	0.997083			0.503421	0.503421
	9.5	20	109.256	4.542	0	94		20	109.256	0.344	0	11		4.198	0.504992		20	109.256	4.104	0	68		3.76	0.958695	0.976064			0.505467	0.505467
	10	21	109.256	4.482	0	121		21	109.256	0.35	0	8		4.132	0.497053		21	109.256	4.02	0	54		3.67	0.935747	1.03406			0.497521	0.497521
	10.5	22	109.256	4.49	0	86		22	109.256	0.359	0	10		4.131	0.496933		22	109.256	4.154	0	52		3.795	0.967619	1.00316			0.4974	0.4974
	11	23	109.256	4.602	0	94		23	109.256	0.365	0	10		4.237	0.509684		23	109.256	4.172	0	58		3.807	0.970678	0.991594			0.510163	0.510163
	11.5	24	109.256	4.435	0	90		24	109.256	0.372	0	11		4.063	0.488753		24	109.256	4.147	0	50		3.775	0.962519	0.998411			0.489213	0.489213
	12	25	109.256	4.618	0	95		25	109.256	0.35	0	13		4.268	0.513413		25	109.256	4.119	0	56		3.769	0.960989	0.98355			0.513896	0.513896
	12.5	26	109.256	4.782	0	179		26	109.256	0.375	0	11		4.407	0.530134		26	109.256	4.082	0	56		3.707	0.945181	1.01538			0.530632	0.530632
	13	27	109.256	4.699	0	85		27	109.256	0.334	0	12		4.365	0.525081		27	109.256	4.098	0	58		3.764	0.959714	1.01674			0.525575	0.525575
	13.5	28	109.256	4.603	0	82		28	109.256	0.34	0	8		4.263	0.512811		28	109.256	4.167	0	46		3.827	0.975778	0.99608			0.513294	0.513294
	14	29	109.256	4.755	0	90		29	109.256	0.337	0	8		4.418	0.531457		29	109.256	4.149	0	56		3.812	0.971953	0.992392			0.531957	0.531957
	14.5	30	109.256	4.798	0	86		30	109.256	0.366	0	10		4.432	0.533141		30	109.256	4.149	0	73		3.783	0.964559	1.0037			0.533643	0.533643
	15	31	109.256	4.819	0	85		31	109.256	0.381	0	14		4.438	0.533863		31	109.256	4.178	0	67		3.797	0.968129	1.0108			0.534365	0.534365
	15.5	32	109.256	4.564	0	90		32	109.256	0.343	0	11		4.221	0.507759		32	109.256	4.181	0	65		3.838	0.978582	0.995831			0.508237	0.508237
	16	33	109.256	4.537	0	95		33	109.256	0.357	0	9		4.18	0.502827		33	109.256	4.179	0	60		3.822	0.974503	0.960754			0.5033	0.5033
	16.5	34	109.256	4.634	0	83		34	109.256	0.352	0	9		4.282	0.515097		34	109.256	4.024	0	56		3.672	0.936257	1.00681			0.515582	0.515582
	17	35	109.256	4.65	0	89		35	109.256	0.351	0	14		4.299	0.517142		35	109.256	4.048	0	58		3.697	0.942631	0.984853			0.517629	0.517629
	17.5	36	109.256	4.766	0	86		36	109.256	0.361	0	12		4.405	0.529893		36	109.256	4.002	0	56		3.641	0.928353	1.01318			0.530392	0.530392
		37	109.256	4.759	0	98		37	109.256	0.376	0	14		4.383	0.527246		37	109.256	4.065	0	54		3.689	0.940592	0.995121			0.527743	0.527743
		38	109.256	4.747	0	83		38	109.256	0.346	0	14		4.401	0.529412		38	109.256	4.017	0	63		3.671	0.936002	0.993735			0.52991	0.52991
		39	109.256	4.823	0	97		39	109.256	0.358	0	11		4.465	0.537111		39	109.256	4.006	0	67		3.648	0.930138	1.01316			0.537616	0.537616
		40	109.256	4.805	0	95		40	109.256	0.345	0	12		4.46	0.536509		40	109.256	4.041	0	57		3.696	0.942376	1.00298			0.537014	0.537014
		41	109.256	4.662	0	86		41	109.256	0.358	0	9		4.304	0.517743		41	109.256	4.065	0	51		3.707	0.945181	1.00135			0.518231	0.518231
		42	109.256	4.603	0	78		42	109.256	0.33	0	7		4.273	0.514014		42	109.256	4.042	0	48		3.712	0.946456	1.00781			0.514498	0.514498
		43	109.256	4.644	0	86		43	109.256	0.328	0	7		4.316	0.519187		43	109.256	4.069	0	54		3.741	0.95385	1.02245			0.519675	0.519675
		44	109.256	4.563	0	91		44	109.256	0.349	0	11		4.214	0.506917		44	109.256	4.174	0	57		3.825	0.975268	1.02092			0.507394	0.507394
		45	109.256	4.637	0	88		45	109.256	0.34	0	11		4.297	0.516901		45	109.256	4.245	0	51		3.905	0.995665	0.963892			0.517388	0.517388
		46	109.256	4.632	0	85		46	109.256	0.346	0	9		4.286	0.515578		46	109.256	4.11	0	54		3.764	0.959714	1.0186			0.516063	0.516063
		47	109.256	4.563	0	83		47	109.256	0.354	0	9		4.209	0.506315		47	109.256	4.188	0	63		3.834	0.977562	0.96505			0.506792	0.506792
		48	109.256	4.614	0	86		48	109.256	0.368	0	11		4.246	0.510766		48	109.256	4.068	0	54		3.7	0.943396	1.01676			0.511247	0.511247
		49	109.256	4.582	0	94		49	109.256	0.351	0	9		4.231	0.508962		49	109.256	4.113	0	68		3.762	0.959204	0.987507			0.509441	0.509441
		50	109.256	4.49	0	89		50	109.256	0.356	0	9		4.134	0.497293		50	109.256	4.071	0	49		3.715	0.947221	1.04065			0.497761	0.497761
		51	109.256	4.679	0	85		51	109.256	0.34	0	15		4.339	0.521954		51	109.256	4.206	0	64		3.866	0.985722	0.975944			0.522445	0.522445
		52	109.256	4.625	0	86		52	109.256	0.328	0	11		4.297	0.516901		52	109.256	4.101	0	44		3.773	0.962009	0.992844			0.517388	0.517388
		53	109.256	4.412	0	84		53	109.256	0.362	0	11		4.05	0.487189		53	109.256	4.108	0	48		3.746	0.955125	1.0024			0.487647	0.487647
		54	109.256	4.531	0	101		54	109.256	0.327	0	10		4.204	0.505714		54	109.256	4.082	0	61		3.755	0.95742	0.976298			0.50619	0.50619
		55	109.256	4.447	0	88		55	109.256	0.371	0	13		4.076	0.490316		55	109.256	4.037	0	49		3.666	0.934727	1.00109			0.490778	0.490778
		56	109.256	4.523	0	89		56	109.256	0.361	0	14		4.162	0.500662		56	109.256	4.031	0	59		3.67	0.935747	1.02698			0.501133	0.501133
		57	109.256	4.523	0	93		57	109.256	0.354	0	13		4.169	0.501504		57	109.256	4.123	0	52		3.769	0.960989	0.976121			0.501976	0.501976
		58	109.256	4.517	0	87		58	109.256	0.377	0	10		4.14	0.498015		58	109.256	4.056	0	54		3.679	0.938042	1.02473			0.498484	0.498484
		59	109.256	4.554	0	82		59	109.256	0.389	0	9		4.165	0.501022		59	109.256	4.159	0	61		3.77	0.961244	0.986207			0.501494	0.501494
		60	109.256	4.494	0	99		60	109.256	0.357	0	9		4.137	0.497654		60	109.256	4.075	0	51		3.718	0.947986	1.00027			0.498123	0.498123
		61	109.256	4.491	0	89		61	109.256	0.385	0	8		4.106	0.493925		61	109.256	4.104	0	50		3.719	0.948241	0.966389			0.49439	0.49439
		62	109.256	4.475	0	79		62	109.256	0.389	0	10		4.086	0.491519		62	109.256	3.983	0	50		3.594	0.916369	1.01781			0.491982	0.491982
		63	109.256	4.582	0	89		63	109.256	0.359	0	10		4.223	0.508		63	109.256	4.017	0	52		3.658	0.932687	1.02925			0.508478	0.508478
		64	109.256	4.726	0	92		64	109.256	0.366	0	10		4.36	0.52448		64	109.256	4.131	0	45		3.765	0.959969	0.946879			0.524973	0.524973
		65	109.256	4.579	0	102		65	109.256	0.37	0	14		4.209	0.506315		65	109.256	3.935	0	45		3.565	0.908975	1.01515			0.506792	0.506792
		66	109.256	4.519	0	83		66	109.256	0.356	0	10		4.163	0.500782		66	109.256	3.975	0	51		3.619	0.922743	1.01686			0.501253	0.501253
		67	109.256	4.71	0	88		67	109.256	0.35	0	11		4.36	0.52448		67	109.256	4.03	0	47		3.68	0.938297	0.999457			0.524973	0.524973
		68	109.256	4.64	0	79		68	109.256	0.357	0	12		4.283	0.515217		68	109.256	4.035	0	48		3.678	0.937787	1.01441			0.515702	0.515702
		69	109.256	4.631	0	83		69	109.256	0.344	0	11		4.287	0.515698		69	109.256	4.075	0	59		3.731	0.9513	1.0059			0.516184	0.516184
		70	109.256	4.612	0	87		70	109.256	0.331	0	10		4.281	0.514977		70	109.256	4.084	0	48		3.753	0.95691	1.00187			0.515461	0.515461
		71	109.256	4.684	0	93		71	109.256	0.372	0	13		4.312	0.518706		71	109.256	4.132	0	54		3.76	0.958695	1.03032			0.519194	0.519194
		72	109.256	4.659	0	96		72	109.256	0.327	0	12		4.332	0.521112		72	109.256	4.201	0	49		3.874	0.987761	0.960506			0.521602	0.521602
		73	109.256	4.68	0	86		73	109.256	0.336	0	10		4.344	0.522555		73	109.256	4.057	0	52		3.721	0.948751	1			0.523047	0.523047
		74	109.256	4.825	0	85		74	109.256	0.368	0	11		4.457	0.536148		74	109.256	4.089	0	49		3.721	0.948751	1.03628			0.536653	0.536653
		75	109.256	4.597	0	89		75	109.256	0.345	0	11		4.252	0.511488		75	109.256	4.201	0	57		3.856	0.983172	0.977697			0.511969	0.511969
		76	109.256	4.638	0	78		76	109.256	0.349	0	9		4.289	0.515939		76	109.256	4.119	0	51		3.77	0.961244	0.990186			0.516424	0.516424
		77	109.256	4.593	0	85		77	109.256	0.33	0	10		4.263	0.512811		77	109.256	4.063	0	53		3.733	0.95181	0.969194			0.513294	0.513294
		78	109.256	4.483	0	94		78	109.256	0.387	0	14		4.096	0.492722		78	109.256	4.005	0	47		3.618	0.922489	1.03068			0.493186	0.493186
		79	109.256	4.445	0	91		79	109.256	0.379	0	12		4.066	0.489113		79	109.256	4.108	0	49		3.729	0.95079	0.965674			0.489574	0.489574
		80	109.256	4.417	0	94		80	109.256	0.344	0	10		4.073	0.489955		80	109.256	3.945	0	43		3.601	0.918154	0.982227			0.490417	0.490417
		81	109.256	4.399	0	78		81	109.256	0.346	0	8		4.053	0.48755		81	109.256	3.883	0	47		3.537	0.901836	1.00848			0.488008	0.488008
		82	109.256	4.485	0	87		82	109.256	0.338	0	11		4.147	0.498857		82	109.256	3.905	0	45		3.567	0.909485	1.01458			0.499327	0.499327
		83	109.256	4.525	0	81		83	109.256	0.353	0	9		4.172	0.501865		83	109.256	3.972	0	47		3.619	0.922743	0.997237			0.502337	0.502337
		84	109.256	4.485	0	103		84	109.256	0.361	0	11		4.124	0.49609		84	109.256	3.97	0	49		3.609	0.920194	0.995844			0.496557	0.496557
		85	109.256	4.499	0	78		85	109.256	0.347	0	11		4.152	0.499459		85	109.256	3.941	0	49		3.594	0.916369	1.00723			0.499929	0.499929
		86	109.256	4.529	0	83		86	109.256	0.344	0	9		4.185	0.503428		86	109.256	3.964	0	43		3.62	0.922998	0.99337			0.503902	0.503902
		87	109.256	4.498	0	77		87	109.256	0.335	0	8		4.163	0.500782		87	109.256	3.931	0	43		3.596	0.916879	1.01641			0.501253	0.501253
		88	109.256	4.606	0	94		88	109.256	0.322	0	9		4.284	0.515337		88	109.256	3.977	0	45		3.655	0.931922	0.974829			0.515822	0.515822
		89	109.256	4.653	0	106		89	109.256	0.339	0	8		4.314	0.518946		89	109.256	3.902	0	46		3.563	0.908465	1.00533			0.519435	0.519435
		90	109.256	4.631	0	92		90	109.256	0.35	0	11		4.281	0.514977		90	109.256	3.932	0	49		3.582	0.91331	0.977387			0.515461	0.515461
		91	109.256	4.455	0	79		91	109.256	0.349	0	11		4.106	0.493925		91	109.256	3.85	0	45		3.501	0.892657	1.01314			0.49439	0.49439
		92	109.256	4.482	0	78		92	109.256	0.353	0	8		4.129	0.496692		92	109.256	3.9	0	45		3.547	0.904386	1.02171			0.497159	0.497159
		93	109.256	4.573	0	95		93	109.256	0.346	0	11		4.227	0.508481		93	109.256	3.97	0	54		3.624	0.924018	0.967991			0.508959	0.508959
		94	109.256	4.526	0	77		94	109.256	0.396	0	9		4.13	0.496812		94	109.256	3.904	0	48		3.508	0.894442	1.00542			0.49728	0.49728
		95	109.256	4.564	0	98		95	109.256	0.346	0	11		4.218	0.507398		95	109.256	3.873	0	48		3.527	0.899286	0			0.507876	0.507876
phNpn2wt_Neuron5_FRAP		Section	Area	Mean	Min	Max		Background	Area	Mean	Min	Max		Adjusted F	%		Control	Area	Mean	Min	Max		Adjusted F	%	change	ave change		corrected F	corrected%
	0	1	67.294	10.769	0	255		1	76.257	0.329	0	7		10.44	1		1	76.257	12.858	0	185		12.529	1	0.994094	0.998601		1	1
	0.5	2	67.294	10.907	0	255		2	76.257	0.349	0	12		10.558	1.0113		2	76.257	12.804	0	184		12.455	0.994094	0.984585			1.01272	1.01272
	1	3	67.294	10.968	0	249		3	76.257	0.321	0	12		10.647	1.01983		3	76.257	12.584	0	170		12.263	0.978769	1.04208			1.02126	1.02126
	1.5	4	67.294	10.887	0	255		4	76.257	0.336	0	9		10.551	1.01063		4	76.257	13.115	0	186		12.779	1.01995	0.964551			1.01205	1.01205
	2	5	67.294	10.7	0	255		5	76.257	0.339	0	7		10.361	0.992433		5	76.257	12.665	0	171		12.326	0.983798	1.01274			0.993823	0.993823
	2.5	6	67.294	2.211	0	55		6	76.257	0.347	0	10		1.864	0.178544		6	76.257	12.83	0	151		12.483	0.996329	0.99247			0.178794	0.178794
	3	7	67.294	2.371	0	46		7	76.257	0.355	0	8		2.016	0.193103		7	76.257	12.744	0	178		12.389	0.988826	1.00622			0.193374	0.193374
	3.5	8	67.294	2.405	0	45		8	76.257	0.349	0	8		2.056	0.196935		8	76.257	12.815	0	164		12.466	0.994972	0.987245			0.197211	0.197211
	4	9	67.294	2.437	0	42		9	76.257	0.355	0	8		2.082	0.199425		9	76.257	12.662	0	160		12.307	0.982281	1.00414			0.199705	0.199705
	4.5	10	67.294	2.562	0	58		10	76.257	0.369	0	9		2.193	0.210057		10	76.257	12.727	0	180		12.358	0.986352	0.990209			0.210352	0.210352
	5	11	67.294	2.52	0	53		11	76.257	0.31	0	8		2.21	0.211686		11	76.257	12.547	0	173		12.237	0.976694	0.956198			0.211982	0.211982
	5.5	12	67.294	2.597	0	60		12	76.257	0.327	0	13		2.27	0.217433		12	76.257	12.028	0	170		11.701	0.933913	1.00812			0.217738	0.217738
	6	13	67.294	2.562	0	72		13	76.257	0.341	0	12		2.221	0.212739		13	76.257	12.137	0	176		11.796	0.941496	0.977111			0.213038	0.213038
	6.5	14	67.294	2.614	0	67		14	76.257	0.32	0	12		2.294	0.219732		14	76.257	11.846	0	164		11.526	0.919946	1.0249			0.22004	0.22004
	7	15	67.294	2.619	0	72		15	76.257	0.35	0	8		2.269	0.217337		15	76.257	12.163	0	155		11.813	0.942853	1.00567			0.217642	0.217642
	7.5	16	67.294	2.65	0	53		16	76.257	0.351	0	7		2.299	0.220211		16	76.257	12.231	0	147		11.88	0.9482	0.995539			0.220519	0.220519
	8	17	67.294	2.648	0	45		17	76.257	0.335	0	8		2.313	0.221552		17	76.257	12.162	0	181		11.827	0.94397	1.0241			0.221862	0.221862
	8.5	18	67.294	2.633	0	48		18	76.257	0.342	0	9		2.291	0.219444		18	76.257	12.454	0	192		12.112	0.966717	0.981423			0.219752	0.219752
	9	19	67.294	2.605	0	47		19	76.257	0.358	0	9		2.247	0.21523		19	76.257	12.245	0	160		11.887	0.948759	1.00219			0.215531	0.215531
	9.5	20	67.294	2.623	0	46		20	76.257	0.351	0	10		2.272	0.217625		20	76.257	12.264	0	168		11.913	0.950834	0.991354			0.217929	0.217929
	10	21	67.294	2.544	0	42		21	76.257	0.346	0	11		2.198	0.210536		21	76.257	12.156	0	174		11.81	0.942613	0.997714			0.210831	0.210831
	10.5	22	67.294	2.594	0	48		22	76.257	0.335	0	8		2.259	0.216379		22	76.257	12.118	0	150		11.783	0.940458	0.973521			0.216682	0.216682
	11	23	67.294	2.587	0	70		23	76.257	0.36	0	8		2.227	0.213314		23	76.257	11.831	0	149		11.471	0.915556	0.999303			0.213613	0.213613
	11.5	24	67.294	2.627	0	63		24	76.257	0.357	0	9		2.27	0.217433		24	76.257	11.82	0	144		11.463	0.914917	1.0116			0.217738	0.217738
	12	25	67.294	2.632	0	58		25	76.257	0.345	0	13		2.287	0.219061		25	76.257	11.941	0	168		11.596	0.925533	0.992066			0.219368	0.219368
	12.5	26	67.294	2.601	0	52		26	76.257	0.337	0	6		2.264	0.216858		26	76.257	11.841	0	160		11.504	0.91819	1.01287			0.217162	0.217162
	13	27	67.294	2.619	0	48		27	76.257	0.334	0	9		2.285	0.21887		27	76.257	11.986	0	177		11.652	0.930002	1.03836			0.219176	0.219176
	13.5	28	67.294	2.641	0	50		28	76.257	0.32	0	8		2.321	0.222318		28	76.257	12.419	0	176		12.099	0.96568	0.96851			0.222629	0.222629
	14	29	67.294	2.657	0	50		29	76.257	0.31	0	8		2.347	0.224808		29	76.257	12.028	0	174		11.718	0.93527	1.00896			0.225123	0.225123
	14.5	30	67.294	2.62	0	55		30	76.257	0.299	0	9		2.321	0.222318		30	76.257	12.122	0	168		11.823	0.943651	0.976909			0.222629	0.222629
	15	31	67.294	2.636	0	43		31	76.257	0.312	0	8		2.324	0.222605		31	76.257	11.862	0	178		11.55	0.921861	0.978615			0.222917	0.222917
	15.5	32	67.294	2.691	0	40		32	76.257	0.314	0	7		2.377	0.227682		32	76.257	11.617	0	153		11.303	0.902147	1.01389			0.228001	0.228001
	16	33	67.294	2.709	0	47		33	76.257	0.307	0	9		2.402	0.230077		33	76.257	11.767	0	155		11.46	0.914678	1.04817			0.230399	0.230399
	16.5	34	67.294	2.65	0	58		34	76.257	0.303	0	10		2.347	0.224808		34	76.257	12.315	0	154		12.012	0.958736	1.0194			0.225123	0.225123
	17	35	67.294	2.778	0	47		35	76.257	0.294	0	8		2.484	0.237931		35	76.257	12.539	0	165		12.245	0.977333	0.989138			0.238264	0.238264
	17.5	36	67.294	2.649	0	53		36	76.257	0.329	0	8		2.32	0.222222		36	76.257	12.441	0	154		12.112	0.966717	0.998514			0.222534	0.222534
		37	67.294	2.658	0	53		37	76.257	0.321	0	8		2.337	0.223851		37	76.257	12.415	0	175		12.094	0.965281	0.999339			0.224164	0.224164
		38	67.294	2.682	0	52		38	76.257	0.327	0	9		2.355	0.225575		38	76.257	12.413	0	199		12.086	0.964642	0.976915			0.225891	0.225891
		39	67.294	2.72	0	49		39	76.257	0.38	0	9		2.34	0.224138		39	76.257	12.187	0	169		11.807	0.942374	0.981113			0.224452	0.224452
		40	67.294	2.652	0	49		40	76.257	0.344	0	6		2.308	0.221073		40	76.257	11.928	0	170		11.584	0.924575	1.01787			0.221383	0.221383
		41	67.294	2.668	0	49		41	76.257	0.321	0	9		2.347	0.224808		41	76.257	12.112	0	183		11.791	0.941097	1.00153			0.225123	0.225123
		42	67.294	2.626	0	46		42	76.257	0.345	0	8		2.281	0.218487		42	76.257	12.154	0	152		11.809	0.942533	0.995173			0.218793	0.218793
		43	67.294	2.652	0	49		43	76.257	0.327	0	8		2.325	0.222701		43	76.257	12.079	0	196		11.752	0.937984	1.00213			0.223013	0.223013
		44	67.294	2.684	0	52		44	76.257	0.338	0	9		2.346	0.224713		44	76.257	12.115	0	227		11.777	0.939979	0.991084			0.225027	0.225027
		45	67.294	2.636	0	44		45	76.257	0.325	0	7		2.311	0.22136		45	76.257	11.997	0	203		11.672	0.931599	0.99109			0.22167	0.22167
		46	67.294	2.643	0	50		46	76.257	0.336	0	9		2.307	0.220977		46	76.257	11.904	0	175		11.568	0.923298	0.970349			0.221287	0.221287
		47	67.294	2.643	0	55		47	76.257	0.338	0	7		2.305	0.220785		47	76.257	11.563	0	156		11.225	0.895921	1.01514			0.221095	0.221095
		48	67.294	2.66	0	55		48	76.257	0.323	0	7		2.337	0.223851		48	76.257	11.718	0	157		11.395	0.90949	1.00491			0.224164	0.224164
		49	67.294	2.593	0	47		49	76.257	0.326	0	8		2.267	0.217146		49	76.257	11.777	0	149		11.451	0.91396	1.01223			0.21745	0.21745
		50	67.294	2.719	0	48		50	76.257	0.318	0	11		2.401	0.229981		50	76.257	11.909	0	156		11.591	0.925134	1.00587			0.230303	0.230303
		51	67.294	2.621	0	46		51	76.257	0.285	0	8		2.336	0.223755		51	76.257	11.944	0	139		11.659	0.930561	0.956943			0.224068	0.224068
		52	67.294	2.678	0	54		52	76.257	0.284	0	6		2.394	0.22931		52	76.257	11.441	0	148		11.157	0.890494	0.995698			0.229632	0.229632
		53	67.294	2.691	0	44		53	76.257	0.28	0	8		2.411	0.230939		53	76.257	11.389	0	160		11.109	0.886663	0.985057			0.231262	0.231262
		54	67.294	2.573	0	66		54	76.257	0.312	0	6		2.261	0.216571		54	76.257	11.255	0	138		10.943	0.873414	1.02065			0.216874	0.216874
		55	67.294	2.578	0	56		55	76.257	0.317	0	6		2.261	0.216571		55	76.257	11.486	0	146		11.169	0.891452	0.999642			0.216874	0.216874
		56	67.294	2.584	0	50		56	76.257	0.309	0	8		2.275	0.217912		56	76.257	11.474	0	156		11.165	0.891133	1.03511			0.218217	0.218217
		57	67.294	2.566	0	55		57	76.257	0.286	0	6		2.28	0.218391		57	76.257	11.843	0	165		11.557	0.92242	1.00372			0.218697	0.218697
		58	67.294	2.534	0	49		58	76.257	0.299	0	7		2.235	0.21408		58	76.257	11.899	0	159		11.6	0.925852	0.983103			0.21438	0.21438
		59	67.294	2.573	0	51		59	76.257	0.309	0	10		2.264	0.216858		59	76.257	11.713	0	161		11.404	0.910208	0.99544			0.217162	0.217162
		60	67.294	2.544	0	57		60	76.257	0.314	0	7		2.23	0.213602		60	76.257	11.666	0	130		11.352	0.906058	1.01224			0.213901	0.213901
		61	67.294	2.647	0	83		61	76.257	0.32	0	5		2.327	0.222893		61	76.257	11.811	0	153		11.491	0.917152	0.989644			0.223205	0.223205
		62	67.294	2.657	0	64		62	76.257	0.295	0	6		2.362	0.226245		62	76.257	11.667	0	136		11.372	0.907654	0.996131			0.226562	0.226562
		63	67.294	2.589	0	56		63	76.257	0.29	0	7		2.299	0.220211		63	76.257	11.618	0	148		11.328	0.904142	0.991261			0.220519	0.220519
		64	67.294	2.625	0	78		64	76.257	0.269	0	7		2.356	0.22567		64	76.257	11.498	0	147		11.229	0.896241	0.988156			0.225987	0.225987
		65	67.294	2.544	0	52		65	76.257	0.321	0	8		2.223	0.212931		65	76.257	11.417	0	136		11.096	0.885625	1.02614			0.213229	0.213229
		66	67.294	2.508	0	67		66	76.257	0.28	0	7		2.228	0.21341		66	76.257	11.666	0	143		11.386	0.908772	0.995784			0.213709	0.213709
		67	67.294	2.563	0	52		67	76.257	0.287	0	7		2.276	0.218008		67	76.257	11.625	0	147		11.338	0.904941	0.982007			0.218313	0.218313
		68	67.294	2.568	0	63		68	76.257	0.287	0	6		2.281	0.218487		68	76.257	11.421	0	174		11.134	0.888658	1.00575			0.218793	0.218793
		69	67.294	2.551	0	53		69	76.257	0.28	0	8		2.271	0.217529		69	76.257	11.478	0	159		11.198	0.893766	1.02643			0.217833	0.217833
		70	67.294	2.546	0	55		70	76.257	0.288	0	7		2.258	0.216284		70	76.257	11.782	0	209		11.494	0.917392	0.980599			0.216587	0.216587
		71	67.294	2.46	0	59		71	76.257	0.315	0	9		2.145	0.20546		71	76.257	11.586	0	181		11.271	0.899593	0.984207			0.205748	0.205748
		72	67.294	2.485	0	59		72	76.257	0.327	0	7		2.158	0.206705		72	76.257	11.42	0	217		11.093	0.885386	0.96926			0.206995	0.206995
		73	67.294	2.515	0	52		73	76.257	0.288	0	6		2.227	0.213314		73	76.257	11.04	0	218		10.752	0.858169	1.01404			0.213613	0.213613
		74	67.294	2.596	0	45		74	76.257	0.296	0	9		2.3	0.220307		74	76.257	11.199	0	185		10.903	0.870221	1.00174			0.220615	0.220615
		75	67.294	2.503	0	49		75	76.257	0.298	0	7		2.205	0.211207		75	76.257	11.22	0	204		10.922	0.871738	0.971251			0.211503	0.211503
		76	67.294	2.471	0	52		76	76.257	0.294	0	7		2.177	0.208525		76	76.257	10.902	0	144		10.608	0.846676	1.02149			0.208817	0.208817
		77	67.294	2.477	0	59		77	76.257	0.263	0	9		2.214	0.212069		77	76.257	11.099	0	170		10.836	0.864873	0.971115			0.212366	0.212366
		78	67.294	2.428	0	64		78	76.257	0.282	0	8		2.146	0.205556		78	76.257	10.805	0	174		10.523	0.839891	1.02613			0.205844	0.205844
		79	67.294	2.503	0	60		79	76.257	0.315	0	7		2.188	0.209579		79	76.257	11.113	0	158		10.798	0.861841	0.982312			0.209872	0.209872
		80	67.294	2.411	0	53		80	76.257	0.274	0	9		2.137	0.204693		80	76.257	10.881	0	143		10.607	0.846596	0.997455			0.20498	0.20498
		81	67.294	2.527	0	48		81	76.257	0.266	0	7		2.261	0.216571		81	76.257	10.846	0	138		10.58	0.844441	0.991493			0.216874	0.216874
		82	67.294	2.493	0	50		82	76.257	0.305	0	11		2.188	0.209579		82	76.257	10.795	0	149		10.49	0.837258	1.00334			0.209872	0.209872
		83	67.294	2.478	0	40		83	76.257	0.296	0	7		2.182	0.209004		83	76.257	10.821	0	170		10.525	0.840051	0.992779			0.209297	0.209297
		84	67.294	2.508	0	45		84	76.257	0.28	0	5		2.228	0.21341		84	76.257	10.729	0	173		10.449	0.833985	1.00852			0.213709	0.213709
		85	67.294	2.604	0	49		85	76.257	0.253	0	7		2.351	0.225192		85	76.257	10.791	0	150		10.538	0.841089	0.990985			0.225507	0.225507
		86	67.294	2.464	0	50		86	76.257	0.262	0	11		2.202	0.21092		86	76.257	10.705	0	148		10.443	0.833506	1.00239			0.211215	0.211215
		87	67.294	2.526	0	45		87	76.257	0.273	0	6		2.253	0.215805		87	76.257	10.741	0	144		10.468	0.835502	1.03038			0.216107	0.216107
		88	67.294	2.735	0	72		88	76.257	0.26	0	6		2.475	0.237069		88	76.257	11.046	0	249		10.786	0.860883	0.982848			0.237401	0.237401
		89	67.294	2.554	0	48		89	76.257	0.259	0	6		2.295	0.219828		89	76.257	10.86	0	131		10.601	0.846117	1.02094			0.220136	0.220136
		90	67.294	2.576	0	45		90	76.257	0.274	0	5		2.302	0.220498		90	76.257	11.097	0	161		10.823	0.863836	0.974684			0.220807	0.220807
		91	67.294	2.559	0	50		91	76.257	0.288	0	6		2.271	0.217529		91	76.257	10.837	0	162		10.549	0.841967	1.01185			0.217833	0.217833
		92	67.294	2.551	0	53		92	76.257	0.295	0	13		2.256	0.216092		92	76.257	10.969	0	146		10.674	0.851943	1.01199			0.216395	0.216395
		93	67.294	2.564	0	44		93	76.257	0.281	0	6		2.283	0.218678		93	76.257	11.083	0	163		10.802	0.86216	0.996297			0.218985	0.218985
		94	67.294	2.5	0	40		94	76.257	0.275	0	10		2.225	0.213123		94	76.257	11.037	0	144		10.762	0.858967	1.00427			0.213421	0.213421
		95	67.294	2.533	0	39		95	76.257	0.268	0	6		2.265	0.216954		95	76.257	11.076	0	151		10.808	0.862639	0			0.217258	0.217258

## Sheet: TCS 8-11-14
phNpn2TCS_Neuron1_FRAP		Section	Area	Mean	Min	Max		Background	Area	Mean	Min	Max		Adjusted F	%		Control	Area	Mean	Min	Max		Adjusted F	%	change	ave change		corrected F	corrected%
		1	73.964	14.123	0	255		1	93.291	0.143	0	6		13.98	1		1	93.291	42.336	2	149		42.193	1	0.995402	0.997929		1	1
		2	73.964	13.695	0	255		2	93.291	0.151	0	7		13.544	0.968813		2	93.291	42.15	1	135		41.999	0.995402	0.982714			0.970823	0.970823
		3	73.964	13.605	0	255		3	93.291	0.14	0	5		13.465	0.963162		3	93.291	41.413	0	138		41.273	0.978195	1.01134			0.965161	0.965161
		4	73.964	13.193	0	255		4	93.291	0.127	0	5		13.066	0.934621		4	93.291	41.868	2	132		41.741	0.989287	0.979708			0.936561	0.936561
		5	73.964	12.947	0	255		5	93.291	0.129	0	4		12.818	0.916881		5	93.291	41.023	3	122		40.894	0.969213	0.995843			0.918784	0.918784
		6	73.964	5.903	0	95		6	93.291	0.149	0	5		5.754	0.411588		6	93.291	40.873	1	138		40.724	0.965184	0.985291			0.412442	0.412442
		7	73.964	6.71	0	80		7	93.291	0.105	0	2		6.605	0.472461		7	93.291	40.23	0	151		40.125	0.950987	0.997009			0.473441	0.473441
		8	73.964	7.218	0	90		8	93.291	0.124	0	3		7.094	0.507439		8	93.291	40.129	1	141		40.005	0.948143	0.982327			0.508492	0.508492
		9	73.964	7.517	0	93		9	93.291	0.122	0	3		7.395	0.52897		9	93.291	39.42	1	119		39.298	0.931387	0.988676			0.530068	0.530068
		10	73.964	7.731	0	86		10	93.291	0.138	0	3		7.593	0.543133		10	93.291	38.991	1	132		38.853	0.92084	0.997787			0.54426	0.54426
		11	73.964	8.033	0	81		11	93.291	0.117	0	4		7.916	0.566237		11	93.291	38.884	0	113		38.767	0.918802	0.988289			0.567413	0.567413
		12	73.964	8.064	0	71		12	93.291	0.125	0	3		7.939	0.567883		12	93.291	38.438	0	132		38.313	0.908042	0.986845			0.569061	0.569061
		13	73.964	8.269	0	71		13	93.291	0.14	0	3		8.129	0.581474		13	93.291	37.949	2	130		37.809	0.896097	1.00143			0.58268	0.58268
		14	73.964	8.445	0	72		14	93.291	0.132	0	4		8.313	0.594635		14	93.291	37.995	1	108		37.863	0.897376	0.995748			0.595869	0.595869
		15	73.964	8.368	0	61		15	93.291	0.121	0	4		8.247	0.589914		15	93.291	37.823	1	108		37.702	0.893561	1.00241			0.591139	0.591139
		16	73.964	8.367	0	85		16	93.291	0.124	0	7		8.243	0.589628		16	93.291	37.917	0	125		37.793	0.895717	0.989151			0.590852	0.590852
		17	73.964	8.71	0	94		17	93.291	0.126	0	6		8.584	0.61402		17	93.291	37.509	0	136		37.383	0.886	0.995586			0.615294	0.615294
		18	73.964	8.811	0	72		18	93.291	0.13	0	5		8.681	0.620959		18	93.291	37.348	0	142		37.218	0.882089	0.996856			0.622247	0.622247
		19	73.964	8.666	0	89		19	93.291	0.133	0	5		8.533	0.610372		19	93.291	37.234	0	140		37.101	0.879316	0.991078			0.611639	0.611639
		20	73.964	9.109	0	77		20	93.291	0.129	0	3		8.98	0.642346		20	93.291	36.899	0	113		36.77	0.871472	0.99864			0.643679	0.643679
		21	73.964	9.048	0	85		21	93.291	0.148	0	3		8.9	0.636624		21	93.291	36.868	0	156		36.72	0.870287	1.00678			0.637945	0.637945
		22	73.964	9.244	0	67		22	93.291	0.137	0	4		9.107	0.651431		22	93.291	37.106	0	135		36.969	0.876188	0.995402			0.652783	0.652783
		23	73.964	9.54	0	72		23	93.291	0.123	0	3		9.417	0.673605		23	93.291	36.922	0	140		36.799	0.872159	0.992418			0.675003	0.675003
		24	73.964	9.722	0	76		24	93.291	0.108	0	2		9.614	0.687697		24	93.291	36.628	1	116		36.52	0.865546	0.99592			0.689124	0.689124
		25	73.964	9.624	0	79		25	93.291	0.136	0	4		9.488	0.678684		25	93.291	36.507	0	122		36.371	0.862015	1.00038			0.680092	0.680092
		26	73.964	9.843	0	74		26	93.291	0.139	0	4		9.704	0.694134		26	93.291	36.524	0	139		36.385	0.862347	1.00563			0.695575	0.695575
		27	73.964	9.744	0	79		27	93.291	0.147	0	4		9.597	0.686481		27	93.291	36.737	0	125		36.59	0.867205	0.997622			0.687906	0.687906
		28	73.964	9.536	0	69		28	93.291	0.134	0	5		9.402	0.672532		28	93.291	36.637	0	145		36.503	0.865144	1.00066			0.673928	0.673928
		29	73.964	9.801	0	73		29	93.291	0.136	0	5		9.665	0.691345		29	93.291	36.663	0	164		36.527	0.865712	0.993731			0.69278	0.69278
		30	73.964	9.831	0	83		30	93.291	0.124	0	4		9.707	0.694349		30	93.291	36.422	1	125		36.298	0.860285	1.00094			0.69579	0.69579
		31	73.964	9.935	0	72		31	93.291	0.129	0	5		9.806	0.701431		31	93.291	36.461	0	138		36.332	0.861091	1.00116			0.702886	0.702886
		32	73.964	10.026	0	71		32	93.291	0.119	0	5		9.907	0.708655		32	93.291	36.493	0	121		36.374	0.862086	1.005			0.710126	0.710126
		33	73.964	9.756	0	69		33	93.291	0.122	0	12		9.634	0.689127		33	93.291	36.678	1	143		36.556	0.8664	1.00397			0.690558	0.690558
		34	73.964	9.623	0	79		34	93.291	0.122	0	5		9.501	0.679614		34	93.291	36.823	0	142		36.701	0.869836	0.993842			0.681024	0.681024
		35	73.964	9.73	0	72		35	93.291	0.135	0	4		9.595	0.686338		35	93.291	36.61	1	134		36.475	0.86448	1.00502			0.687762	0.687762
		36	73.964	9.722	0	67		36	93.291	0.138	0	5		9.584	0.685551		36	93.291	36.796	0	171		36.658	0.868817	1.00101			0.686974	0.686974
		37	73.964	9.871	0	71		37	93.291	0.139	0	5		9.732	0.696137		37	93.291	36.834	1	153		36.695	0.869694	0.989018			0.697582	0.697582
		38	73.964	9.681	0	74		38	93.291	0.117	0	4		9.564	0.68412		38	93.291	36.409	0	128		36.292	0.860143	1.00835			0.68554	0.68554
		39	73.964	9.557	0	71		39	93.291	0.13	0	5		9.427	0.67432		39	93.291	36.725	2	128		36.595	0.867324	0.994781			0.67572	0.67572
		40	73.964	9.979	0	70		40	93.291	0.149	0	4		9.83	0.703147		40	93.291	36.553	1	115		36.404	0.862797	0.995248			0.704607	0.704607
		41	73.964	9.947	0	82		41	93.291	0.147	0	4		9.8	0.701001		41	93.291	36.378	1	120		36.231	0.858697	0.99183			0.702456	0.702456
		42	73.964	9.774	0	71		42	93.291	0.141	0	8		9.633	0.689056		42	93.291	36.076	1	116		35.935	0.851682	1.00749			0.690486	0.690486
		43	73.964	10.102	0	70		43	93.291	0.144	0	4		9.958	0.712303		43	93.291	36.348	1	124		36.204	0.858057	0.996161			0.713782	0.713782
		44	73.964	10.021	0	85		44	93.291	0.161	0	5		9.86	0.705293		44	93.291	36.226	0	115		36.065	0.854763	1.00438			0.706757	0.706757
		45	73.964	10.124	0	69		45	93.291	0.145	0	3		9.979	0.713805		45	93.291	36.368	0	117		36.223	0.858507	0.997267			0.715287	0.715287
		46	73.964	10.02	0	80		46	93.291	0.141	0	5		9.879	0.706652		46	93.291	36.265	0	132		36.124	0.856161	0.996069			0.708119	0.708119
		47	73.964	9.876	0	75		47	93.291	0.135	0	5		9.741	0.696781		47	93.291	36.117	0	119		35.982	0.852795	0.994636			0.698227	0.698227
		48	73.964	9.805	0	79		48	93.291	0.152	0	5		9.653	0.690486		48	93.291	35.941	0	113		35.789	0.848221	1.00849			0.69192	0.69192
		49	73.964	9.587	0	87		49	93.291	0.139	0	4		9.448	0.675823		49	93.291	36.232	0	105		36.093	0.855426	1.00114			0.677225	0.677225
		50	73.964	9.588	0	74		50	93.291	0.14	0	4		9.448	0.675823		50	93.291	36.274	0	113		36.134	0.856398	0.99726			0.677225	0.677225
		51	73.964	9.765	0	85		51	93.291	0.134	0	4		9.631	0.688913		51	93.291	36.169	0	102		36.035	0.854052	1.00394			0.690343	0.690343
		52	73.964	9.209	0	97		52	93.291	0.139	0	4		9.07	0.648784		52	93.291	36.316	0	109		36.177	0.857417	1.00055			0.650131	0.650131
		53	73.964	9.339	0	78		53	93.291	0.116	0	4		9.223	0.659728		53	93.291	36.313	0	125		36.197	0.857891	1.00022			0.661097	0.661097
		54	73.964	9.401	0	88		54	93.291	0.129	0	5		9.272	0.663233		54	93.291	36.334	1	117		36.205	0.858081	0.996382			0.66461	0.66461
		55	73.964	9.354	0	82		55	93.291	0.116	0	5		9.238	0.660801		55	93.291	36.19	0	124		36.074	0.854976	0.993014			0.662173	0.662173
		56	73.964	9.168	0	103		56	93.291	0.128	0	8		9.04	0.646638		56	93.291	35.95	0	126		35.822	0.849003	0.988973			0.64798	0.64798
		57	73.964	9.358	0	76		57	93.291	0.118	0	5		9.24	0.660944		57	93.291	35.545	0	114		35.427	0.839642	0.994298			0.662316	0.662316
		58	73.964	9.344	0	90		58	93.291	0.125	0	5		9.219	0.659442		58	93.291	35.35	1	123		35.225	0.834854	1.01025			0.660811	0.660811
		59	73.964	9.44	0	95		59	93.291	0.139	0	12		9.301	0.665308		59	93.291	35.725	0	123		35.586	0.84341	1.00076			0.666688	0.666688
		60	73.964	9.758	0	107		60	93.291	0.147	0	3		9.611	0.687482		60	93.291	35.76	0	121		35.613	0.84405	0.998512			0.688909	0.688909
		61	73.964	9.631	0	83		61	93.291	0.153	0	4		9.478	0.677969		61	93.291	35.713	1	115		35.56	0.842794	0.999184			0.679376	0.679376
		62	73.964	9.571	0	80		62	93.291	0.139	0	5		9.432	0.674678		62	93.291	35.67	1	103		35.531	0.842107	1.0029			0.676078	0.676078
		63	73.964	9.333	0	89		63	93.291	0.158	0	4		9.175	0.656295		63	93.291	35.792	1	100		35.634	0.844548	0.991749			0.657657	0.657657
		64	73.964	9.431	0	78		64	93.291	0.155	0	6		9.276	0.663519		64	93.291	35.495	0	105		35.34	0.83758	1.00048			0.664896	0.664896
		65	73.964	9.327	0	77		65	93.291	0.139	0	4		9.188	0.657225		65	93.291	35.496	1	121		35.357	0.837983	1.00337			0.658589	0.658589
		66	73.964	9.128	0	87		66	93.291	0.137	0	4		8.991	0.643133		66	93.291	35.613	0	123		35.476	0.840803	1.00885			0.644468	0.644468
		67	73.964	9.2	0	73		67	93.291	0.125	0	6		9.075	0.649142		67	93.291	35.915	0	129		35.79	0.848245	0.999301			0.650489	0.650489
		68	73.964	9.167	0	80		68	93.291	0.129	0	5		9.038	0.646495		68	93.291	35.894	0	121		35.765	0.847652	1.00285			0.647837	0.647837
		69	73.964	9.021	0	86		69	93.291	0.121	0	7		8.9	0.636624		69	93.291	35.988	0	124		35.867	0.85007	1.00128			0.637945	0.637945
		70	73.964	8.971	0	86		70	93.291	0.129	0	5		8.842	0.632475		70	93.291	36.042	0	121		35.913	0.85116	0.992732			0.633788	0.633788
		71	73.964	8.891	0	84		71	93.291	0.127	0	5		8.764	0.626896		71	93.291	35.779	0	112		35.652	0.844974	1.00157			0.628197	0.628197
		72	73.964	8.947	0	90		72	93.291	0.123	0	5		8.824	0.631187		72	93.291	35.831	0	111		35.708	0.846302	1.00756			0.632497	0.632497
		73	73.964	9.044	0	84		73	93.291	0.153	0	5		8.891	0.63598		73	93.291	36.131	0	105		35.978	0.852701	0.98891			0.6373	0.6373
		74	73.964	9.113	0	90		74	93.291	0.126	0	4		8.987	0.642847		74	93.291	35.705	0	94		35.579	0.843244	0.995896			0.644181	0.644181
		75	73.964	9.163	0	86		75	93.291	0.131	0	4		9.032	0.646066		75	93.291	35.564	0	91		35.433	0.839784	0.993622			0.647407	0.647407
		76	73.964	9.039	0	89		76	93.291	0.132	0	4		8.907	0.637124		76	93.291	35.339	0	100		35.207	0.834428	1.00185			0.638447	0.638447
		77	73.964	9.347	0	69		77	93.291	0.126	0	4		9.221	0.659585		77	93.291	35.398	0	108		35.272	0.835968	1.00471			0.660954	0.660954
		78	73.964	9.11	0	77		78	93.291	0.137	0	3		8.973	0.641845		78	93.291	35.575	0	99		35.438	0.839902	0.99303			0.643178	0.643178
		79	73.964	9.264	0	96		79	93.291	0.134	0	3		9.13	0.653076		79	93.291	35.325	0	97		35.191	0.834048	1.00841			0.654431	0.654431
		80	73.964	9.51	0	85		80	93.291	0.126	0	5		9.384	0.671245		80	93.291	35.613	0	98		35.487	0.841064	0.999296			0.672638	0.672638
		81	73.964	9.752	0	92		81	93.291	0.135	0	4		9.617	0.687911		81	93.291	35.597	0	96		35.462	0.840471	0.999605			0.689339	0.689339
		82	73.964	9.367	0	78		82	93.291	0.131	0	5		9.236	0.660658		82	93.291	35.579	0	105		35.448	0.840139	0.998505			0.662029	0.662029
		83	73.964	9.306	0	92		83	93.291	0.133	0	5		9.173	0.656152		83	93.291	35.528	0	98		35.395	0.838883	0.995367			0.657514	0.657514
		84	73.964	9.248	0	95		84	93.291	0.119	0	4		9.129	0.653004		84	93.291	35.35	0	101		35.231	0.834996	0.99455			0.65436	0.65436
		85	73.964	9.378	0	105		85	93.291	0.128	0	5		9.25	0.66166		85	93.291	35.167	0	107		35.039	0.830446	0.993265			0.663033	0.663033
		86	73.964	9.235	0	104		86	93.291	0.116	0	5		9.119	0.652289		86	93.291	34.919	0	142		34.803	0.824852	0.999195			0.653643	0.653643
		87	73.964	9.562	0	111		87	93.291	0.112	0	5		9.45	0.675966		87	93.291	34.887	0	129		34.775	0.824189	0.997498			0.677369	0.677369
		88	73.964	9.428	0	93		88	93.291	0.126	0	5		9.302	0.665379		88	93.291	34.814	0	115		34.688	0.822127	1.00891			0.66676	0.66676
		89	73.964	9.363	0	94		89	93.291	0.143	0	3		9.22	0.659514		89	93.291	35.14	0	110		34.997	0.82945	0.995028			0.660882	0.660882
		90	73.964	9.602	0	103		90	93.291	0.152	0	6		9.45	0.675966		90	93.291	34.975	0	126		34.823	0.825326	0.999454			0.677369	0.677369
		91	73.964	9.546	0	92		91	93.291	0.135	0	4		9.411	0.673176		91	93.291	34.939	0	109		34.804	0.824876	1.00109			0.674573	0.674573
		92	73.964	9.629	0	112		92	93.291	0.135	0	4		9.494	0.679113		92	93.291	34.977	0	107		34.842	0.825777	1.00445			0.680523	0.680523
		93	73.964	9.366	0	90		93	93.291	0.129	0	3		9.237	0.66073		93	93.291	35.126	0	97		34.997	0.82945	0.995628			0.662101	0.662101
		94	73.964	9.335	0	98		94	93.291	0.129	0	4		9.206	0.658512		94	93.291	34.973	0	100		34.844	0.825824	0.994576			0.659879	0.659879
		95	73.964	9.647	0	100		95	93.291	0.133	0	5		9.514	0.680544		95	93.291	34.788	0	120		34.655	0.821345	0			0.681956	0.681956
phNpn2TCS_Neuron2_FRAP		Section	Area	Mean	Min	Max		Background	Area	Mean	Min	Max		Adjusted F	%		Control	Area	Mean	Min	Max		Adjusted F	%	change	ave change		corrected F	corrected%
		1	171.578	15.45	0	217		1	196.7	0.203	0	8		15.247	1		1	196.7	11.057	0	239		10.854	1	1.00341	0.998647		1	1
		2	171.578	15.304	0	207		2	196.7	0.216	0	10		15.088	0.989572		2	196.7	11.107	0	234		10.891	1.00341	1.00578			0.990912	0.990912
		3	171.578	15.193	0	185		3	196.7	0.236	0	6		14.957	0.98098		3	196.7	11.19	0	241		10.954	1.00921	0.98229			0.982309	0.982309
		4	171.578	15.07	0	203		4	196.7	0.196	0	5		14.874	0.975536		4	196.7	10.956	0	229		10.76	0.99134	0.995911			0.976858	0.976858
		5	171.578	15.232	0	196		5	196.7	0.201	0	8		15.031	0.985833		5	196.7	10.917	0	213		10.716	0.987286	1.0181			0.987169	0.987169
		6	171.578	7.113	0	67		6	196.7	0.198	0	6		6.915	0.453532		6	196.7	11.108	0	213		10.91	1.00516	0.999817			0.454146	0.454146
		7	171.578	7.828	0	75		7	196.7	0.196	0	7		7.632	0.500557		7	196.7	11.104	0	199		10.908	1.00498	0.994041			0.501236	0.501236
		8	171.578	8.279	0	95		8	196.7	0.211	0	6		8.068	0.529153		8	196.7	11.054	0	206		10.843	0.998987	0.986904			0.52987	0.52987
		9	171.578	8.748	0	126		9	196.7	0.228	0	4		8.52	0.558798		9	196.7	10.929	0	207		10.701	0.985904	1.03215			0.559556	0.559556
		10	171.578	9.061	0	122		10	196.7	0.192	0	6		8.869	0.581688		10	196.7	11.237	0	233		11.045	1.0176	0.986781			0.582476	0.582476
		11	171.578	9.294	0	134		11	196.7	0.175	0	7		9.119	0.598085		11	196.7	11.074	0	219		10.899	1.00415	0.997156			0.598895	0.598895
		12	171.578	9.625	0	135		12	196.7	0.181	0	7		9.444	0.619401		12	196.7	11.049	0	244		10.868	1.00129	1.0012			0.62024	0.62024
		13	171.578	9.881	0	108		13	196.7	0.172	0	8		9.709	0.636781		13	196.7	11.053	0	213		10.881	1.00249	0.966639			0.637644	0.637644
		14	171.578	10.046	0	113		14	196.7	0.189	0	6		9.857	0.646488		14	196.7	10.707	0	225		10.518	0.969044	1.0136			0.647364	0.647364
		15	171.578	10.158	0	94		15	196.7	0.188	0	4		9.97	0.653899		15	196.7	10.849	0	191		10.661	0.982219	0.981146			0.654785	0.654785
		16	171.578	10.229	0	147		16	196.7	0.191	0	6		10.038	0.658359		16	196.7	10.651	0	182		10.46	0.9637	0.99761			0.659251	0.659251
		17	171.578	10.425	0	108		17	196.7	0.188	0	6		10.237	0.671411		17	196.7	10.623	0	208		10.435	0.961397	0.998083			0.67232	0.67232
		18	171.578	10.581	0	120		18	196.7	0.173	0	3		10.408	0.682626		18	196.7	10.588	0	218		10.415	0.959554	0.991551			0.683551	0.683551
		19	171.578	10.582	0	99		19	196.7	0.174	0	5		10.408	0.682626		19	196.7	10.501	0	195		10.327	0.951446	0.996901			0.683551	0.683551
		20	171.578	10.819	0	127		20	196.7	0.176	0	5		10.643	0.698039		20	196.7	10.471	0	197		10.295	0.948498	1.01739			0.698985	0.698985
		21	171.578	10.965	0	127		21	196.7	0.185	0	4		10.78	0.707024		21	196.7	10.659	0	187		10.474	0.96499	0.993508			0.707982	0.707982
		22	171.578	10.916	0	125		22	196.7	0.189	0	5		10.727	0.703548		22	196.7	10.595	0	202		10.406	0.958725	0.99039			0.704501	0.704501
		23	171.578	10.85	0	108		23	196.7	0.171	0	4		10.679	0.7004		23	196.7	10.477	0	191		10.306	0.949512	0.996216			0.701349	0.701349
		24	171.578	11.135	0	119		24	196.7	0.183	0	5		10.952	0.718305		24	196.7	10.45	0	181		10.267	0.945919	0.988215			0.719278	0.719278
		25	171.578	11.217	0	113		25	196.7	0.215	0	6		11.002	0.721585		25	196.7	10.361	0	177		10.146	0.934771	0.994776			0.722562	0.722562
		26	171.578	11.197	0	130		26	196.7	0.182	0	8		11.015	0.722437		26	196.7	10.275	0	202		10.093	0.929888	1.00258			0.723416	0.723416
		27	171.578	11.417	0	111		27	196.7	0.186	0	5		11.231	0.736604		27	196.7	10.305	0	218		10.119	0.932283	1.01255			0.737602	0.737602
		28	171.578	11.464	0	109		28	196.7	0.199	0	5		11.265	0.738834		28	196.7	10.445	0	187		10.246	0.943984	0.993754			0.739835	0.739835
		29	171.578	11.416	0	119		29	196.7	0.197	0	6		11.219	0.735817		29	196.7	10.379	0	192		10.182	0.938087	0.995286			0.736814	0.736814
		30	171.578	11.51	0	130		30	196.7	0.188	0	8		11.322	0.742572		30	196.7	10.322	0	188		10.134	0.933665	0.989836			0.743578	0.743578
		31	171.578	11.658	0	104		31	196.7	0.187	0	8		11.471	0.752345		31	196.7	10.218	0	233		10.031	0.924175	1.01266			0.753364	0.753364
		32	171.578	11.725	0	121		32	196.7	0.181	0	6		11.544	0.757133		32	196.7	10.339	0	207		10.158	0.935876	0.984544			0.758158	0.758158
		33	171.578	11.853	0	126		33	196.7	0.184	0	5		11.669	0.765331		33	196.7	10.185	0	205		10.001	0.921411	0.997			0.766368	0.766368
		34	171.578	11.742	0	122		34	196.7	0.184	0	5		11.558	0.758051		34	196.7	10.155	0	187		9.971	0.918648	0.983051			0.759078	0.759078
		35	171.578	11.706	0	123		35	196.7	0.196	0	5		11.51	0.754903		35	196.7	9.998	0	175		9.802	0.903077	1.01285			0.755925	0.755925
		36	171.578	11.674	0	118		36	196.7	0.186	0	5		11.488	0.75346		36	196.7	10.114	0	197		9.928	0.914686	1.02307			0.75448	0.75448
		37	171.578	11.842	0	116		37	196.7	0.187	0	6		11.655	0.764413		37	196.7	10.344	0	208		10.157	0.935784	1.01132			0.765448	0.765448
		38	171.578	11.839	0	128		38	196.7	0.192	0	6		11.647	0.763888		38	196.7	10.464	0	194		10.272	0.946379	0.98715			0.764923	0.764923
		39	171.578	11.72	0	124		39	196.7	0.194	0	6		11.526	0.755952		39	196.7	10.334	0	188		10.14	0.934218	0.998126			0.756976	0.756976
		40	171.578	11.715	0	126		40	196.7	0.186	0	11		11.529	0.756149		40	196.7	10.307	0	192		10.121	0.932467	0.993479			0.757173	0.757173
		41	171.578	11.779	0	109		41	196.7	0.177	0	5		11.602	0.760937		41	196.7	10.232	0	203		10.055	0.926387	0.989359			0.761967	0.761967
		42	171.578	11.773	0	112		42	196.7	0.189	0	4		11.584	0.759756		42	196.7	10.137	0	214		9.948	0.916528	1.00915			0.760785	0.760785
		43	171.578	11.642	0	119		43	196.7	0.174	0	4		11.468	0.752148		43	196.7	10.213	0	224		10.039	0.924912	0.995916			0.753167	0.753167
		44	171.578	11.584	0	126		44	196.7	0.178	0	6		11.406	0.748082		44	196.7	10.176	0	205		9.998	0.921135	0.987698			0.749095	0.749095
		45	171.578	11.481	0	131		45	196.7	0.184	0	6		11.297	0.740933		45	196.7	10.059	0	226		9.875	0.909803	0.983899			0.741936	0.741936
		46	171.578	11.633	0	124		46	196.7	0.196	0	5		11.437	0.750115		46	196.7	9.912	0	193		9.716	0.895154	0.990737			0.751131	0.751131
		47	171.578	11.517	0	118		47	196.7	0.185	0	5		11.332	0.743228		47	196.7	9.811	0	222		9.626	0.886862	1.00956			0.744235	0.744235
		48	171.578	11.62	0	115		48	196.7	0.189	0	5		11.431	0.749721		48	196.7	9.907	0	229		9.718	0.895338	1.00669			0.750737	0.750737
		49	171.578	11.595	0	126		49	196.7	0.19	0	8		11.405	0.748016		49	196.7	9.973	0	207		9.783	0.901327	1.00153			0.749029	0.749029
		50	171.578	11.579	0	142		50	196.7	0.182	0	15		11.397	0.747491		50	196.7	9.98	0	183		9.798	0.902709	1.0001			0.748504	0.748504
		51	171.578	11.38	0	129		51	196.7	0.172	0	5		11.208	0.735095		51	196.7	9.971	0	213		9.799	0.902801	1.00847			0.736091	0.736091
		52	171.578	11.46	0	144		52	196.7	0.175	0	6		11.285	0.740146		52	196.7	10.057	0	171		9.882	0.910448	0.98219			0.741148	0.741148
		53	171.578	11.359	0	136		53	196.7	0.195	0	4		11.164	0.73221		53	196.7	9.901	0	178		9.706	0.894233	0.992273			0.733202	0.733202
		54	171.578	11.473	0	131		54	196.7	0.183	0	9		11.29	0.740474		54	196.7	9.814	0	174		9.631	0.887323	0.992005			0.741477	0.741477
		55	171.578	11.309	0	141		55	196.7	0.189	0	5		11.12	0.729324		55	196.7	9.743	0	161		9.554	0.880228	0.999477			0.730312	0.730312
		56	171.578	11.299	0	118		56	196.7	0.173	0	3		11.126	0.729717		56	196.7	9.722	0	163		9.549	0.879768	1.00346			0.730706	0.730706
		57	171.578	11.325	0	132		57	196.7	0.186	0	5		11.139	0.73057		57	196.7	9.768	0	177		9.582	0.882808	0.996243			0.73156	0.73156
		58	171.578	11.386	0	114		58	196.7	0.196	0	5		11.19	0.733915		58	196.7	9.742	0	197		9.546	0.879491	0.991515			0.734909	0.734909
		59	171.578	11.202	0	122		59	196.7	0.189	0	4		11.013	0.722306		59	196.7	9.654	0	171		9.465	0.872029	0.999683			0.723285	0.723285
		60	171.578	11.207	0	127		60	196.7	0.189	0	5		11.018	0.722634		60	196.7	9.651	0	180		9.462	0.871752	1.00845			0.723613	0.723613
		61	171.578	11.194	0	126		61	196.7	0.18	0	6		11.014	0.722372		61	196.7	9.722	0	189		9.542	0.879123	1.01038			0.72335	0.72335
		62	171.578	11.433	0	135		62	196.7	0.183	0	6		11.25	0.73785		62	196.7	9.824	0	202		9.641	0.888244	0.990561			0.73885	0.73885
		63	171.578	11.269	0	130		63	196.7	0.182	0	5		11.087	0.727159		63	196.7	9.732	0	180		9.55	0.87986	0.990681			0.728145	0.728145
		64	171.578	11.176	0	131		64	196.7	0.185	0	5		10.991	0.720863		64	196.7	9.646	0	153		9.461	0.87166	1.00592			0.72184	0.72184
		65	171.578	11.447	0	132		65	196.7	0.196	0	4		11.251	0.737916		65	196.7	9.713	0	167		9.517	0.87682	1.00074			0.738915	0.738915
		66	171.578	11.311	0	120		66	196.7	0.183	0	5		11.128	0.729848		66	196.7	9.707	0	170		9.524	0.877465	1.00189			0.730837	0.730837
		67	171.578	11.456	0	120		67	196.7	0.186	0	5		11.27	0.739162		67	196.7	9.728	0	168		9.542	0.879123	0.992874			0.740163	0.740163
		68	171.578	11.331	0	126		68	196.7	0.189	0	10		11.142	0.730767		68	196.7	9.663	0	169		9.474	0.872858	1.00982			0.731757	0.731757
		69	171.578	11.309	0	119		69	196.7	0.182	0	5		11.127	0.729783		69	196.7	9.749	0	167		9.567	0.881426	1.01474			0.730772	0.730772
		70	171.578	11.373	0	131		70	196.7	0.174	0	6		11.199	0.734505		70	196.7	9.882	0	197		9.708	0.894417	1.00391			0.7355	0.7355
		71	171.578	11.396	0	128		71	196.7	0.186	0	7		11.21	0.735227		71	196.7	9.932	0	166		9.746	0.897918	0.971989			0.736223	0.736223
		72	171.578	11.298	0	106		72	196.7	0.178	0	7		11.12	0.729324		72	196.7	9.651	0	192		9.473	0.872766	1.01953			0.730312	0.730312
		73	171.578	11.438	0	128		73	196.7	0.174	0	6		11.264	0.738768		73	196.7	9.832	0	173		9.658	0.88981	0.999689			0.739769	0.739769
		74	171.578	11.486	0	118		74	196.7	0.184	0	8		11.302	0.741261		74	196.7	9.839	0	193		9.655	0.889534	1.00653			0.742265	0.742265
		75	171.578	11.345	0	108		75	196.7	0.166	0	9		11.179	0.733193		75	196.7	9.884	0	175		9.718	0.895338	0.996604			0.734187	0.734187
		76	171.578	11.465	0	106		76	196.7	0.178	0	6		11.287	0.740277		76	196.7	9.863	0	203		9.685	0.892298	0.999793			0.74128	0.74128
		77	171.578	11.324	0	119		77	196.7	0.172	0	6		11.152	0.731423		77	196.7	9.855	0	210		9.683	0.892114	1.00981			0.732414	0.732414
		78	171.578	11.336	0	112		78	196.7	0.161	0	8		11.175	0.732931		78	196.7	9.939	0	197		9.778	0.900866	0.999182			0.733924	0.733924
		79	171.578	11.256	0	103		79	196.7	0.173	0	9		11.083	0.726897		79	196.7	9.943	0	195		9.77	0.900129	0.991095			0.727882	0.727882
		80	171.578	11.432	0	114		80	196.7	0.182	0	5		11.25	0.73785		80	196.7	9.865	0	178		9.683	0.892114	0.986574			0.73885	0.73885
		81	171.578	11.191	0	104		81	196.7	0.165	0	9		11.026	0.723159		81	196.7	9.718	0	178		9.553	0.880136	1.00513			0.724138	0.724138
		82	171.578	11.22	0	110		82	196.7	0.17	0	6		11.05	0.724733		82	196.7	9.772	0	202		9.602	0.884651	0.987294			0.725715	0.725715
		83	171.578	11.194	0	129		83	196.7	0.169	0	6		11.025	0.723093		83	196.7	9.649	0	153		9.48	0.873411	0.99789			0.724073	0.724073
		84	171.578	11.159	0	103		84	196.7	0.179	0	6		10.98	0.720142		84	196.7	9.639	0	154		9.46	0.871568	1.00761			0.721117	0.721117
		85	171.578	11.017	0	106		85	196.7	0.169	0	5		10.848	0.711484		85	196.7	9.701	0	151		9.532	0.878202	0.991817			0.712448	0.712448
		86	171.578	11.189	0	94		86	196.7	0.185	0	5		11.004	0.721716		86	196.7	9.639	0	169		9.454	0.871015	1.01946			0.722694	0.722694
		87	171.578	11.075	0	116		87	196.7	0.183	0	5		10.892	0.71437		87	196.7	9.821	0	177		9.638	0.887968	0.984644			0.715338	0.715338
		88	171.578	11.171	0	105		88	196.7	0.181	0	4		10.99	0.720798		88	196.7	9.671	0	144		9.49	0.874332	1.00253			0.721774	0.721774
		89	171.578	11.309	0	105		89	196.7	0.194	0	8		11.115	0.728996		89	196.7	9.708	0	201		9.514	0.876543	0.996531			0.729984	0.729984
		90	171.578	11.245	0	107		90	196.7	0.186	0	4		11.059	0.725323		90	196.7	9.667	0	172		9.481	0.873503	1.00443			0.726306	0.726306
		91	171.578	11.153	0	108		91	196.7	0.196	0	5		10.957	0.718633		91	196.7	9.719	0	155		9.523	0.877372	1.02405			0.719607	0.719607
		92	171.578	11.181	0	112		92	196.7	0.166	0	4		11.015	0.722437		92	196.7	9.918	0	176		9.752	0.898471	0.980004			0.723416	0.723416
		93	171.578	11.048	0	119		93	196.7	0.179	0	17		10.869	0.712862		93	196.7	9.736	0	159		9.557	0.880505	1.00701			0.713827	0.713827
		94	171.578	11	0	105		94	196.7	0.165	0	4		10.835	0.710632		94	196.7	9.789	0	138		9.624	0.886678	0.986908			0.711594	0.711594
		95	171.578	11.029	0	102		95	196.7	0.181	0	5		10.848	0.711484		95	196.7	9.679	0	132		9.498	0.875069	0			0.712448	0.712448
phNpn2TCS_Neuron3_FRAP		Section	Area	Mean	Min	Max		Background	Area	Mean	Min	Max		Adjusted F	%		Control	Area	Mean	Min	Max		Adjusted F	%	change	ave change		corrected F	corrected%
		1	171.578	40.387	0	255		1	171.578	0.344	0	31		40.043	1		1	171.578	55.422	0	255		55.078	1	0.973601	0.998545		1	1
		2	171.578	40.531	0	255		2	171.578	0.323	0	34		40.208	1.00412		2	171.578	53.947	0	255		53.624	0.973601	0.996774			1.00558	1.00558
		3	171.578	40.307	0	255		3	171.578	0.343	0	33		39.964	0.998027		3	171.578	53.794	0	255		53.451	0.97046	0.996595			0.999481	0.999481
		4	171.578	39.852	0	255		4	171.578	0.34	0	35		39.512	0.986739		4	171.578	53.609	0	255		53.269	0.967156	0.995213			0.988177	0.988177
		5	171.578	39.342	0	255		5	171.578	0.34	0	39		39.002	0.974003		5	171.578	53.354	0	255		53.014	0.962526	0.99038			0.975422	0.975422
		6	171.578	13.517	0	255		6	171.578	0.346	0	40		13.171	0.328921		6	171.578	52.85	0	255		52.504	0.953266	0.993753			0.329401	0.329401
		7	171.578	15.073	0	255		7	171.578	0.311	0	12		14.762	0.368654		7	171.578	52.487	0	255		52.176	0.947311	0.999751			0.369191	0.369191
		8	171.578	15.491	0	250		8	171.578	0.344	0	33		15.147	0.378268		8	171.578	52.507	0	255		52.163	0.947075	1.00268			0.37882	0.37882
		9	171.578	15.709	0	250		9	171.578	0.329	0	40		15.38	0.384087		9	171.578	52.632	0	255		52.303	0.949617	1.00067			0.384647	0.384647
		10	171.578	15.93	0	255		10	171.578	0.342	0	30		15.588	0.389282		10	171.578	52.68	0	255		52.338	0.950252	0.987848			0.389849	0.389849
		11	171.578	15.821	0	200		11	171.578	0.335	0	27		15.486	0.386734		11	171.578	52.037	0	255		51.702	0.938705	1.0022			0.387298	0.387298
		12	171.578	16.319	0	247		12	171.578	0.333	0	30		15.986	0.399221		12	171.578	52.149	0	255		51.816	0.940775	1.00326			0.399803	0.399803
		13	171.578	15.823	0	218		13	171.578	0.33	0	22		15.493	0.386909		13	171.578	52.315	0	255		51.985	0.943843	1.0039			0.387473	0.387473
		14	171.578	15.773	0	219		14	171.578	0.343	0	34		15.43	0.385336		14	171.578	52.531	0	255		52.188	0.947529	0.991856			0.385897	0.385897
		15	171.578	15.532	0	217		15	171.578	0.325	0	29		15.207	0.379767		15	171.578	52.088	0	255		51.763	0.939813	0.998783			0.38032	0.38032
		16	171.578	16.234	0	219		16	171.578	0.359	0	28		15.875	0.396449		16	171.578	52.059	0	255		51.7	0.938669	0.99795			0.397026	0.397026
		17	171.578	16.901	0	227		17	171.578	0.335	0	38		16.566	0.413705		17	171.578	51.929	0	255		51.594	0.936744	1.00242			0.414308	0.414308
		18	171.578	16.612	0	197		18	171.578	0.32	0	26		16.292	0.406863		18	171.578	52.039	0	255		51.719	0.939014	0.991106			0.407455	0.407455
		19	171.578	16.841	0	171		19	171.578	0.342	0	28		16.499	0.412032		19	171.578	51.601	0	255		51.259	0.930662	0.999278			0.412632	0.412632
		20	171.578	16.786	0	182		20	171.578	0.326	0	35		16.46	0.411058		20	171.578	51.548	0	255		51.222	0.92999	1.00131			0.411657	0.411657
		21	171.578	17.011	0	188		21	171.578	0.325	0	27		16.686	0.416702		21	171.578	51.614	0	255		51.289	0.931207	1.00271			0.417309	0.417309
		22	171.578	16.056	0	183		22	171.578	0.307	0	23		15.749	0.393302		22	171.578	51.735	0	255		51.428	0.93373	0.990686			0.393875	0.393875
		23	171.578	16.072	0	198		23	171.578	0.321	0	29		15.751	0.393352		23	171.578	51.27	0	255		50.949	0.925034	0.995152			0.393925	0.393925
		24	171.578	15.545	0	194		24	171.578	0.309	0	35		15.236	0.380491		24	171.578	51.011	0	255		50.702	0.920549	0.993038			0.381045	0.381045
		25	171.578	15.218	0	205		25	171.578	0.322	0	27		14.896	0.372		25	171.578	50.671	0	255		50.349	0.91414	1.00097			0.372542	0.372542
		26	171.578	15.29	0	182		26	171.578	0.317	0	23		14.973	0.373923		26	171.578	50.715	0	255		50.398	0.91503	0.999663			0.374468	0.374468
		27	171.578	14.268	0	223		27	171.578	0.315	0	35		13.953	0.34845		27	171.578	50.696	0	255		50.381	0.914721	0.998531			0.348958	0.348958
		28	171.578	13.367	0	234		28	171.578	0.306	0	33		13.061	0.326174		28	171.578	50.613	0	255		50.307	0.913377	0.995826			0.32665	0.32665
		29	171.578	13.993	0	220		29	171.578	0.306	0	21		13.687	0.341808		29	171.578	50.403	0	255		50.097	0.909565	1.00074			0.342306	0.342306
		30	171.578	14.153	0	214		30	171.578	0.314	0	24		13.839	0.345603		30	171.578	50.448	0	255		50.134	0.910236	0.986277			0.346107	0.346107
		31	171.578	13.975	0	216		31	171.578	0.298	0	29		13.677	0.341558		31	171.578	49.744	0	255		49.446	0.897745	1.00229			0.342055	0.342055
		32	171.578	12.805	0	252		32	171.578	0.302	0	25		12.503	0.312239		32	171.578	49.861	0	255		49.559	0.899797	1.00052			0.312694	0.312694
		33	171.578	12.275	0	229		33	171.578	0.31	0	34		11.965	0.298804		33	171.578	49.895	0	255		49.585	0.900269	0.989331			0.299239	0.299239
		34	171.578	12.832	0	250		34	171.578	0.314	0	37		12.518	0.312614		34	171.578	49.37	0	255		49.056	0.890664	0.999083			0.313069	0.313069
		35	171.578	13.424	0	253		35	171.578	0.304	0	37		13.12	0.327648		35	171.578	49.315	0	255		49.011	0.889847	0.999327			0.328125	0.328125
		36	171.578	13.747	0	236		36	171.578	0.31	0	43		13.437	0.335564		36	171.578	49.288	0	255		48.978	0.889248	0.996631			0.336053	0.336053
		37	171.578	14.15	0	215		37	171.578	0.311	0	37		13.839	0.345603		37	171.578	49.124	0	255		48.813	0.886252	0.994018			0.346107	0.346107
		38	171.578	14.012	0	218		38	171.578	0.309	0	26		13.703	0.342207		38	171.578	48.83	0	255		48.521	0.880951	0.996393			0.342706	0.342706
		39	171.578	13.697	0	237		39	171.578	0.3	0	36		13.397	0.334565		39	171.578	48.646	0	255		48.346	0.877773	0.996111			0.335053	0.335053
		40	171.578	13.722	0	227		40	171.578	0.301	0	19		13.421	0.335165		40	171.578	48.459	0	255		48.158	0.87436	1.00069			0.335653	0.335653
		41	171.578	13.826	0	237		41	171.578	0.306	0	34		13.52	0.337637		41	171.578	48.497	0	255		48.191	0.874959	0.994667			0.338129	0.338129
		42	171.578	13.759	0	225		42	171.578	0.312	0	21		13.447	0.335814		42	171.578	48.246	0	255		47.934	0.870293	1.00753			0.336303	0.336303
		43	171.578	13.786	0	226		43	171.578	0.309	0	27		13.477	0.336563		43	171.578	48.604	0	255		48.295	0.876847	1.00029			0.337054	0.337054
		44	171.578	14.084	0	226		44	171.578	0.298	0	30		13.786	0.34428		44	171.578	48.607	0	255		48.309	0.877102	1.00793			0.344782	0.344782
		45	171.578	13.492	0	234		45	171.578	0.305	0	28		13.187	0.329321		45	171.578	48.997	0	255		48.692	0.884055	0.989238			0.329801	0.329801
		46	171.578	14.369	0	213		46	171.578	0.292	0	25		14.077	0.351547		46	171.578	48.46	0	255		48.168	0.874542	1.00776			0.352059	0.352059
		47	171.578	14.318	0	214		47	171.578	0.287	0	23		14.031	0.350398		47	171.578	48.829	0	255		48.542	0.881332	0.991224			0.350909	0.350909
		48	171.578	14.115	0	185		48	171.578	0.298	0	11		13.817	0.345054		48	171.578	48.414	0	255		48.116	0.873597	0.99867			0.345557	0.345557
		49	171.578	14.248	0	198		49	171.578	0.274	0	13		13.974	0.348975		49	171.578	48.326	0	255		48.052	0.872435	0.999438			0.349483	0.349483
		50	171.578	14.213	0	202		50	171.578	0.284	0	16		13.929	0.347851		50	171.578	48.309	0	255		48.025	0.871945	1.00058			0.348358	0.348358
		51	171.578	13.918	0	216		51	171.578	0.28	0	18		13.638	0.340584		51	171.578	48.333	0	255		48.053	0.872454	0.999292			0.34108	0.34108
		52	171.578	14.286	0	165		52	171.578	0.284	0	18		14.002	0.349674		52	171.578	48.303	0	255		48.019	0.871836	1.00696			0.350184	0.350184
		53	171.578	14.022	0	207		53	171.578	0.289	0	28		13.733	0.342956		53	171.578	48.642	0	255		48.353	0.8779	1.00871			0.343456	0.343456
		54	171.578	14.787	0	203		54	171.578	0.296	0	31		14.491	0.361886		54	171.578	49.07	0	255		48.774	0.885544	0.995305			0.362413	0.362413
		55	171.578	14.921	0	184		55	171.578	0.316	0	27		14.605	0.364733		55	171.578	48.861	0	255		48.545	0.881386	1.00542			0.365264	0.365264
		56	171.578	14.152	0	243		56	171.578	0.301	0	28		13.851	0.345903		56	171.578	49.109	0	255		48.808	0.886161	1.00459			0.346407	0.346407
		57	171.578	14.017	0	222		57	171.578	0.291	0	30		13.726	0.342782		57	171.578	49.323	0	255		49.032	0.890228	1.00198			0.343281	0.343281
		58	171.578	13.852	0	169		58	171.578	0.298	0	29		13.554	0.338486		58	171.578	49.427	0	255		49.129	0.89199	1.00073			0.338979	0.338979
		59	171.578	14.15	0	203		59	171.578	0.307	0	32		13.843	0.345703		59	171.578	49.472	0	255		49.165	0.892643	0.996441			0.346207	0.346207
		60	171.578	14.201	0	214		60	171.578	0.298	0	29		13.903	0.347202		60	171.578	49.288	0	255		48.99	0.889466	0.997714			0.347708	0.347708
		61	171.578	14.545	0	228		61	171.578	0.272	0	23		14.273	0.356442		61	171.578	49.15	0	255		48.878	0.887432	0.992942			0.356961	0.356961
		62	171.578	14.742	0	199		62	171.578	0.288	0	29		14.454	0.360962		62	171.578	48.821	0	255		48.533	0.881169	1.002			0.361488	0.361488
		63	171.578	15.038	0	169		63	171.578	0.3	0	43		14.738	0.368054		63	171.578	48.93	0	255		48.63	0.88293	1.00039			0.368591	0.368591
		64	171.578	14.872	0	167		64	171.578	0.308	0	33		14.564	0.363709		64	171.578	48.957	0	255		48.649	0.883275	0.997122			0.364239	0.364239
		65	171.578	14.93	0	180		65	171.578	0.279	0	25		14.651	0.365882		65	171.578	48.788	0	255		48.509	0.880733	0.994537			0.366415	0.366415
		66	171.578	13.739	0	222		66	171.578	0.285	0	21		13.454	0.335989		66	171.578	48.529	0	255		48.244	0.875921	0.992787			0.336478	0.336478
		67	171.578	13.563	0	222		67	171.578	0.274	0	17		13.289	0.331868		67	171.578	48.17	0	255		47.896	0.869603	1.0023			0.332352	0.332352
		68	171.578	14.066	0	207		68	171.578	0.275	0	23		13.791	0.344405		68	171.578	48.281	0	255		48.006	0.8716	1.00558			0.344907	0.344907
		69	171.578	14.156	0	243		69	171.578	0.278	0	22		13.878	0.346577		69	171.578	48.552	0	255		48.274	0.876466	0.990678			0.347082	0.347082
		70	171.578	15.15	0	202		70	171.578	0.279	0	26		14.871	0.371376		70	171.578	48.103	0	255		47.824	0.868296	1.00153			0.371917	0.371917
		71	171.578	14.741	0	209		71	171.578	0.252	0	21		14.489	0.361836		71	171.578	48.149	0	255		47.897	0.869621	1.00265			0.362363	0.362363
		72	171.578	14.424	0	223		72	171.578	0.286	0	27		14.138	0.35307		72	171.578	48.31	0	255		48.024	0.871927	0.98734			0.353585	0.353585
		73	171.578	14.297	0	226		73	171.578	0.286	0	32		14.011	0.349899		73	171.578	47.702	0	255		47.416	0.860888	1.00006			0.350409	0.350409
		74	171.578	13.445	0	205		74	171.578	0.27	0	38		13.175	0.329021		74	171.578	47.689	0	255		47.419	0.860943	0.999325			0.329501	0.329501
		75	171.578	13.53	0	212		75	171.578	0.294	0	21		13.236	0.330545		75	171.578	47.681	0	255		47.387	0.860362	0.994555			0.331026	0.331026
		76	171.578	12.96	0	217		76	171.578	0.298	0	31		12.662	0.31621		76	171.578	47.427	0	255		47.129	0.855677	1.00526			0.316671	0.316671
		77	171.578	12.474	0	200		77	171.578	0.283	0	21		12.191	0.304448		77	171.578	47.66	0	255		47.377	0.86018	1.00331			0.304891	0.304891
		78	171.578	11.549	0	227		78	171.578	0.289	0	27		11.26	0.281198		78	171.578	47.823	0	255		47.534	0.863031	0.996529			0.281607	0.281607
		79	171.578	10.813	0	223		79	171.578	0.282	0	32		10.531	0.262992		79	171.578	47.651	0	255		47.369	0.860035	0.99354			0.263375	0.263375
		80	171.578	10.535	0	223		80	171.578	0.296	0	30		10.239	0.2557		80	171.578	47.359	0	255		47.063	0.854479	0.993817			0.256073	0.256073
		81	171.578	10.193	0	240		81	171.578	0.294	0	24		9.899	0.247209		81	171.578	47.066	0	255		46.772	0.849196	1.0078			0.247569	0.247569
		82	171.578	10.685	0	211		82	171.578	0.284	0	33		10.401	0.259746		82	171.578	47.421	0	255		47.137	0.855823	1.01031			0.260124	0.260124
		83	171.578	10.923	0	194		83	171.578	0.288	0	33		10.635	0.265589		83	171.578	47.911	0	255		47.623	0.864647	1.0038			0.265976	0.265976
		84	171.578	11.484	0	241		84	171.578	0.296	0	22		11.188	0.2794		84	171.578	48.1	0	255		47.804	0.867933	1.005			0.279807	0.279807
		85	171.578	11.868	0	194		85	171.578	0.282	0	18		11.586	0.289339		85	171.578	48.325	0	255		48.043	0.872272	0.994338			0.289761	0.289761
		86	171.578	12.134	0	173		86	171.578	0.282	0	27		11.852	0.295982		86	171.578	48.053	0	255		47.771	0.867334	1.00525			0.296413	0.296413
		87	171.578	12.865	0	179		87	171.578	0.289	0	22		12.576	0.314062		87	171.578	48.311	0	255		48.022	0.871891	0.997959			0.31452	0.31452
		88	171.578	13.346	0	136		88	171.578	0.29	0	30		13.056	0.326049		88	171.578	48.214	0	255		47.924	0.870111	1.00376			0.326525	0.326525
		89	171.578	14.117	0	152		89	171.578	0.277	0	20		13.84	0.345628		89	171.578	48.381	0	255		48.104	0.87338	1.00312			0.346132	0.346132
		90	171.578	14.49	0	161		90	171.578	0.278	0	28		14.212	0.354918		90	171.578	48.532	0	255		48.254	0.876103	0.999026			0.355436	0.355436
		91	171.578	13.89	0	142		91	171.578	0.289	0	31		13.601	0.33966		91	171.578	48.496	0	255		48.207	0.87525	1.00784			0.340155	0.340155
		92	171.578	14.131	0	148		92	171.578	0.278	0	26		13.853	0.345953		92	171.578	48.863	0	255		48.585	0.882113	0.993661			0.346457	0.346457
		93	171.578	14.343	0	148		93	171.578	0.274	0	23		14.069	0.351347		93	171.578	48.551	0	255		48.277	0.876521	0.996644			0.351859	0.351859
		94	171.578	15.05	0	143		94	171.578	0.274	0	24		14.776	0.369003		94	171.578	48.389	0	255		48.115	0.873579	0.996675			0.369541	0.369541
		95	171.578	15.629	0	140		95	171.578	0.291	0	20		15.338	0.383038		95	171.578	48.246	0	255		47.955	0.870674	0			0.383596	0.383596
phNpn2TCS_Neuron4_FRAP		Section	Area	Mean	Min	Max		Background	Area	Mean	Min	Max		Adjusted F	%		Control	Area	Mean	Min	Max		Adjusted F	%	change	ave change		corrected F	corrected%
		1	260.563	27.475	0	255		1	260.563	0.468	0	21		27.007	1		1	260.563	34.167	0	182		33.699	1	0.99635	1.00053		1	1
		2	260.563	27.271	0	255		2	260.563	0.446	0	20		26.825	0.993261		2	260.563	34.022	0	149		33.576	0.99635	0.997141			0.992731	0.992731
		3	260.563	27.42	0	255		3	260.563	0.475	0	19		26.945	0.997704		3	260.563	33.955	0	137		33.48	0.993501	1.00275			0.997171	0.997171
		4	260.563	26.998	0	255		4	260.563	0.468	0	20		26.53	0.982338		4	260.563	34.04	0	176		33.572	0.996231	1.007			0.981813	0.981813
		5	260.563	26.957	0	255		5	260.563	0.459	0	24		26.498	0.981153		5	260.563	34.266	0	172		33.807	1.0032	0.999497			0.980629	0.980629
		6	260.563	10.848	0	129		6	260.563	0.429	0	19		10.419	0.385789		6	260.563	34.219	0	159		33.79	1.0027	1.00394			0.385583	0.385583
		7	260.563	11.524	0	166		7	260.563	0.444	0	23		11.08	0.410264		7	260.563	34.367	0	147		33.923	1.00665	1.0015			0.410045	0.410045
		8	260.563	12.047	0	114		8	260.563	0.438	0	26		11.609	0.429852		8	260.563	34.412	0	172		33.974	1.00816	1.00079			0.429622	0.429622
		9	260.563	12.597	0	122		9	260.563	0.446	0	19		12.151	0.44992		9	260.563	34.447	0	152		34.001	1.00896	0.996618			0.44968	0.44968
		10	260.563	13.07	0	255		10	260.563	0.458	0	22		12.612	0.46699		10	260.563	34.344	0	163		33.886	1.00555	0.997403			0.466741	0.466741
		11	260.563	13.305	0	168		11	260.563	0.439	0	17		12.866	0.476395		11	260.563	34.237	0	164		33.798	1.00294	0.995562			0.476141	0.476141
		12	260.563	13.38	0	129		12	260.563	0.453	0	17		12.927	0.478654		12	260.563	34.101	0	151		33.648	0.998487	0.997533			0.478398	0.478398
		13	260.563	13.57	0	136		13	260.563	0.426	0	18		13.144	0.486689		13	260.563	33.991	0	198		33.565	0.996024	0.998421			0.486429	0.486429
		14	260.563	13.763	0	122		14	260.563	0.443	0	15		13.32	0.493205		14	260.563	33.955	0	160		33.512	0.994451	1.00069			0.492942	0.492942
		15	260.563	13.903	0	210		15	260.563	0.438	0	18		13.465	0.498574		15	260.563	33.973	0	163		33.535	0.995133	0.991651			0.498308	0.498308
		16	260.563	14.081	0	177		16	260.563	0.46	0	16		13.621	0.504351		16	260.563	33.715	0	164		33.255	0.986825	0.995971			0.504081	0.504081
		17	260.563	14.292	0	255		17	260.563	0.453	0	22		13.839	0.512423		17	260.563	33.574	0	156		33.121	0.982848	1.00399			0.512149	0.512149
		18	260.563	14.519	0	244		18	260.563	0.443	0	20		14.076	0.521198		18	260.563	33.696	0	167		33.253	0.986765	1.00626			0.52092	0.52092
		19	260.563	14.644	0	230		19	260.563	0.446	0	20		14.198	0.525716		19	260.563	33.907	0	194		33.461	0.992937	0.998117			0.525435	0.525435
		20	260.563	14.718	0	133		20	260.563	0.469	0	19		14.249	0.527604		20	260.563	33.867	0	191		33.398	0.991068	0.998653			0.527322	0.527322
		21	260.563	14.949	0	192		21	260.563	0.463	0	19		14.486	0.536379		21	260.563	33.816	0	199		33.353	0.989733	0.987977			0.536093	0.536093
		22	260.563	15.106	0	243		22	260.563	0.435	0	20		14.671	0.54323		22	260.563	33.387	0	187		32.952	0.977833	0.993475			0.542939	0.542939
		23	260.563	15.07	0	255		23	260.563	0.431	0	26		14.639	0.542045		23	260.563	33.168	0	194		32.737	0.971453	1.00049			0.541755	0.541755
		24	260.563	15.043	0	255		24	260.563	0.43	0	18		14.613	0.541082		24	260.563	33.183	0	162		32.753	0.971928	1.00849			0.540793	0.540793
		25	260.563	15.148	0	255		25	260.563	0.444	0	15		14.704	0.544451		25	260.563	33.475	0	172		33.031	0.980177	1.00248			0.544161	0.544161
		26	260.563	15.202	0	255		26	260.563	0.445	0	27		14.757	0.546414		26	260.563	33.558	0	156		33.113	0.982611	1.00254			0.546122	0.546122
		27	260.563	15.029	0	140		27	260.563	0.436	0	18		14.593	0.540341		27	260.563	33.633	0	187		33.197	0.985103	0.994457			0.540053	0.540053
		28	260.563	15.052	0	255		28	260.563	0.449	0	21		14.603	0.540712		28	260.563	33.462	0	181		33.013	0.979643	1.01075			0.540423	0.540423
		29	260.563	15.235	0	255		29	260.563	0.438	0	17		14.797	0.547895		29	260.563	33.806	0	171		33.368	0.990178	0.994156			0.547602	0.547602
		30	260.563	15.107	0	179		30	260.563	0.436	0	17		14.671	0.54323		30	260.563	33.609	0	184		33.173	0.984391	1.00989			0.542939	0.542939
		31	260.563	15.292	0	228		31	260.563	0.433	0	18		14.859	0.550191		31	260.563	33.934	0	189		33.501	0.994124	0.984418			0.549897	0.549897
		32	260.563	15.468	0	185		32	260.563	0.429	0	14		15.039	0.556856		32	260.563	33.408	0	167		32.979	0.978634	0.997726			0.556558	0.556558
		33	260.563	15.602	0	149		33	260.563	0.453	0	21		15.149	0.560929		33	260.563	33.357	0	180		32.904	0.976409	1.00796			0.560629	0.560629
		34	260.563	15.631	0	205		34	260.563	0.427	0	21		15.204	0.562965		34	260.563	33.593	0	157		33.166	0.984184	0.998523			0.562665	0.562665
		35	260.563	15.883	0	244		35	260.563	0.431	0	16		15.452	0.572148		35	260.563	33.548	0	158		33.117	0.982729	0.991545			0.571842	0.571842
		36	260.563	15.823	0	255		36	260.563	0.413	0	20		15.41	0.570593		36	260.563	33.25	0	184		32.837	0.974421	1.00643			0.570288	0.570288
		37	260.563	15.852	0	255		37	260.563	0.416	0	17		15.436	0.571556		37	260.563	33.464	0	191		33.048	0.980682	0.999274			0.57125	0.57125
		38	260.563	15.864	0	255		38	260.563	0.427	0	20		15.437	0.571593		38	260.563	33.451	0	171		33.024	0.97997	1.00597			0.571287	0.571287
		39	260.563	15.798	0	233		39	260.563	0.407	0	21		15.391	0.569889		39	260.563	33.628	0	166		33.221	0.985816	0.994913			0.569585	0.569585
		40	260.563	16.024	0	213		40	260.563	0.428	0	20		15.596	0.57748		40	260.563	33.48	0	164		33.052	0.980801	0.997822			0.577172	0.577172
		41	260.563	15.898	0	158		41	260.563	0.419	0	23		15.479	0.573148		41	260.563	33.399	0	172		32.98	0.978664	0.999576			0.572842	0.572842
		42	260.563	15.803	0	175		42	260.563	0.404	0	18		15.399	0.570186		42	260.563	33.37	0	162		32.966	0.978249	0.997088			0.569881	0.569881
		43	260.563	15.658	0	160		43	260.563	0.403	0	19		15.255	0.564854		43	260.563	33.273	0	179		32.87	0.9754	0.998296			0.564552	0.564552
		44	260.563	15.725	0	227		44	260.563	0.409	0	15		15.316	0.567112		44	260.563	33.223	0	183		32.814	0.973738	0.997288			0.566809	0.566809
		45	260.563	15.809	0	176		45	260.563	0.445	0	20		15.364	0.56889		45	260.563	33.17	0	146		32.725	0.971097	1.00223			0.568586	0.568586
		46	260.563	15.896	0	143		46	260.563	0.407	0	17		15.489	0.573518		46	260.563	33.205	0	168		32.798	0.973263	0.994786			0.573212	0.573212
		47	260.563	16.13	0	252		47	260.563	0.4	0	19		15.73	0.582442		47	260.563	33.027	0	160		32.627	0.968189	0.999877			0.582131	0.582131
		48	260.563	16.267	0	211		48	260.563	0.415	0	17		15.852	0.586959		48	260.563	33.038	0	178		32.623	0.96807	1.00481			0.586645	0.586645
		49	260.563	16.113	0	255		49	260.563	0.4	0	17		15.713	0.581812		49	260.563	33.18	0	180		32.78	0.972729	1.00076			0.581501	0.581501
		50	260.563	16.18	0	255		50	260.563	0.388	0	16		15.792	0.584737		50	260.563	33.193	0	160		32.805	0.973471	1.01067			0.584425	0.584425
		51	260.563	16.284	0	169		51	260.563	0.41	0	15		15.874	0.587774		51	260.563	33.565	0	193		33.155	0.983857	1.00051			0.58746	0.58746
		52	260.563	16.059	0	200		52	260.563	0.404	0	17		15.655	0.579665		52	260.563	33.576	0	186		33.172	0.984362	1.00374			0.579355	0.579355
		53	260.563	16.206	0	193		53	260.563	0.392	0	15		15.814	0.585552		53	260.563	33.688	0	202		33.296	0.988041	1.00243			0.585239	0.585239
		54	260.563	16.381	0	195		54	260.563	0.392	0	19		15.989	0.592032		54	260.563	33.769	0	200		33.377	0.990445	1.01082			0.591716	0.591716
		55	260.563	16.534	0	214		55	260.563	0.383	0	19		16.151	0.59803		55	260.563	34.121	0	178		33.738	1.00116	0.998251			0.597711	0.597711
		56	260.563	16.367	0	231		56	260.563	0.38	0	21		15.987	0.591958		56	260.563	34.059	0	174		33.679	0.999407	0.992844			0.591642	0.591642
		57	260.563	16.377	0	195		57	260.563	0.412	0	23		15.965	0.591143		57	260.563	33.85	0	190		33.438	0.992255	0.987978			0.590827	0.590827
		58	260.563	16.36	0	212		58	260.563	0.366	0	17		15.994	0.592217		58	260.563	33.402	0	207		33.036	0.980326	1.0158			0.591901	0.591901
		59	260.563	16.483	0	174		59	260.563	0.41	0	17		16.073	0.595142		59	260.563	33.968	0	181		33.558	0.995816	1.00155			0.594824	0.594824
		60	260.563	16.352	0	151		60	260.563	0.389	0	18		15.963	0.591069		60	260.563	33.999	0	174		33.61	0.997359	1.00405			0.590753	0.590753
		61	260.563	16.368	0	166		61	260.563	0.387	0	17		15.981	0.591735		61	260.563	34.133	0	179		33.746	1.00139	1.00581			0.591419	0.591419
		62	260.563	16.342	0	187		62	260.563	0.382	0	15		15.96	0.590958		62	260.563	34.324	0	177		33.942	1.00721	0.993548			0.590642	0.590642
		63	260.563	16.441	0	152		63	260.563	0.394	0	19		16.047	0.594179		63	260.563	34.117	0	164		33.723	1.00071	1.00448			0.593862	0.593862
		64	260.563	16.459	0	171		64	260.563	0.411	0	19		16.048	0.594216		64	260.563	34.285	0	153		33.874	1.00519	1.01142			0.593899	0.593899
		65	260.563	16.171	0	154		65	260.563	0.388	0	19		15.783	0.584404		65	260.563	34.649	0	172		34.261	1.01668	0.996702			0.584092	0.584092
		66	260.563	16.196	0	138		66	260.563	0.392	0	18		15.804	0.585182		66	260.563	34.54	0	190		34.148	1.01332	1.00056			0.584869	0.584869
		67	260.563	16.326	0	174		67	260.563	0.399	0	20		15.927	0.589736		67	260.563	34.566	0	172		34.167	1.01389	1.00129			0.589421	0.589421
		68	260.563	16.374	0	161		68	260.563	0.39	0	21		15.984	0.591847		68	260.563	34.601	0	162		34.211	1.01519	1.00626			0.59153	0.59153
		69	260.563	16.172	0	222		69	260.563	0.396	0	25		15.776	0.584145		69	260.563	34.821	0	153		34.425	1.02154	1.00171			0.583833	0.583833
		70	260.563	16.199	0	233		70	260.563	0.383	0	16		15.816	0.585626		70	260.563	34.867	0	184		34.484	1.02329	1.002			0.585313	0.585313
		71	260.563	16.258	0	255		71	260.563	0.393	0	17		15.865	0.58744		71	260.563	34.946	0	176		34.553	1.02534	1.00365			0.587127	0.587127
		72	260.563	16.413	0	238		72	260.563	0.399	0	20		16.014	0.592957		72	260.563	35.078	0	194		34.679	1.02908	0.993512			0.592641	0.592641
		73	260.563	16.088	0	178		73	260.563	0.423	0	20		15.665	0.580035		73	260.563	34.877	0	171		34.454	1.0224	1.00403			0.579725	0.579725
		74	260.563	16.052	0	172		74	260.563	0.384	0	20		15.668	0.580146		74	260.563	34.977	0	169		34.593	1.02653	0.999595			0.579836	0.579836
		75	260.563	16.169	0	170		75	260.563	0.402	0	21		15.767	0.583812		75	260.563	34.981	0	143		34.579	1.02611	0.999393			0.5835	0.5835
		76	260.563	16.14	0	247		76	260.563	0.405	0	18		15.735	0.582627		76	260.563	34.963	0	157		34.558	1.02549	1.00859			0.582316	0.582316
		77	260.563	16.135	0	253		77	260.563	0.383	0	22		15.752	0.583256		77	260.563	35.238	0	188		34.855	1.0343	1.00869			0.582945	0.582945
		78	260.563	16.065	0	228		78	260.563	0.392	0	20		15.673	0.580331		78	260.563	35.55	0	154		35.158	1.0433	0.99232			0.580021	0.580021
		79	260.563	16.148	0	255		79	260.563	0.407	0	16		15.741	0.582849		79	260.563	35.295	0	152		34.888	1.03528	1.00811			0.582538	0.582538
		80	260.563	16.172	0	255		80	260.563	0.372	0	16		15.8	0.585034		80	260.563	35.543	0	164		35.171	1.04368	0.988655			0.584721	0.584721
		81	260.563	16.123	0	255		81	260.563	0.385	0	18		15.738	0.582738		81	260.563	35.157	0	167		34.772	1.03184	1.01286			0.582427	0.582427
		82	260.563	16.181	0	201		82	260.563	0.381	0	18		15.8	0.585034		82	260.563	35.6	0	177		35.219	1.04511	1.00681			0.584721	0.584721
		83	260.563	16.201	0	247		83	260.563	0.4	0	17		15.801	0.585071		83	260.563	35.859	0	205		35.459	1.05223	1.00226			0.584758	0.584758
		84	260.563	16.169	0	228		84	260.563	0.392	0	16		15.777	0.584182		84	260.563	35.931	0	223		35.539	1.0546	1.00273			0.58387	0.58387
		85	260.563	16.018	0	191		85	260.563	0.381	0	15		15.637	0.578998		85	260.563	36.017	0	207		35.636	1.05748	0.993434			0.578689	0.578689
		86	260.563	16.038	0	187		86	260.563	0.397	0	15		15.641	0.579146		86	260.563	35.799	0	196		35.402	1.05054	0.984718			0.578837	0.578837
		87	260.563	15.996	0	190		87	260.563	0.397	0	20		15.599	0.577591		87	260.563	35.258	0	192		34.861	1.03448	1.01136			0.577283	0.577283
		88	260.563	15.89	0	204		88	260.563	0.4	0	19		15.49	0.573555		88	260.563	35.657	0	187		35.257	1.04623	0.993675			0.573249	0.573249
		89	260.563	16.016	0	196		89	260.563	0.39	0	20		15.626	0.578591		89	260.563	35.424	0	152		35.034	1.03962	1.0048			0.578282	0.578282
		90	260.563	16.145	0	171		90	260.563	0.387	0	16		15.758	0.583478		90	260.563	35.589	0	170		35.202	1.0446	0.995597			0.583167	0.583167
		91	260.563	16.117	0	162		91	260.563	0.386	0	16		15.731	0.582479		91	260.563	35.433	0	171		35.047	1.04	1.00562			0.582168	0.582168
		92	260.563	15.949	0	170		92	260.563	0.407	0	22		15.542	0.57548		92	260.563	35.651	0	190		35.244	1.04585	1.00026			0.575173	0.575173
		93	260.563	16.035	0	139		93	260.563	0.398	0	30		15.637	0.578998		93	260.563	35.651	0	181		35.253	1.04611	0.995178			0.578689	0.578689
		94	260.563	15.934	0	151		94	260.563	0.379	0	16		15.555	0.575962		94	260.563	35.462	0	178		35.083	1.04107	1.00815			0.575654	0.575654
		95	260.563	15.903	0	166		95	260.563	0.393	0	16		15.51	0.574296		95	260.563	35.762	0	180		35.369	1.04956	0			0.573989	0.573989

## Sheet: wt 11-6-15
phNpn2wt_Neuron1_FRAP	Time	Section	Area	Mean	Min	Max		Background	Area	Mean	Min	Max		Adjusted F	%		Control	Area	Mean	Min	Max		Adjusted F	%	change	ave change		corrected %
	0	1	629.804	356.04	32	25594		1	65.561	121.761	33	1641		234.279	1		1	618.249	391.45	33	43469		269.689	1	0.986158	0.990543		1
	0.5	2	629.804	352.604	30	22759		2	65.561	120.316	34	1390		232.288	0.991502		2	618.249	386.272	33	42042		265.956	0.986158	0.990893			1.00097
	1	3	629.804	351.218	34	23868		3	65.561	126.751	36	1405		224.467	0.958118		3	618.249	390.285	33	37218		263.534	0.977177	1.02118			0.967266
	1.5	4	629.804	351.666	32	26252		4	65.561	118.564	34	1512		233.102	0.994976		4	618.249	387.68	35	44629		269.116	0.997875	1.01473			1.00448
	2	5	629.804	351.411	36	29835		5	65.561	122.863	35	1667		228.548	0.975538		5	618.249	395.943	32	47023		273.08	1.01257	0.982708			0.984852
Bleach	2.5	6	629.804	180.562	35	3759		6	65.561	120.738	37	1359		59.824	0.255354		6	618.249	389.096	37	37901		268.358	0.995065	0.984718			0.257792
	3	7	629.804	189.223	36	4952		7	65.561	121.707	35	1837		67.516	0.288186		7	618.249	385.964	37	36136		264.257	0.979858	1.01828			0.290938
	3.5	8	629.804	201.597	38	4967		8	65.561	120.731	40	1441		80.866	0.34517		8	618.249	389.819	38	37466		269.088	0.997772	0.996641			0.348465
	4	9	629.804	211.855	33	6948		9	65.561	123.404	39	1333		88.451	0.377546		9	618.249	391.588	35	40569		268.184	0.994419	0.978448			0.38115
	4.5	10	629.804	213.601	34	4504		10	65.561	125.429	34	1677		88.172	0.376355		10	618.249	387.833	37	41484		262.404	0.972987	1.0013			0.379948
	5	11	629.804	213.516	35	8797		11	65.561	122.727	39	1571		90.789	0.387525		11	618.249	385.471	37	38858		262.744	0.974248	0.985282			0.391225
	5.5	12	629.804	221.887	34	5914		12	65.561	126.934	38	1463		94.953	0.405299		12	618.249	385.811	36	36971		258.877	0.959909	0.984228			0.409169
	6	13	629.804	225.605	36	6535		13	65.561	124.96	38	2419		100.645	0.429595		13	618.249	379.754	37	33123		254.794	0.94477	0.999925			0.433696
	6.5	14	629.804	225.47	37	6261		14	65.561	119.32	36	1476		106.15	0.453092		14	618.249	374.095	37	32649		254.775	0.944699	0.986007			0.457418
	7	15	629.804	229.688	34	7945		15	65.561	124.308	39	1634		105.38	0.449806		15	618.249	375.518	38	38165		251.21	0.93148	1.00279			0.4541
	7.5	16	629.804	232.202	36	8685		16	65.561	122.889	38	1404		109.313	0.466593		16	618.249	374.8	35	31535		251.911	0.93408	0.953912			0.471048
	8	17	629.804	237.055	36	8719		17	65.561	127.989	40	1800		109.066	0.465539		17	618.249	368.29	39	32824		240.301	0.89103	1.0169			0.469984
	8.5	18	629.804	239.595	38	8983		18	65.561	121.226	39	1317		118.369	0.505248		18	618.249	365.587	37	28275		244.361	0.906084	1.00007			0.510072
	9	19	629.804	237.652	37	9634		19	65.561	122.798	38	1441		114.854	0.490245		19	618.249	367.175	39	25475		244.377	0.906144	0.977854			0.494925
	9.5	20	629.804	240.685	37	10071		20	65.561	126.21	41	1490		114.475	0.488627		20	618.249	365.175	38	27531		238.965	0.886076	0.994706			0.493292
	10	21	629.804	240.003	37	11300		21	65.561	123.105	36	1629		116.898	0.498969		21	618.249	360.805	36	23538		237.7	0.881386	0.997682			0.503733
	10.5	22	629.804	238.283	36	10799		22	65.561	114.671	38	1410		123.612	0.527627		22	618.249	351.82	34	20285		237.149	0.879343	0.946156			0.532665
	11	23	629.804	242.943	38	10644		23	65.561	128.277	40	2090		114.666	0.489442		23	618.249	352.657	38	19390		224.38	0.831995	1.0338			0.494115
	11.5	24	629.804	243.709	39	6913		24	65.561	116.479	34	1537		127.23	0.54307		24	618.249	348.444	36	18822		231.965	0.86012	0.998526			0.548256
	12	25	629.804	244.307	37	12931		25	65.561	116.661	40	2812		127.646	0.544846		25	618.249	348.284	34	20783		231.623	0.858852	0.966113			0.550048
	12.5	26	629.804	206.504	38.3	5150.43		26	65.561	123.688	40	1554		82.8156	0.353491		26	618.249	347.462	34	17617		223.774	0.829748	1.01062			0.356866
	13	27	629.804	203.089	38.5169	4661.79		27	65.561	119.299	38	1655		83.7899	0.35765		27	618.249	345.449	38	14883		226.15	0.838558	0.970665			0.361065
	13.5	28	629.804	199.674	38.7338	4173.15		28	65.561	120.078	37	1214		79.5962	0.339749		28	618.249	339.594	38	19357		219.516	0.81396	1.00789			0.342993
	14	29	629.804	196.259	38.9508	3684.51		29	65.561	119.622	39	1241		76.6374	0.32712		29	618.249	340.87	37	15662		221.248	0.820382	0.970264			0.330244
	14.5	30	629.804	192.845	39.1677	3195.87		30	65.561	118.41	37	1454		74.4347	0.317718		30	618.249	333.079	37	14210		214.669	0.795987	0.958424			0.320752
	15	31	629.804	189.43	39.3846	2707.23		31	65.561	120.843	39	2022		68.587	0.292758		31	618.249	326.587	35	18082		205.744	0.762894	0.964641			0.295553
	15.5	32	629.804	186.015	39.6015	2218.59		32	65.561	125.997	39	1858		60.0182	0.256183		32	618.249	324.466	36	17885		198.469	0.735918	1.0186			0.258629
	16	33	629.804	182.601	39.8185	1729.94		33	65.561	120.932	38	1548		61.6685	0.263227		33	618.249	323.092	33	22861		202.16	0.749604	0.981841			0.26574
	16.5	34	629.804	179.186	40.0354	1241.3		34	65.561	124.348	38	1684		54.8378	0.23407		34	618.249	322.837	38	16529		198.489	0.735992	0.987873			0.236305
	17	35	629.804	175.771	40.2523	752.663		35	65.561	119.607	37	1830		56.1641	0.239731		35	618.249	315.689	34	18323		196.082	0.727067	0.979172			0.24202
	17.5	36	629.804	172.356	40.4692	264.022		36	65.561	116.22	35	2319		56.1363	0.239613		36	618.249	308.218	33	17625		191.998	0.711924	0			0.241901
phNpn2wt_Neuron2_FRAP	Time	Section	Area	Mean	Min	Max		Background	Area	Mean	Min	Max		Adjusted F	%		Control	Area	Mean	Min	Max		Adjusted F	%	change	ave change		corrected %
		1	223.537	514.851	50	26847		1	223.537	145.324	48	2454		369.527	1		1	223.537	407.365	47	7796		262.041	1	0.964383	0.954624		1
		2	223.537	513.393	50	32519		2	223.537	145.129	46	1817		368.264	0.996582		2	223.537	397.837	46	8432		252.708	0.964383	0.995825			1.04395
		3	223.537	502.04	48	25193		3	223.537	145.865	41	2445		356.175	0.963867		3	223.537	397.518	46	8399		251.653	0.960357	0.966474			1.00968
		4	223.537	487.189	50	26501		4	223.537	146.574	43	1868		340.615	0.921759		4	223.537	389.79	44	9314		243.216	0.92816	0.963481			0.965574
		5	223.537	481.956	47	19289		5	223.537	147.481	49	4287		334.475	0.905144		5	223.537	381.815	48	8166		234.334	0.894265	0.906185			0.948168
		6	223.537	262.711	50	4323		6	223.537	148.263	48	2448		114.448	0.309715		6	223.537	360.613	46	8779		212.35	0.810369	1.01276			0.324437
		7	223.537	271.394	46	5086		7	223.537	145.736	45	1986		125.658	0.340051		7	223.537	360.795	46	10758		215.059	0.820707	1.05961			0.356215
		8	223.537	290.421	47	5654		8	223.537	147.27	46	1845		143.151	0.38739		8	223.537	375.149	45	12025		227.879	0.869631	0.895436			0.405804
		9	223.537	299.406	48	4856		9	223.537	149.507	45	2322		149.899	0.405651		9	223.537	353.558	45	8442		204.051	0.778699	0.957746			0.424933
		10	223.537	312.136	51	5239		10	223.537	152.123	48	1618		160.013	0.433021		10	223.537	347.552	48	9993		195.429	0.745796	0.942496			0.453604
		11	223.537	305.911	46	5039		11	223.537	151.038	47	1733		154.873	0.419111		11	223.537	335.229	45	9729		184.191	0.702909	0.95098			0.439033
		12	223.537	305.306	50	6583		12	223.537	151.231	48	1570		154.075	0.416952		12	223.537	326.393	44	8414		175.162	0.668453	0.936499			0.436771
		13	223.537	310.028	48	8352		13	223.537	154.056	47	2415		155.972	0.422086		13	223.537	318.095	48	8147		164.039	0.626005	0.997641			0.442149
		14	223.537	314.205	49	5850		14	223.537	153.939	47	2433		160.266	0.433706		14	223.537	317.591	50	9421		163.652	0.624528	0.906362			0.454321
		15	223.537	307.877	49	5514		15	223.537	156.697	48	4291		151.18	0.409118		15	223.537	305.025	47	8237		148.328	0.566049	0.961477			0.428564
		16	223.537	303.136	50	4824		16	223.537	157.649	43	2049		145.487	0.393711		16	223.537	300.263	49	9019		142.614	0.544243	0.960425			0.412426
		17	223.537	296.113	46	4747		17	223.537	156.887	45	1975		139.226	0.376768		17	223.537	293.857	48	8570		136.97	0.522704	1.015			0.394677
		18	223.537	301.334	53	6366		18	223.537	158.34	49	2695		142.994	0.386965		18	223.537	297.364	49	7308		139.024	0.530543	0.925042			0.405359
		19	223.537	297.387	47	4865		19	223.537	160.984	46	2647		136.403	0.369129		19	223.537	289.587	49	6624		128.603	0.490774	0.988072			0.386675
		20	223.537	296.923	49	5678		20	223.537	163.472	50	8301		133.451	0.36114		20	223.537	290.541	49	6318		127.069	0.48492	0.950066			0.378306
		21	223.537	297.296	48	5601		21	223.537	159.614	51	2344		137.682	0.37259		21	223.537	280.338	49	5776		120.724	0.460707	0.924804			0.3903
		22	223.537	294.455	47	6435		22	223.537	163.144	48	2284		131.311	0.355349		22	223.537	274.79	50	6976		111.646	0.426063	0.893162			0.37224
		23	223.537	295.921	51	6656		23	223.537	167.785	47	2042		128.136	0.346757		23	223.537	267.503	50	6276		99.718	0.380544	0.966345			0.363239
		24	223.537	288.503	48	7152		24	223.537	164.929	46	2156		123.574	0.334411		24	223.537	261.291	45	5250		96.362	0.367736	0.925251			0.350307
		25	223.537	287.022	49	5823		25	223.537	167.371	47	2023		119.651	0.323795		25	223.537	256.53	46	4522		89.159	0.340248	0.940982			0.339186
		26	223.537	280.44	48	4426		26	223.537	167.864	49	3300		112.576	0.304649		26	223.537	251.761	46	4549		83.897	0.320167	1.048			0.31913
		27	223.537	280.984	46	6741		27	223.537	169.873	49	1796		111.111	0.300684		27	223.537	257.797	46	3974		87.924	0.335535	0.930292			0.314977
		28	223.537	277.14	49	7375		28	223.537	166.138	49	2818		111.002	0.300389		28	223.537	247.933	47	5559		81.795	0.312146	0.921462			0.314668
		29	223.537	279.29	46	6277		29	223.537	165.304	46	2049		113.986	0.308465		29	223.537	240.675	46	4053		75.371	0.287631	0.973664			0.323127
		30	223.537	275.52	50	5156		30	223.537	170.544	48	2150		104.976	0.284082		30	223.537	243.93	46	3726		73.386	0.280055	0.920802			0.297585
		31	223.537	274.128	47	6034		31	223.537	171.679	47	1824		102.449	0.277244		31	223.537	239.253	44	3650		67.574	0.257876	0.82033			0.290422
		32	223.537	272.604	44	6754		32	223.537	176.696	44	2509		95.908	0.259543		32	223.537	232.129	47	4171		55.433	0.211543	1.07259			0.27188
		33	223.537	274.935	48	10067		33	223.537	173.929	49	2114		101.006	0.273339		33	223.537	233.386	44	4321		59.457	0.2269	0.916982			0.286331
		34	223.537	271.034	45	4926		34	223.537	176.591	49	2090		94.443	0.255578		34	223.537	231.112	49	3779		54.521	0.208063	0.942536			0.267727
		35	223.537	279.564	50	4990		35	223.537	177.746	50	2474		101.818	0.275536		35	223.537	229.134	48	3877		51.388	0.196107	0.958667			0.288633
		36	223.537	270.281	48	5069		36	223.537	175.854	50	4798		94.427	0.255535		36	223.537	225.118	47	4023		49.264	0.188001	0			0.267681
phNpn2wt_Neuron3_FRAP	Time	Section	Area	Mean	Min	Max		Background	Area	Mean	Min	Max		Adjusted F	%		Control	Area	Mean	Min	Max		Adjusted F	%	change	ave change		corrected %
		1	185.723	562.434	58	39829		1	185.723	130.196	51	2484		432.238	1		1	185.723	605.417	57	13171		475.221	1	0.982837	0.995935		1
		2	185.723	547.092	54	42191		2	185.723	128.427	55	3288		418.665	0.968598		2	185.723	595.492	53	12875		467.065	0.982837	0.996386			0.972551
		3	185.723	539.402	54	41792		3	185.723	130.984	53	3070		408.418	0.944891		3	185.723	596.361	57	13393		465.377	0.979285	1.00606			0.948748
		4	185.723	541.6	51	37418		4	185.723	130.622	55	2619		410.978	0.950814		4	185.723	598.818	50	14532		468.196	0.985217	1.00045			0.954695
		5	185.723	540.148	54	43379		5	185.723	126.756	49	2344		413.392	0.956399		5	185.723	595.162	55	13723		468.406	0.985659	1.00105			0.960302
		6	185.723	200.522	51	4984		6	185.723	128.655	50	2221		71.867	0.166267		6	185.723	597.555	50	15767		468.9	0.986699	0.958748			0.166946
		7	185.723	214.83	54	5926		7	185.723	127.953	50	2445		86.877	0.200993		7	185.723	577.51	59	15606		449.557	0.945996	1.03466			0.201814
		8	185.723	222.049	56	5150		8	185.723	131.716	51	3630		90.333	0.208989		8	185.723	596.853	56	12374		465.137	0.97878	0.991086			0.209842
		9	185.723	233.703	52	7024		9	185.723	129.772	55	2678		103.931	0.240449		9	185.723	590.763	57	12643		460.991	0.970056	0.994757			0.24143
		10	185.723	239.981	53	6870		10	185.723	126.168	50	2850		113.813	0.263311		10	185.723	584.742	54	10852		458.574	0.96497	0.980459			0.264386
		11	185.723	244.733	55	6072		11	185.723	129.827	55	1978		114.906	0.26584		11	185.723	579.44	56	13478		449.613	0.946113	1.00738			0.266925
		12	185.723	249.819	52	5220		12	185.723	129.654	57	2695		120.165	0.278007		12	185.723	582.585	56	11262		452.931	0.953096	0.981024			0.279141
		13	185.723	243.585	57	6623		13	185.723	129.704	57	1880		113.881	0.263468		13	185.723	574.04	57	11224		444.336	0.935009	1.00664			0.264544
		14	185.723	249.569	54	9133		14	185.723	128.493	48	1907		121.076	0.280114		14	185.723	575.778	55	12048		447.285	0.941215	1.00639			0.281257
		15	185.723	252.305	56	7681		15	185.723	128.494	56	2229		123.811	0.286442		15	185.723	578.635	58	10654		450.141	0.947225	0.970707			0.287611
		16	185.723	262.256	54	11986		16	185.723	128.48	56	2889		133.776	0.309496		16	185.723	565.435	57	11507		436.955	0.919477	1.03234			0.310759
		17	185.723	264.123	56	11566		17	185.723	130.031	56	2473		134.092	0.310227		17	185.723	581.117	60	11659		451.086	0.949213	1.00501			0.311493
		18	185.723	250.419	54	5966		18	185.723	126.308	53	1943		124.111	0.287136		18	185.723	579.655	53	14595		453.347	0.953971	0.978862			0.288308
		19	185.723	259.417	56	7471		19	185.723	127.169	50	2141		132.248	0.305961		19	185.723	570.933	56	13059		443.764	0.933806	1.00018			0.30721
		20	185.723	265.566	54	8597		20	185.723	131.757	55	3285		133.809	0.309573		20	185.723	575.599	55	12790		443.842	0.93397	0.972454			0.310836
		21	185.723	259.438	54	9309		21	185.723	126.564	54	2280		132.874	0.307409		21	185.723	558.18	52	14096		431.616	0.908243	1.03292			0.308664
		22	185.723	263.806	58	6570		22	185.723	130.133	54	1827		133.673	0.309258		22	185.723	575.959	58	17578		445.826	0.938145	0.961947			0.31052
		23	185.723	265.91	54	7299		23	185.723	130.429	52	2081		135.481	0.313441		23	185.723	559.29	57	9465		428.861	0.902445	1.01879			0.31472
		24	185.723	267.327	53	6558		24	185.723	133.538	53	2507		133.789	0.309526		24	185.723	570.457	56	12876		436.919	0.919402	1.00499			0.310789
		25	185.723	276.414	56	6830		25	185.723	132.512	55	2639		143.902	0.332923		25	185.723	571.612	57	12373		439.1	0.923991	0.975878			0.334282
		26	185.723	284.113	57	8446		26	185.723	134.141	53	3369		149.972	0.346966		26	185.723	562.649	55	14240		428.508	0.901703	1.00489			0.348382
		27	185.723	273.421	52	8677		27	185.723	131.53	51	2189		141.891	0.328271		27	185.723	562.135	55	11681		430.605	0.906115	1.02014			0.32961
		28	185.723	278.7	56	7162		28	185.723	130.82	53	4509		147.88	0.342126		28	185.723	570.098	52	14763		439.278	0.924366	1.03201			0.343523
		29	185.723	287.322	54	8245		29	185.723	129.761	52	2863		157.561	0.364524		29	185.723	583.1	58	11897		453.339	0.953954	0.971743			0.366011
		30	185.723	273.581	53	9441		30	185.723	130.97	56	2707		142.611	0.329936		30	185.723	571.499	57	12664		440.529	0.926998	1.00161			0.331283
		31	185.723	273.832	51	8582		31	185.723	132.066	52	2062		141.766	0.327981		31	185.723	573.306	53	11423		441.24	0.928494	0.970374			0.32932
		32	185.723	270.302	55	11366		32	185.723	132.729	57	1955		137.573	0.318281		32	185.723	560.897	57	10450		428.168	0.900987	1.00227			0.31958
		33	185.723	273.36	52	7170		33	185.723	131.514	55	2174		141.846	0.328166		33	185.723	560.654	55	10975		429.14	0.903032	0.981794			0.329506
		34	185.723	268.305	55	6783		34	185.723	130.108	54	2521		138.197	0.319724		34	185.723	551.435	57	13443		421.327	0.886592	0.975			0.321029
		35	185.723	267.872	55	6079		35	185.723	131.087	53	2768		136.785	0.316458		35	185.723	541.881	56	10706		410.794	0.864427	0.995905			0.317749
		36	185.723	275.074	54	7059		36	185.723	131.475	55	2235		143.599	0.332222		36	185.723	540.587	56	11384		409.112	0.860888	0			0.333578
phNpn2wt_Neuron4_FRAP	Time	Section	Area	Mean	Min	Max		Background	Area	Mean	Min	Max		Adjusted F	%		Control	Area	Mean	Min	Max		Adjusted F	%	change	ave change		corrected %
		1	123.524	2111.77	61	53536		1	123.524	106.862	60	1570		2004.9	1		1	123.524	2545.93	58	31315		2439.06	1	0.987724	0.998212		1
		2	123.524	2073.6	63	56160		2	123.524	108.656	59	2115		1964.95	0.980069		2	123.524	2517.78	62	38247		2409.12	0.987724	1.01347			0.981825
		3	123.524	2084.88	61	51305		3	123.524	103.878	57	1339		1981	0.988076		3	123.524	2545.45	60	30397		2441.57	1.00103	0.989682			0.989845
		4	123.524	2068.16	62	45397		4	123.524	102.706	56	1625		1965.45	0.980323		4	123.524	2519.08	61	37889		2416.38	0.990699	1.00149			0.982078
		5	123.524	2054.22	60	50465		5	123.524	103.762	58	1556		1950.46	0.972845		5	123.524	2523.73	60	32961		2419.97	0.992173	1.00914			0.974587
		6	123.524	664.857	62	14494		6	123.524	102.144	56	1396		562.713	0.280668		6	123.524	2544.24	61	35315		2442.1	1.00124	0.99267			0.281171
		7	123.524	741.113	62	13973		7	123.524	104.227	57	1796		636.886	0.317664		7	123.524	2528.42	65	32869		2424.2	0.993905	0.996127			0.318233
		8	123.524	798.131	62	12908		8	123.524	102.238	55	1767		695.893	0.347095		8	123.524	2517.05	64	36174		2414.81	0.990056	0.996263			0.347717
		9	123.524	837.661	57	13149		9	123.524	102.099	55	1369		735.562	0.366881		9	123.524	2507.88	59	32148		2405.78	0.986356	1.00119			0.367538
		10	123.524	844.438	60	12310		10	123.524	103.894	58	1898		740.544	0.369366		10	123.524	2512.54	61	31031		2408.65	0.987529	1.00166			0.370028
		11	123.524	870.565	61	12453		11	123.524	104.655	57	2546		765.91	0.382018		11	123.524	2517.3	62	30724		2412.64	0.989168	0.993302			0.382702
		12	123.524	876.811	63	12294		12	123.524	101.806	57	1803		775.005	0.386554		12	123.524	2498.29	59	27524		2396.49	0.982543	1.00792			0.387247
		13	123.524	900.505	56	14976		13	123.524	98.701	50	1456		801.804	0.399921		13	123.524	2514.17	58	33542		2415.47	0.990328	0.985323			0.400637
		14	123.524	935.08	51	12391		14	123.524	104.037	55	1480		831.043	0.414505		14	123.524	2484.06	59	33020		2380.02	0.975792	0.990868			0.415247
		15	123.524	945.138	63	15217		15	123.524	103.836	57	1447		841.302	0.419622		15	123.524	2462.12	63	34434		2358.29	0.966882	1.01057			0.420373
		16	123.524	959.68	64	13604		16	123.524	107.158	56	1564		852.522	0.425218		16	123.524	2490.38	63	32454		2383.22	0.977106	0.990795			0.42598
		17	123.524	963.053	57	16580		17	123.524	104.796	55	1515		858.257	0.428079		17	123.524	2466.08	62	32948		2361.29	0.968112	0.989068			0.428845
		18	123.524	987.569	58	14841		18	123.524	108.327	58	1384		879.242	0.438545		18	123.524	2443.8	62	30462		2335.47	0.957528	1.01265			0.439331
		19	123.524	981.078	61	16275		19	123.524	106.895	58	1470		874.183	0.436022		19	123.524	2471.91	61	31262		2365.02	0.969643	1.00259			0.436803
		20	123.524	985.359	63	18487		20	123.524	106.526	58	1513		878.833	0.438341		20	123.524	2477.66	58	31385		2371.14	0.97215	0.997269			0.439127
		21	123.524	994.66	57	19122		21	123.524	110.85	60	1337		883.81	0.440824		21	123.524	2475.51	63	33712		2364.66	0.969495	0.999752			0.441613
		22	123.524	1000.86	62	16802		22	123.524	109.852	59	1630		891.01	0.444415		22	123.524	2473.92	62	35097		2364.07	0.969254	0.995415			0.445211
		23	123.524	1002.97	62	14350		23	123.524	109.372	55	3307		893.599	0.445706		23	123.524	2462.6	61	38819		2353.23	0.96481	0.996684			0.446505
		24	123.524	1012.24	65	17618		24	123.524	110.113	59	1295		902.128	0.44996		24	123.524	2455.54	62	36006		2345.43	0.961611	1.01317			0.450766
		25	123.524	1018.87	62	13095		25	123.524	107.617	57	1430		911.249	0.45451		25	123.524	2483.93	62	35481		2376.32	0.974274	0.98838			0.455324
		26	123.524	1007.98	57	13307		26	123.524	105.12	56	1964		902.862	0.450327		26	123.524	2453.82	64	33172		2348.7	0.962953	0.993035			0.451133
		27	123.524	1014.17	58	14020		27	123.524	104.861	54	1615		909.308	0.453542		27	123.524	2437.21	64	34632		2332.35	0.956247	0.998428			0.454354
		28	123.524	1017.48	57	12572		28	123.524	103.165	50	1822		914.315	0.456039		28	123.524	2431.84	54	30598		2328.68	0.954743	1.00959			0.456856
		29	123.524	1019.02	63	12631		29	123.524	106.87	57	1263		912.153	0.454961		29	123.524	2457.89	59	31134		2351.02	0.963901	0.98143			0.455776
		30	123.524	1025.9	62	16822		30	123.524	106.439	57	1284		919.463	0.458607		30	123.524	2413.8	62	31320		2307.36	0.946001	1.0074			0.459428
		31	123.524	1019.64	60	21591		31	123.524	110.455	58	1547		909.19	0.453483		31	123.524	2434.88	63	28650		2324.43	0.953	0.988267			0.454295
		32	123.524	1026.01	62	18349		32	123.524	105.944	58	1435		920.063	0.458906		32	123.524	2403.1	62	26766		2297.16	0.941819	1.00136			0.459728
		33	123.524	1023.26	64	16311		33	123.524	106.454	58	1150		916.809	0.457283		33	123.524	2406.72	60	29736		2300.27	0.943095	0.999128			0.458102
		34	123.524	1040.68	65	17098		34	123.524	107.751	58	2159		932.928	0.465323		34	123.524	2406.01	62	31356		2298.26	0.942273	0.991069			0.466156
		35	123.524	1050.77	61	16937		35	123.524	107.382	56	1524		943.384	0.470538		35	123.524	2385.12	66	31946		2277.74	0.933857	1.00455			0.471381
		36	123.524	1041.98	65	16063		36	123.524	106.124	56	1876		935.857	0.466784		36	123.524	2394.23	65	33299		2288.1	0.938107	0			0.46762

## Sheet: TCS 11-6-15
2015-11-06
phNpn2TCS_Neuron1_FRAP	Time	Section	Area	Mean	Min	Max		Background	Area	Mean	Min	Max		Adjusted F	%		Control	Area	Mean	Min	Max		Adjusted F	%	change	ave change		corrected %
	0	1	352.995	704.423	58	20613		1	348.041	180.557	59	9055		523.866	1		1	373.163	1590.91	61	65535		1410.35	1	0.993397	0.996203		1
	0.5	2	352.995	698.532	58	22342		2	348.041	177.577	61	8701		520.955	0.994443		2	373.163	1578.61	66	65535		1401.04	0.993397	0.997662			0.998233
	1	3	352.995	692.991	63	29008		3	348.041	181.033	61	7711		511.958	0.977269		3	373.163	1578.79	61	65535		1397.76	0.991074	0.986893			0.980993
	1.5	4	352.995	698.942	61	24402		4	348.041	180.4	58	7780		518.542	0.989837		4	373.163	1559.84	64	65535		1379.44	0.978084	1.00108			0.993609
	2	5	352.995	690.72	60	24146		5	348.041	179.386	56	8023		511.334	0.976078		5	373.163	1560.31	67	65535		1380.92	0.979136	0.982069			0.979798
	2.5	6	352.995	308.029	55	7226		6	348.041	171.053	52	7056		136.976	0.261471		6	373.163	1527.22	58	65315		1356.16	0.96158	0.958918			0.262468
	3	7	352.995	323.166	52	9705		7	348.041	173.878	56	8263		149.288	0.284974		7	373.163	1474.33	57	65535		1300.45	0.922076	1.04457			0.28606
	3.5	8	352.995	349.03	56	8525		8	348.041	171.163	55	6908		177.867	0.339528		8	373.163	1529.57	62	65535		1358.41	0.963173	1.00486			0.340822
	4	9	352.995	363.957	57	9543		9	348.041	172.637	56	8338		191.32	0.365208		9	373.163	1537.65	61	65535		1365.01	0.967853	0.977382			0.3666
	4.5	10	352.995	371.254	57	11310		10	348.041	172.18	54	6014		199.074	0.380009		10	373.163	1506.32	59	65535		1334.14	0.945962	1.00086			0.381458
	5	11	352.995	375.782	58	8841		11	348.041	177.008	49	8241		198.774	0.379437		11	373.163	1512.3	59	65535		1335.29	0.946777	0.996039			0.380883
	5.5	12	352.995	382.278	56	7758		12	348.041	173.626	56	6677		208.652	0.398293		12	373.163	1503.62	62	63438		1330	0.943027	1.00242			0.399811
	6	13	352.995	385.353	55	10250		13	348.041	174.601	54	7036		210.752	0.402301		13	373.163	1507.82	64	65535		1333.22	0.945314	0.991891			0.403835
	6.5	14	352.995	387.872	55	10095		14	348.041	174.951	56	6428		212.921	0.406442		14	373.163	1497.36	63	65535		1322.41	0.937648	1.007			0.407991
	7	15	352.995	393.289	56	8710		15	348.041	175.054	56	5902		218.235	0.416586		15	373.163	1506.73	64	65535		1331.67	0.944214	0.994307			0.418173
	7.5	16	352.995	388.581	57	9750		16	348.041	171.027	53	6687		217.554	0.415286		16	373.163	1495.12	61	65535		1324.09	0.938839	0.990234			0.416868
	8	17	352.995	394.272	60	10291		17	348.041	174.41	54	7267		219.862	0.419691		17	373.163	1485.57	62	65535		1311.16	0.92967	1.00121			0.421291
	8.5	18	352.995	400.137	61	9345		18	348.041	176.958	62	5202		223.179	0.426023		18	373.163	1489.71	62	65535		1312.75	0.930796	0.995971			0.427647
	9	19	352.995	401.29	58	9792		19	348.041	178.071	59	5328		223.219	0.426099		19	373.163	1485.53	60	65535		1307.46	0.927046	1.0042			0.427723
	9.5	20	352.995	401.639	58	7744		20	348.041	173.909	58	6876		227.73	0.43471		20	373.163	1486.86	62	65535		1312.95	0.930939	0.9729			0.436367
	10	21	352.995	405.233	53	8548		21	348.041	174.46	52	6487		230.773	0.440519		21	373.163	1451.83	61	65535		1277.37	0.905711	1.00071			0.442198
	10.5	22	352.995	407.45	56	8182		22	348.041	177.376	55	5657		230.074	0.439185		22	373.163	1455.66	62	65535		1278.28	0.906357	0.998662			0.440859
	11	23	352.995	411.993	57	9383		23	348.041	176.424	56	6622		235.569	0.449674		23	373.163	1452.99	64	65535		1276.57	0.905144	0.994113			0.451388
	11.5	24	352.995	410.995	61	9015		24	348.041	177.861	58	7707		233.134	0.445026		24	373.163	1446.92	65	65535		1269.05	0.899816	1.01089			0.446722
	12	25	352.995	412.125	56	9070		25	348.041	173.712	57	5250		238.413	0.455103		25	373.163	1456.58	58	65535		1282.87	0.909612	0.990326			0.456837
	12.5	26	352.995	407.485	58	8940		26	348.041	171.74	57	5894		235.745	0.45001		26	373.163	1442.2	63	65014		1270.46	0.900812	0.999484			0.451725
	13	27	352.995	411.689	56	8410		27	348.041	172.916	59	6493		238.773	0.45579		27	373.163	1442.72	64	63979		1269.81	0.900347	0.990837			0.457527
	13.5	28	352.995	416.39	62	8727		28	348.041	175.312	59	5254		241.078	0.46019		28	373.163	1433.48	63	63837		1258.17	0.892098	0.992426			0.461944
	14	29	352.995	415.853	57	11031		29	348.041	175.637	57	5303		240.216	0.458545		29	373.163	1424.28	59	65028		1248.64	0.885341	1.00282			0.460292
	14.5	30	352.995	415.202	59	8807		30	348.041	176.613	59	6917		238.589	0.455439		30	373.163	1428.77	63	65305		1252.16	0.887837	1.00325			0.457175
	15	31	352.995	421.294	57	11128		31	348.041	174.033	57	6315		247.261	0.471993		31	373.163	1430.26	64	58468		1256.23	0.890719	0.98541			0.473792
	15.5	32	352.995	414.065	58	7999		32	348.041	176.237	59	7528		237.828	0.453986		32	373.163	1414.13	61	65535		1237.9	0.877724	1.01383			0.455716
	16	33	352.995	415.15	59	9724		33	348.041	173.173	58	6677		241.977	0.461906		33	373.163	1428.19	61	65535		1255.02	0.889864	0.987117			0.463667
	16.5	34	352.995	421.613	54	9064		34	348.041	171.838	55	6448		249.775	0.476792		34	373.163	1410.69	62	65535		1238.85	0.878399	0.996474			0.478609
	17	35	352.995	421.519	57	10882		35	348.041	177.809	58	6107		243.71	0.465214		35	373.163	1412.29	65	64180		1234.48	0.875302	0.996907			0.466987
	17.5	36	352.995	435.839	62	17602		36	348.041	175.586	59	5620		260.253	0.496793		36	373.163	1406.25	64	65535		1230.66	0.872595	0			0.498686
phNpn2TCS_Neuron2_FRAP	Time	Section	Area	Mean	Min	Max		Background	Area	Mean	Min	Max		Adjusted F	%		Control	Area	Mean	Min	Max		Adjusted F	%	change	ave change		corrected %
	0	1	488.231	661.77	59	29205		1	197.89	153.07	59	2807		508.7	1		1	388.148	682.793	62	14179		529.723	1	1.03312	0.997138		1
	0.5	2	488.231	653.136	60	30816		2	197.89	151.51	61	2461		501.626	0.986094		2	388.148	698.778	59	17852		547.268	1.03312	0.986824			0.988925
	1	3	488.231	650.404	60	37579		3	197.89	151.272	57	2596		499.132	0.981191		3	388.148	691.329	59	18332		540.057	1.01951	0.992429			0.984008
	1.5	4	488.231	655.172	57	29006		4	197.89	150.432	58	3767		504.74	0.992215		4	388.148	686.4	59	13613		535.968	1.01179	1.00447			0.995064
	2	5	488.231	662.258	61	41058		5	197.89	151.521	60	3152		510.737	1.004		5	388.148	689.887	63	13823		538.366	1.01632	1.01092			1.00689
	2.5	6	488.231	292.904	62	11594		6	197.89	155.521	59	3013		137.383	0.270067		6	388.148	699.768	59	15524		544.247	1.02742	0.97808			0.270842
	3	7	488.231	306.42	62	11348		7	197.89	149.006	59	2984		157.414	0.309444		7	388.148	681.323	65	14299		532.317	1.0049	1.01691			0.310332
	3.5	8	488.231	332.777	58	14773		8	197.89	152.566	60	3826		180.211	0.354258		8	388.148	693.886	56	15042		541.32	1.02189	0.97975			0.355275
	4	9	488.231	340.343	59	12135		9	197.89	152.948	61	3021		187.395	0.36838		9	388.148	683.306	63	14390		530.358	1.0012	1.02795			0.369438
	4.5	10	488.231	350.439	59	10063		10	197.89	151.323	59	2527		199.116	0.391421		10	388.148	696.503	61	14843		545.18	1.02918	0.999277			0.392545
	5	11	488.231	357.72	62	10305		11	197.89	154.888	63	5402		202.832	0.398726		11	388.148	699.674	65	15488		544.786	1.02844	0.980993			0.399871
	5.5	12	488.231	370.266	62	13150		12	197.89	154.867	62	3007		215.399	0.42343		12	388.148	689.298	66	13610		534.431	1.00889	0.991649			0.424646
	6	13	488.231	365.096	58	15797		13	197.89	153.463	59	2868		211.633	0.416027		13	388.148	683.431	61	14970		529.968	1.00046	1.00279			0.417221
	6.5	14	488.231	378.319	60	15993		14	197.89	155.735	60	1863		222.584	0.437555		14	388.148	687.182	60	13012		531.447	1.00325	0.996466			0.438811
	7	15	488.231	378.93	61	18940		15	197.89	156.112	59	2138		222.818	0.438015		15	388.148	685.681	61	14933		529.569	0.999709	0.98789			0.439272
	7.5	16	488.231	384.256	64	16167		16	197.89	157.597	64	4236		226.659	0.445565		16	388.148	680.753	64	14305		523.156	0.987603	0.990368			0.446844
	8	17	488.231	388.167	62	13940		17	197.89	156.349	61	2446		231.818	0.455707		17	388.148	674.466	65	16915		518.117	0.97809	0.997226			0.457015
	8.5	18	488.231	394.928	64	16757		18	197.89	155.776	64	2635		239.152	0.470124		18	388.148	672.456	64	14037		516.68	0.975378	1.01155			0.471473
	9	19	488.231	393.838	65	16136		19	197.89	159.58	62	3895		234.258	0.460503		19	388.148	682.228	62	12382		522.648	0.986644	0.994224			0.461825
	9.5	20	488.231	395.392	64	16135		20	197.89	158.964	64	2724		236.428	0.464769		20	388.148	678.593	65	13553		519.629	0.980945	1.00104			0.466103
	10	21	488.231	395.5	64	15435		21	197.89	156.113	63	2690		239.387	0.470586		21	388.148	676.283	63	14915		520.17	0.981966	0.983924			0.471937
	10.5	22	488.231	402.74	61	13627		22	197.89	155.505	60	3512		247.235	0.486013		22	388.148	667.313	62	13595		511.808	0.96618	1.00637			0.487409
	11	23	488.231	405.256	60	15635		23	197.89	153.995	60	2724		251.261	0.493928		23	388.148	669.063	63	17357		515.068	0.972335	0.996492			0.495346
	11.5	24	488.231	409.547	63	18359		24	197.89	160.497	62	2872		249.05	0.489581		24	388.148	673.758	65	15755		513.261	0.968923	0.998112			0.490987
	12	25	488.231	410.409	58	18084		25	197.89	155.336	60	3055		255.073	0.501421		25	388.148	667.628	62	15219		512.292	0.967094	0.992413			0.502861
	12.5	26	488.231	412.806	58	16346		26	197.89	153.565	58	2993		259.241	0.509615		26	388.148	661.97	61	15533		508.405	0.959756	0.998568			0.511078
	13	27	488.231	414.192	59	17192		27	197.89	155.523	61	2543		258.669	0.50849		27	388.148	663.2	64	15648		507.677	0.958382	0.984732			0.50995
	13.5	28	488.231	410.5	59	17948		28	197.89	154.202	60	2178		256.298	0.503829		28	388.148	654.128	59	15722		499.926	0.94375	1.0056			0.505276
	14	29	488.231	416.299	62	15835		29	197.89	156.649	61	3491		259.65	0.510419		29	388.148	659.375	61	13810		502.726	0.949036	0.962634			0.511884
	14.5	30	488.231	412.266	62	14859		30	197.89	157.631	63	3549		254.635	0.50056		30	388.148	641.572	60	13979		483.941	0.913574	1.00681			0.501997
	15	31	488.231	415.452	61	16342		31	197.89	153.093	55	2252		262.359	0.515744		31	388.148	640.33	64	17952		487.237	0.919796	0.99654			0.517225
	15.5	32	488.231	413.517	57	16591		32	197.89	153.737	59	2966		259.78	0.510674		32	388.148	639.288	59	13160		485.551	0.916613	0.99812			0.51214
	16	33	488.231	411.807	59	16125		33	197.89	155.02	61	1739		256.787	0.504791		33	388.148	639.658	62	16034		484.638	0.914889	1.02079			0.50624
	16.5	34	488.231	414.293	63	16836		34	197.89	156.213	65	2844		258.08	0.507332		34	388.148	650.926	61	16275		494.713	0.933909	0.9737			0.508789
	17	35	488.231	421.581	61	19359		35	197.89	154.629	61	3017		266.952	0.524773		35	388.148	636.331	66	18902		481.702	0.909347	0.991075			0.526279
	17.5	36	488.231	415.568	59	19866		36	197.89	156.103	59	2141		259.465	0.510055		36	388.148	633.506	59	14564		477.403	0.901231	0			0.511519
phNpn2TCS_Neuron3_FRAP	Time	Section	Area	Mean	Min	Max		Background	Area	Mean	Min	Max		Adjusted F	%		Control	Area	Mean	Min	Max		Adjusted F	%	change	ave change		corrected %
		1	235.564	1512.6	66	35760		1	235.564	244.854	62	5207		1267.74	1		1	235.564	773.734	63	20965		528.88	1	0.989083	0.99842		1
		2	235.564	1531.49	68	31955		2	235.564	248.434	63	3038		1283.06	1.01208		2	235.564	771.54	63	20069		523.106	0.989083	0.998738			1.01368
		3	235.564	1517.8	66	30794		3	235.564	239.702	60	3848		1278.1	1.00817		3	235.564	762.148	60	21788		522.446	0.987835	0.984774			1.00977
		4	235.564	1502.39	65	28945		4	235.564	246.496	65	3913		1255.9	0.990658		4	235.564	760.987	62	21372		514.491	0.972793	1.0061			0.992225
		5	235.564	1523.09	61	35267		5	235.564	245.248	58	3679		1277.85	1.00797		5	235.564	762.879	61	19190		517.631	0.978731	0.990115			1.00956
		6	235.564	708.533	61	8965		6	235.564	241.732	60	2629		466.801	0.368215		6	235.564	754.246	60	21267		512.514	0.969055	0.975515			0.368797
		7	235.564	785.326	66	11108		7	235.564	240.466	63	2853		544.86	0.429788		7	235.564	740.431	58	18854		499.965	0.945328	1.01943			0.430468
		8	235.564	898.602	64	14845		8	235.564	243.002	61	3440		655.6	0.51714		8	235.564	752.681	61	22335		509.679	0.963695	1.01414			0.517958
		9	235.564	963.262	62	12769		9	235.564	244.16	61	2882		719.102	0.567231		9	235.564	761.047	62	19408		516.887	0.977324	0.956813			0.568128
		10	235.564	981.974	65	16497		10	235.564	250.637	62	3320		731.337	0.576882		10	235.564	745.201	60	20693		494.564	0.935116	1.00854			0.577794
		11	235.564	1012.86	63	16057		11	235.564	248.036	59	2849		764.827	0.603299		11	235.564	746.823	56	19677		498.787	0.943101	1.00075			0.604253
		12	235.564	1031.28	63	15152		12	235.564	245.792	63	2490		785.492	0.619599		12	235.564	744.954	61	24249		499.162	0.94381	1.00137			0.620579
		13	235.564	1050.83	62	15796		13	235.564	247.616	59	3403		803.216	0.63358		13	235.564	747.463	57	28150		499.847	0.945105	1.00871			0.634582
		14	235.564	1065.09	60	15185		14	235.564	242.891	60	3618		822.199	0.648554		14	235.564	747.091	54	23952		504.2	0.953335	0.989929			0.64958
		15	235.564	1080.52	61	14865		15	235.564	247.817	59	3363		832.702	0.656839		15	235.564	746.939	61	22449		499.122	0.943734	1.0452			0.657878
		16	235.564	1104.39	63	15671		16	235.564	249.031	59	2970		855.355	0.674707		16	235.564	770.712	62	24338		521.681	0.986388	0.994012			0.675775
		17	235.564	1131.82	58	13878		17	235.564	245.364	61	3583		886.458	0.699242		17	235.564	763.921	59	21055		518.557	0.980481	1.01894			0.700348
		18	235.564	1134.83	64	14454		18	235.564	244.074	62	2934		890.756	0.702632		18	235.564	772.451	61	20988		528.377	0.999049	0.967073			0.703743
		19	235.564	1150.07	62	15907		19	235.564	244.247	59	3315		905.824	0.714518		19	235.564	755.226	59	22936		510.979	0.966153	1.00528			0.715648
		20	235.564	1146.53	63	15314		20	235.564	243.401	62	2904		903.132	0.712394		20	235.564	757.077	60	24918		513.676	0.971252	0.978078			0.713521
		21	235.564	1145.36	57	15620		21	235.564	242.897	55	4032		902.462	0.711866		21	235.564	745.312	57	21196		502.415	0.94996	0.992618			0.712992
		22	235.564	1156.23	62	15602		22	235.564	243.168	60	2974		913.065	0.720229		22	235.564	741.874	56	21668		498.706	0.942947	1.00933			0.721369
		23	235.564	1170.82	62	13962		23	235.564	246.174	60	3281		924.647	0.729365		23	235.564	749.533	61	20177		503.359	0.951745	1.08575			0.730519
		24	235.564	1161.7	67	15188		24	235.564	244.431	64	3086		917.269	0.723545		24	235.564	790.953	62	20678		546.522	1.03336	1.00047			0.72469
		25	235.564	1169.94	63	13610		25	235.564	240.83	57	2535		929.111	0.732887		25	235.564	787.607	58	25907		546.777	1.03384	0.930292			0.734046
		26	235.564	1182.32	64	14508		26	235.564	246.255	61	3039		936.064	0.738371		26	235.564	754.917	61	21149		508.662	0.961772	1.00426			0.739539
		27	235.564	1194.45	56	15554		27	235.564	241.937	58	3550		952.516	0.751348		27	235.564	752.765	59	26425		510.828	0.965867	0.978051			0.752537
		28	235.564	1210.21	60	15457		28	235.564	243.987	61	4633		966.222	0.76216		28	235.564	743.603	61	24728		499.616	0.944668	0.988453			0.763366
		29	235.564	1202.02	63	18909		29	235.564	245.948	58	3104		956.076	0.754157		29	235.564	739.795	61	21148		493.847	0.93376	1.00918			0.75535
		30	235.564	1210.86	63	19042		30	235.564	244.314	61	2873		966.544	0.762414		30	235.564	742.695	58	21445		498.381	0.942333	0.998357			0.76362
		31	235.564	1217.81	64	14224		31	235.564	242.888	60	2696		974.925	0.769025		31	235.564	740.45	61	20835		497.562	0.940784	0.985945			0.770241
		32	235.564	1220.2	64	15516		32	235.564	242.832	62	2489		977.372	0.770955		32	235.564	733.401	60	23474		490.569	0.927562	1.03171			0.772175
		33	235.564	1196.29	58	15362		33	235.564	243.394	61	3898		952.899	0.751651		33	235.564	749.517	63	24246		506.123	0.956971	0.974062			0.75284
		34	235.564	1219.42	69	15660		34	235.564	252.598	64	3256		966.825	0.762635		34	235.564	745.593	63	22889		492.995	0.932149	0.999892			0.763842
		35	235.564	1206.98	64	16182		35	235.564	244.823	62	2781		962.159	0.758955		35	235.564	737.765	58	22610		492.942	0.932049	1.00377			0.760156
		36	235.564	1207.48	63	15155		36	235.564	242.907	59	3977		964.572	0.760858		36	235.564	737.707	60	20709		494.8	0.935562	0			0.762062
phNpn2TCS_Neuron4_FRAP	Time	Section	Area	Mean	Min	Max		Background	Area	Mean	Min	Max		Adjusted F	%		Control	Area	Mean	Min	Max		Adjusted F	%	change	ave change		corrected %
		1	239.643	691.186	60	32944		1	239.643	145.259	60	2209		545.927	1		1	239.643	489.363	60	11501		344.104	1	0.986208	1.00189		1
		2	239.643	679.986	61	37376		2	239.643	147.68	61	1579		532.306	0.97505		2	239.643	487.038	63	13285		339.358	0.986208	0.97741			0.973208
		3	239.643	677.941	62	44305		3	239.643	148.505	62	1868		529.436	0.969793		3	239.643	480.197	60	11771		331.692	0.96393	0.994691			0.967961
		4	239.643	680.319	63	45035		4	239.643	149.972	61	1990		530.347	0.971461		4	239.643	479.903	62	11338		329.931	0.958812	1.04729			0.969627
		5	239.643	683.556	65	36854		5	239.643	148.704	64	1799		534.852	0.979713		5	239.643	494.237	62	13248		345.533	1.00415	0.966327			0.977863
		6	239.643	311.874	65	10581		6	239.643	148.002	63	2462		163.872	0.300172		6	239.643	481.9	63	10894		333.898	0.97034	0.970928			0.299605
		7	239.643	322.932	65	13234		7	239.643	146.442	64	1933		176.49	0.323285		7	239.643	470.633	64	13143		324.191	0.942131	1.0644			0.322674
		8	239.643	353.771	65	11395		8	239.643	146.443	60	2292		207.328	0.379772		8	239.643	491.511	63	12165		345.068	1.0028	1.0132			0.379055
		9	239.643	372.905	64	15947		9	239.643	147.447	60	1781		225.458	0.412982		9	239.643	497.071	65	12674		349.624	1.01604	0.987429			0.412202
		10	239.643	375.125	63	15467		10	239.643	149.001	62	2063		226.124	0.414202		10	239.643	494.23	65	14727		345.229	1.00327	1.02534			0.41342
		11	239.643	388.924	65	14334		11	239.643	149.523	64	2443		239.401	0.438522		11	239.643	503.499	67	12466		353.976	1.02869	0.952033			0.437694
		12	239.643	394.125	66	10740		12	239.643	152.54	66	3384		241.585	0.442523		12	239.643	489.537	65	10739		336.997	0.979346	1.0561			0.441687
		13	239.643	406.333	67	9921		13	239.643	151.828	65	1658		254.505	0.466189		13	239.643	507.729	65	11648		355.901	1.03428	1.02304			0.465308
		14	239.643	412.965	68	12838		14	239.643	150.97	64	1734		261.995	0.479908		14	239.643	515.07	66	12978		364.1	1.05811	0.993678			0.479002
		15	239.643	413.562	64	13834		15	239.643	152.362	65	1896		261.2	0.478452		15	239.643	514.16	63	11422		361.798	1.05142	1.01785			0.477549
		16	239.643	418.826	64	14402		16	239.643	148.161	62	2116		270.665	0.49579		16	239.643	516.417	64	11779		368.256	1.07019	1.00843			0.494853
		17	239.643	427.937	59	16847		17	239.643	148.716	60	1791		279.221	0.511462		17	239.643	520.077	63	11446		371.361	1.07921	0.96952			0.510496
		18	239.643	425.709	67	15649		18	239.643	150.876	66	1932		274.833	0.503424		18	239.643	510.918	66	10832		360.042	1.04632	0.986141			0.502474
		19	239.643	435.906	66	14956		19	239.643	152.387	65	1779		283.519	0.519335		19	239.643	507.439	68	14377		355.052	1.03182	1.03225			0.518354
		20	239.643	432.817	63	14033		20	239.643	151.621	62	2067		281.196	0.51508		20	239.643	518.125	66	13117		366.504	1.0651	0.983433			0.514107
		21	239.643	435.667	65	17229		21	239.643	148.916	63	1763		286.751	0.525255		21	239.643	509.348	62	11381		360.432	1.04745	0.978562			0.524263
		22	239.643	441.053	65	19625		22	239.643	150.32	65	2458		290.733	0.532549		22	239.643	503.025	68	11429		352.705	1.025	1.01028			0.531543
		23	239.643	448.143	60	15779		23	239.643	147.59	61	1613		300.553	0.550537		23	239.643	503.921	63	9975		356.331	1.03553	0.972691			0.549497
		24	239.643	439.015	64	21241		24	239.643	148.803	64	3976		290.212	0.531595		24	239.643	495.403	62	13346		346.6	1.00725	1.0097			0.530591
		25	239.643	444.783	64	16934		25	239.643	145.665	60	1764		299.118	0.547908		25	239.643	495.626	63	12639		349.961	1.01702	0.970742			0.546874
		26	239.643	446.649	60	16507		26	239.643	153.581	63	3156		293.068	0.536826		26	239.643	493.303	65	9885		339.722	0.987265	1.02236			0.535812
		27	239.643	447.173	61	19469		27	239.643	147.371	59	1686		299.802	0.549161		27	239.643	494.69	59	11272		347.319	1.00934	1.01348			0.548124
		28	239.643	446.535	63	15972		28	239.643	150.364	60	2385		296.171	0.54251		28	239.643	502.365	64	11264		352.001	1.02295	1.01415			0.541486
		29	239.643	450.92	65	13296		29	239.643	148.955	60	1957		301.965	0.553123		29	239.643	505.936	59	10897		356.981	1.03742	1.00345			0.552079
		30	239.643	446.427	61	15765		30	239.643	151.369	60	2195		295.058	0.540472		30	239.643	509.582	59	13921		358.213	1.041	1.01929			0.539451
		31	239.643	448.629	62	12519		31	239.643	153.512	60	1686		295.117	0.54058		31	239.643	518.636	60	14226		365.124	1.06109	1.00186			0.539559
		32	239.643	443.778	61	8420		32	239.643	152.137	64	2025		291.641	0.534212		32	239.643	517.94	62	13973		365.803	1.06306	0.996252			0.533204
		33	239.643	450.386	60	13134		33	239.643	152.091	62	2508		298.295	0.546401		33	239.643	516.523	62	12872		364.432	1.05908	0.987298			0.545369
		34	239.643	443.171	62	10866		34	239.643	152.39	62	2369		290.781	0.532637		34	239.643	512.193	63	12762		359.803	1.04562	1.02266			0.531631
		35	239.643	461.79	67	11603		35	239.643	154.543	61	1911		307.247	0.562799		35	239.643	522.498	65	14228		367.955	1.06931	0.987759			0.561736
		36	239.643	450.925	60	10075		36	239.643	150.554	58	2187		300.371	0.550204		36	239.643	514.005	65	12686		363.451	1.05622	0			0.549164
