# Supplementary material for: Palmitoylation regulates neuropilin-2 localization and function in cortical neurons and conveys specificity to semaphorin signaling via palmitoyl acyltransferases
Source: eLife. 2023 Apr 3;12:e83217. doi: 10.7554/eLife.83217 (PMC10069869; doi:10.7554/eLife.83217)
Supplement: Figure 4—figure supplement 1—source data 1. [file elife-83217-fig4-figsupp1-data1.xlsx]

## Sheet: Sheet1
pHluorin-Nrp-2 in Nrp-2-/- cortical neurons: Cumulative data
Sema3F-AP					AP
Backbone	WT	TCS	C922S/C923S	Full CS	Backbone	WT	TCS	C922S/C923S	Full CS
0.9	0.36	0.1	0.56	0.7	0.46	0.56	0.74	0.74	0.54
0.78	0.22	0.24	0.1	0.86	0.48	0.88	0.06	0.4	0.5
0.18	0.3	0.74	0.1	0.58	0.7	0.44	0.24	0.44	0.6
0.5	0.2	0.48	0.12	1	0.54	0.32	0.28	0.56	0.88
0.3	0.2	0.52	0.16	0.64	0.32	0.3	0.6	0.68	0.5
0.38	0.6	0.44	0.16	0.7	0.34	0.32	0.54	0.38	0.56
0.66	0.46	0.76	0.06	0.38	1	0.76	0.6	0.6	0.84
0.62	0.52	0.42	0.34	0.44	0.44	0.24	0.78	0.18	0.4
0.4	0.26	0.36	0.16	1	0.4	0.68	0.46	0.06	0.66
0.92	0.72	0.42	0.46	0.52	0.34	0.62	0.48	0.36	0.3
0.72	0.22	0.38	0.22	0.34	0.46	0.46	0.52	0.26	0.62
0.52	0.4	0.38	0.56	0.94	0.5	0.5	0.7	0.58	0.86
0.88	0.1	0.64	0.44	0.24	0.72	0.18	0.54
0.28	0.42	0.52	0.14	0.3	0.64	0.68	0.56
0.58	0.68	0.7		0.36	0.56	0.16	0.8
0.6	0.58	0.68		0.58	0.64	0.42	0.46
0.4	0.06	0.5		0.46	0.42	0.52	0.44
0.4	0.38	0.4		0.9	0.58	0.56	0.88
0.84	0.34	0.6		0.68	0.58	0.7
0.38	0.4	0.1		0.48	0.92	0.38
0.84	0.2	0.82		0.28	0.36	0.28
0.38	0.7	0.5		0.4	0.4	0.46
0.36	0.24	0.8		0.64	0.84	0.18
0.78	0.14	0.18			0.36	0.42
0.42	0.1	0.58			0.62	0.44
0.4	0.32	0.44			0.4	0.2
0.4	0.12	0.38			0.74	0.2
0.48	0.16	0.32			0.62	0.14
0.56	0.16	0.6			1.04	0.92
0.4	0.1	0.44			0.56	0.48
0.72	0.36	0.44			0.68	0.44
0.5		0.3			0.74	0.46
0.24					0.48	0.4
0.56					0.52	0.2
0.28					0.46
0.62					0.52
0.4					0.64
0.34					0.4
0.48					0.74
0.32					0.74
0.4					0.64
0.14					0.68
0.1					0.44
0.86					0.68
0.44					0.62
					0.48
					0.12
					0.58
