# Supplementary material for: Palmitoylation regulates neuropilin-2 localization and function in cortical neurons and conveys specificity to semaphorin signaling via palmitoyl acyltransferases
Source: eLife. 2023 Apr 3;12:e83217. doi: 10.7554/eLife.83217 (PMC10069869; doi:10.7554/eLife.83217)
Supplement: Figure 4—source data 1. [file elife-83217-fig4-data1.xlsx]

## Sheet: Sheet1
WT	C878S	C885S	C887S	C897S	C922S/C923S	pCIG2-EGFP	RIGHT: AP treatment	WT	C878S	C885S	C887S	C897S	C922S/C923S	pCIG2-EGFP
0.44	0.52	0.66	0.7	0.86	0.42	0.7	LEFT: Sema3F-AP treatment	0.7	0.46	0.96	0.78	1.18	0.84	0.72
0.38	0.7	0.86	0.54	0.52	0.76	0.5		0.68	0.4	0.62	0.94	0.9	0.62	1.14
0.3	0.52	0.38	0.7	0.44	0.5	0.78		0.82	1.16	1	0.98	0.88	0.68	0.82
0.4	0.82	0.42	1.12	0.82	0.72	0.9		0.66	1	0.64	0.98	0.8	1.26	0.98
0.52	0.86	0.94	0.42	0.42	0.3	0.38		0.9	1.04	0.64	1.04	1.02	1.08	0.4
0.5	0.7	0.68	0.94	0.36	0.52	0.76		0.52	0.76	0.68	0.54	0.62	0.68	0.96
0.38	0.54	0.54	0.88	0.64	0.68	1.12		0.68	0.92	0.48	0.94	0.74	0.6	1.06
0.32	0.3	0.82	1	0.28	0.72	1.14		0.92	0.78	1.12	0.54	0.72	1.06	0.76
0.5	0.44	0.68	0.54	0.58	0.5	1.08		0.66	0.74	1.08	0.92	0.7	0.6	0.7
0.88	0.98	1	0.66	0.6	0.38	0.8		0.82	0.58	0.58	0.92	0.38	0.92	1.08
0.62	0.98	0.62	0.44	0.62	0.38	0.9		0.84	0.8	0.82	1.02	1.08	0.84	1.02
0.76	0.62	0.64	0.8	0.52	0.4	1.1		0.46	1.14	0.6	0.52	0.82	0.8	1.2
0.68	0.66	0.76	0.56	0.72	0.66	0.8		0.64	0.64	1.68	0.88	0.52	1.1	0.48
0.48	0.42	0.74	0.58	0.74	0.32	0.88		0.26	0.8	1.18	0.86	0.6	0.82	0.46
0.34	0.42	0.42	0.7	0.58	0.54	0.66		0.88	0.86	1.38	0.58	0.56	1.06	0.34
0.8	0.84	0.5	1.06	0.6	0.48	1.06		0.6	0.92	0.8	1	0.54	0.24	1.1
0.44	0.94	0.66	0.58	0.48	0.66	0.96		1	0.8	1.4	1.12	0.8	0.78	0.56
0.9	0.98	1.4	1.14	0.44	0.36	1.18		0.8	0.62	1.02	0.6	0.52	0.86	0.5
0.32	0.98	0.44	0.76	0.72	0.62	1		0.8	0.58	0.72	0.78	1	0.64	0.94
0.48	0.66	0.82	1.2	0.78	0.62	0.7		0.7	1.4	0.6	1.06	0.74	1.08	1.2
0.28	0.78	0.84	1.1	1.2	0.82	0.82		1.18	0.98	0.8	0.76	0.72	1	0.56
0.34	0.78	0.72	1.5	0.2	0.82	0.7		0.72	1.22	1.08	0.76	0.74	0.8	0.86
0.28	0.46	0.42	0.68	0.64	0.64	0.96		0.66	0.54	1.28	1.04	0.8	0.48	1.06
0.72	0.78	0.56	1.18	0.8	0.78	0.76		0.54	0.74	0.8	0.86	0.56	0.9	0.9
0.56	0.48	0.56	0.8	0.62	0.76	1.1		0.68	0.56	0.96	0.98	0.64	0.66	1.18
0.28	1.02	0.68	0.5	0.54	0.9	0.64		0.82	0.62	0.68	1.06	0.46	0.66	1.08
0.48	1.14	0.48	0.6	0.24	0.88	0.86		0.78		0.72	0.74	1.08	0.74	1.24
1.02	0.78	0.24	0.6	0.8	0.54	1		0.68		0.76	1.02	0.52	0.66	1.1
0.5	0.2	0.94	0.66	0.66	0.84	0.74		0.72		0.84	0.82	0.5	0.56	1.48
0.4	0.72	0.24	1.26	0.78	0.6	0.94		0.74		1	1	0.5	0.78	0.74
0.44	1.12	0.46	1	0.64	0.72	1.08		0.78		0.84	1.26	0.72	1.06	1.14
0.24	0.18	0.96	0.7	0.42	0.7	0.96		0.42		0.62	0.44	0.8	0.3	1.3
0.6	0.68	0.92	1.1	0.86	0.64	0.72		0.72		0.84	1.06	0.7	0.74	1.16
0.84	1.02	0.5	0.9	0.4	0.66	1.06		0.68		0.52	0.72	0.74	0.24	0.7
0.26	0.64	0.52	0.52	0.96	0.5	1		0.6		0.9	1.26	0.56	0.64	1
0.28	0.36	0.26	0.36	0.86	0.4	0.94		0.8		1.1	0.68	0.52	0.68	0.62
0.64	0.7	1.48	0.6	0.6	0.8	0.54		0.56			0.78		0.58	1.18
0.38	0.8	0.44	0.48	0.34	0.4	1		0.2			0.54		0.78	0.96
0.6	0.88	0.6	0.86		0.34	0.44		0.64			0.64		0.84	0.96
0.58		1.08	0.86		0.4	0.82		0.64			0.6		0.52	1.04
0.7		0.62	1.1		0.36	0.88		1			0.6		0.94	1.26
0.78		0.54	0.84		0.86	1.06		0.3			0.66		0.8	0.92
0.5		0.44	0.76		0.34	0.76		0.54			0.78		0.68	0.66
0.82		0.36	0.6		0.72	0.7		0.5			0.8		0.7	0.66
0.72		0.66	0.98		0.1			0.68			0.9		0.86	1.52
0.56		0.6	0.78		0.84			0.62			0.66		0.74	1.16
0.8			0.46		0.24			0.58			0.6		0.54	1.06
0.18			0.72		0.68			0.62			0.78		0.7	1.14
0.62			0.68		0.68			0.54			0.86		0.32	0.98
0.48			0.96		0.5			0.12			1.12		0.34	1.06
0.48			1.02		0.56			0.6			0.76		0.72	0.74
0.54			0.92		0.36			0.48			0.52		0.64	0.94
0.38			1.2		0.68			0.84			0.6		0.8	0.8
0.4			0.84					0.36					0.8	0.76
0.48			0.7					0.2					0.58	1.26
0.62			0.58					0.2					0.5
0.8			0.92					0.88					0.78
0.52			1.04					0.6					1.1
0.36			0.58					0.72					0.72
0.56			0.84					0.72					0.52
0.42								0.48					1.14
0.62								0.64					0.68
0.24								0.44					0.24
								1.12					0.86
								0.56
								0.52
								0.8
WT	C878S	C885S	C887S	C897S	C922S/C923S	pCIG2-EGFP	RIGHT: AP treatment, LEFT: Sema3F-AP treatment	WT	C878S	C885S	C887S	C897S	C922S/C923S	pCIG2-EGFP
0.519683	0.702564	0.654348	0.801667	0.612632	0.577358	0.860909		0.650149	0.81	0.881667	0.823774	0.713333	0.7325	0.938182	Average
0.190161	0.246242	0.265486	0.246007	0.210658	0.189495	0.193857		0.208817	0.248081	0.273491	0.201878	0.19373	0.226933	0.267977	STDEV
0.02396	0.03943	0.039144	0.03176	0.034	0.02603	0.029225		0.0255	0.048653	0.045582	0.02773	0.032	0.028367	0.036134	SEM
Note: for Npn2 WT (Sema3F-AP and AP treatments) I have cumulative data from Npn2 rescue 09 and 10
