# Supplementary material for: Palmitoylation regulates neuropilin-2 localization and function in cortical neurons and conveys specificity to semaphorin signaling via palmitoyl acyltransferases
Source: eLife. 2023 Apr 3;12:e83217. doi: 10.7554/eLife.83217 (PMC10069869; doi:10.7554/eLife.83217)
Supplement: Figure 4—source data 4. [file elife-83217-fig4-data4.xlsx]

## Sheet: Sheet1
ABE assay #/ Nrp-2 Immunoblots
31st ABE_2 hrs	+HA-samples	Inputs	+HA/Input	% normalized
AP	3329.05	18150.1	0.18	100
Sema3F-AP	10232	17025	0.6	333
31st ABE_6 hrs	+HA-samples	Inputs	+HA/Input	% normalized
AP	1281.67	6500.97	0.197	100
Sema3F-AP	23033.3	23450	0.982	498
35th ABE_2 hrs	+HA-samples	Inputs	+HA/Input	% normalized
AP	18869.7	29302.4	0.64	100
Sema3F-AP	19511.3	15084.4	1.29	202
36th ABE(I)_2 hrs	+HA-samples	Inputs	+HA/Input	% normalized
AP	11889.4	11501.1	1.03	100
Sema3F-AP	19429.4	11721.8	1.66	161
Sema3A-AP	32063.8	15633.5	2.05	199
36th ABE(II)_2 hrs	+HA-samples	Inputs	+HA/Input	% normalized
AP	4862.32	11407.9	0.43	100
Sema3F-AP	16074.6	10975.5	1.46	340
Sema3A-AP	7294.7	22289.2	0.33	77
