# Supplementary material for: Palmitoylation regulates neuropilin-2 localization and function in cortical neurons and conveys specificity to semaphorin signaling via palmitoyl acyltransferases
Source: eLife. 2023 Apr 3;12:e83217. doi: 10.7554/eLife.83217 (PMC10069869; doi:10.7554/eLife.83217)
Supplement: Figure 5—source data 1. [file elife-83217-fig5-data1.xlsx]

## Sheet: Sheet1
Npn2 In Utero Electroporation (IUE) rescue_Cortex layer V_Cumulative data
Number of spines per μm (0-50 μm from cell body)
EGFP only	EGFP+Cre+LSL-tdTomato	Nrp-2WT-EGFP+Cre+LSL-tdTomato	Nrp-2TCS-EGFP+Cre+LSL-tdTomato
0.26	0.3	0.36	0.88
0.38	0.32	0.64	0.3
0.24	0.6	0.5	0.72
0.32	0.48	0.3	0.8
0.18	0.38	0.1	0.1
0.5	0.44	0.4	0.38
0.28	0.54	0.44	0.08
0.42	0.66	0.4	0.34
0.36	0.58	0.12	0.88
0.56	0.66	0.28	0.6
0.52	0.3	0.42	0.4
0.48	0.8	0.4	0.14
0.6	0.46	0.32	0.4
0.16	0.8	0.38	0.5
0.44	0.18	0.22	0.38
0.7	0.2	0.2	0.24
0.48	0.56	0.58	0.32
0.24	0.3	0.42	0.14
0.76	0.62	0.2	0.34
0.3	0.66	0.16	0.36
0.44	0.88	0.12	0.28
0.18	0.74	0.12	0.24
0.4	0.2	1.2	0.66
0.22	0.42	0.04	0.26
0.28	0.54	0.28	0.66
0.3	0.4	0.36	0.36
0.5	0.2	0.2	0.14
0.14	0.64	0.18	0.56
0.62	0.06	0.38	0.4
0.5	0.72	0.32	0.52
0.12	1.04	0.26	0.48
0.18	0.3	0.28	0.18
	0.18	0.04	0.2
	0.32	0.26	0.42
	0.26	0.22	0.82
	0.68	0.46	0.76
	1.26	0.34	0.64
		0.26	0.1
		0.28	0.32
		0.66	0.44
		0.32	0.4
		0.5	0.5
		0.24	0.52
		0.28	0.12
		0.1	0.5
		0.1	1.32
		0.26	0.72
		0.54	0.46
		0.4	0.48
		0.22	1.2
		0.1	1.36
		0.06	0.38
		0.24	0.8
			0.5
			0.4
			0.72
			0.3
			0.52
			0.14
			0.16
			0.2
			0.82
			0.7
			0.26
			0.72
			0.14
			0.94
			0.24
			0.08
			0.16
			0.14
			0.2
			0.28
			1.26
			0.68
			0.62
			0.44
			0.64
			0.7
			0.78
			0.26
			0.38
			1.34
			0.74
			1.08
			0.8
			1.02
			0.44
			0.04
			0.56
			0.6
			0.06
