# Supplementary material for: Palmitoylation regulates neuropilin-2 localization and function in cortical neurons and conveys specificity to semaphorin signaling via palmitoyl acyltransferases
Source: eLife. 2023 Apr 3;12:e83217. doi: 10.7554/eLife.83217 (PMC10069869; doi:10.7554/eLife.83217)
Supplement: Figure 6—figure supplement 1—source data 3. [file elife-83217-fig6-figsupp1-data3.xlsx]

## Sheet: Sheet1
49th ABE: NEUROPILIN-1
	HA	INPUT	HA/Input	Normalized to WT
WT BL6 (I)	43468.7	32765	1.33
WT BL6 (II)	37211.3	34761.2	1.07
WT BL6 (III)	13390.5	19740	0.68
WT BL6 (IV)	22146.2	4108.79	5.39
Average			2.1175	1
DHHC8KO(I)	44030.8	37062.6	1.19
DHHC8KO(II)	53445.3	24883.5	2.15
DHHC8KO(III)	13091.7	6449.9	2.03
DHHC8KO(IV)	32152.8	26840.9	1.2
Average			1.6425	0.78
Note: different selection rectangle for inputs and HA, but of course the same for all inputs or for all HA
49th ABE: NEUROPILIN-2
	HA	INPUT	HA/Input	Normalized to WT
WT BL6 (I)	51795.6	48185.7	1.07
WT BL6 (II)	52379.1	51009.7	1.03
WT BL6 (III)	33119.9	41619.7	0.8
WT BL6 (IV)	17365.2	7821.7	2.2
Average
DHHC8KO(I)	22373.4	10354.9	2.16
DHHC8KO(II)	20323	20790.7	0.98
DHHC8KO(III)	1468.58	2941.89	0.5
DHHC8KO(IV)	12945.2	21828.5	0.59
Average
	WT BL6	DHHC8KO
I	1	2.02
II	1	0.95
III	1	0.625
IV	1	0.27
	1	0.96625
