# Supplementary material for: Palmitoylation regulates neuropilin-2 localization and function in cortical neurons and conveys specificity to semaphorin signaling via palmitoyl acyltransferases
Source: eLife. 2023 Apr 3;12:e83217. doi: 10.7554/eLife.83217 (PMC10069869; doi:10.7554/eLife.83217)
Supplement: Figure 6—figure supplement 1—source data 4. [file elife-83217-fig6-figsupp1-data4.xlsx]

## Sheet: Sheet1
EK 4-1-15 DHHC8KO DIV21 CTX_Sema3F-AP tr._63x				10.078 pixels/μm
Image	# of spines	Segment: 0-50μm	spines/μm
1	46		0.92
2	22		0.44
3	42		0.84
4	39		0.78
5	48		0.96
6	21		0.42
7	23		0.46
8	19		0.38
9	48		0.96
10	36		0.72
11	38		0.76
12	29		0.58
13	16		0.32
14	33		0.66
15	39		0.78
16	28		0.56
17	28		0.56
18	41		0.82
19	34		0.68
20	34		0.68
21	33		0.66
22	27		0.54
23	31		0.62
24	31		0.62
25	37		0.74
26	32		0.64
27	27		0.54
28	21		0.42
29	52		1.04
30	25		0.5
31	31		0.62
32	37		0.74
33	21		0.42
34	26		0.52
35	38		0.76
36	32		0.64
37	56		1.12
38	17		0.34
39	39		0.78
40	12		0.24
41	23		0.46
42	37		0.74
43	46		0.92
44	43		0.86
45	43		0.86
46	20		0.4
47	27		0.54
48	31		0.62
49	13		0.26
50	35		0.7
51	20		0.4
52	27		0.54
53	14		0.28
54	14		0.28
55	28		0.56
56	15		0.3
57	15		0.3
58	14		0.28
59	39		0.78
60	28		0.56
61	19		0.38
62	12		0.24
Average	29.871		0.5974
EK 4-1-15 DHHC8KO DIV21 CTX_AP tr._63x				Scale: 10.078 pixels/μm
Image	# of spines	Segment: 0-50μm	spines/μm
1	42		0.84
2	42		0.84
3	35		0.7
4	39		0.78
5	38		0.76
6	26		0.52
7	25		0.5
8	48		0.96
9	42		0.84
10	34		0.68
11	35		0.7
12	46		0.92
13	40		0.8
14	50		1
15	34		0.68
16	29		0.58
17	35		0.7
18	44		0.88
19	20		0.4
20	48		0.96
21	34		0.68
22	31		0.62
23	39		0.78
24	34		0.68
25	60		1.2
26	38		0.76
27	60		1.2
28	41		0.82
29	58		1.16
30	56		1.12
31	33		0.66
32	28		0.56
33	35		0.7
34	21		0.42
35	38		0.76
36	38		0.76
37	43		0.86
38	28		0.56
39	30		0.6
40	47		0.94
41	20		0.4
42	57		1.14
43	30		0.6
44	24		0.48
45	27		0.54
46	22		0.44
47	34		0.68
48	29		0.58
49	21		0.42
50	22		0.44
51	30		0.6
52	36		0.72
53	53		1.06
54	40		0.8
55	28		0.56
56	46		0.92
Average	36.8393		0.736786
57	same as #5
EK 11-28-15 DHHC8KO DIV22 CTX_Sema3F-AP_63X_Spine analysis
Image	# of spines	0-50 μm	spines/μm	Scale: 10.078 pixels/μm
1	38	50	0.76
2	21	50	0.42
3	31	50	0.62
4	43	50	0.86
5	61	50	1.22
6	24	50	0.48
7	35	50	0.7
8	33	50	0.66
9	46	50	0.92
10	22	50	0.44
11	49	50	0.98
12	32	50	0.64
13	31	50	0.62
14	18	50	0.36
15	40	50	0.8
16	16	50	0.32
17	14	50	0.28
18	22	50	0.44
19	41	50	0.82
20	40	50	0.8
21	32	50	0.64
22	7	50	0.14
23	13	50	0.26
24	34	50	0.68
25	38	50	0.76
26	24	50	0.48
27	24	50	0.48
28	23	50	0.46
29	30	50	0.6
30	35	50	0.7
31	14	50	0.28
32	21	50	0.42
33	37	50	0.74
34	31	50	0.62
35	36	50	0.72
36	34	50	0.68
37	13	50	0.26
38	26	50	0.52
39	36	50	0.72
40	32	50	0.64
41	49	50	0.98
Average			0.607805
EK 11-28-15 DHHC8KO DIV22 CTX_AP_63X_Spine analysis
Image	# of spines	0-50 μm	spines/μm	Scale: 10.078 pixels/μm
1	26	50	0.52
2	27	50	0.54
3	16	50	0.32
4	31	50	0.62
5	32	50	0.64
6	68	50	1.36
7	48	50	0.96
8	70	50	1.4
9	30	50	0.6
10	40	50	0.8
11	37	50	0.74
12	40	50	0.8
13	62	50	1.24
14	38	50	0.76
15	80	50	1.6
16	55	50	1.1
17	32	50	0.64
18	30	50	0.6
19	27	50	0.54
20	74	50	1.48
21	42	50	0.84
22	7	50	0.14
23	23	50	0.46
24	28	50	0.56
25	36	50	0.72
26	29	50	0.58
27	32	50	0.64
28	26	50	0.52
29	18	50	0.36
30	37	50	0.74
31	29	50	0.58
32	38	50	0.76
33	40	50	0.8
34	46	50	0.92
35	38	50	0.76
36	28	50	0.56
37	11	50	0.22
38	67	50	1.34
39	15	50	0.3
40	35	50	0.7
41	27	50	0.54
42	39	50	0.78
44	33	50	0.66
43	rejected	50	rejected
