# Supplementary material for: Palmitoylation regulates neuropilin-2 localization and function in cortical neurons and conveys specificity to semaphorin signaling via palmitoyl acyltransferases
Source: eLife. 2023 Apr 3;12:e83217. doi: 10.7554/eLife.83217 (PMC10069869; doi:10.7554/eLife.83217)
Supplement: Figure 6—source data 5. [file elife-83217-fig6-data5.xlsx]

## Sheet: Sheet1
Npn2 palmitoylation
45th ABE
Tissue sample	+HA	Input	+HA/input	% normalization
WT BL6 DIV14	20045	29982.8	0.66855
WT BL6 DIV12 (I)	5824.46	6895.21	0.84471
WT BL6 DIV12 (II)	4003.32	11330.5	0.35332
Average WT			0.62219	100
DHHC15-/- (I)	3269.85	9865.28	0.33145
DHHC15-/- (II)	1495.62	6269.91	0.23854
DHHC15-/- (III)	1260.84	2833.47	0.44498
Average DHHC15-/-			0.33832	54
NEUROPILIN-2: blot used for quantification 8-19-15 51st ABE(III)
	HA	Input	HA/Input	Normalized
WT BL6 (I)	23968.5	9899.87	2.42
WT BL6 (II)	21052.6	9893.94	2.13
WT BL6 (III)	18350.8	10279.5	1.79
Average			2.11	1
DHHC15-/-(I)	33681.3	30425.2	1.11
DHHC15-/-(II)	26496.5	24689.1	1.07
DHHC15-/-(III)	31506	26005.2	1.21
Average			1.13	0.5355
EK 56th ABE_Dec. 2015
Neuropilin-2	Input	HA	HA/Input	Normalized
WT	27523.3	54407.2	1.97677	100
DHHC15-/-	31158.4	25366	0.814098	41
