# Supplementary material for: Palmitoylation regulates neuropilin-2 localization and function in cortical neurons and conveys specificity to semaphorin signaling via palmitoyl acyltransferases
Source: eLife. 2023 Apr 3;12:e83217. doi: 10.7554/eLife.83217 (PMC10069869; doi:10.7554/eLife.83217)
Supplement: Figure 6—source data 6. [file elife-83217-fig6-data6.xlsx]

## Sheet: Sheet1
Npn-1-45th ABE	+HA sample	Input	+HA/Input	Normalized %
WT BL6 DIV14	16926.6	19060.5	0.888
WT BL6 DIV12(I)	15192.8	5769.37	2.63
WT BL6 DIV12(II)	19199.4	11290.9	1.7
Average			1.74	100
DHHC15-/- (I)	12078	14207.8	0.85
DHHC15-/- (II)	8091.54	10571.2	0.77
DHHC15-/- (III)	11686.5	4563.81	2.56
Average			1.4	80
NEUROPILIN-1: blot used for quantification 8-19-15 51st ABE(III)
	HA	Input	HA/Input	Normalized
WT BL6 (I)	29747	6083.87	4.89
WT BL6 (II)	29550.7	5714.18	5.17
WT BL6 (III)	16676.7	6022.31	2.77
Average			4.28	1
DHHC15-/-(I)	42781.4	10119.2	4.23
DHHC15-/-(II)	41013.1	5595.01	7.33
DHHC15-/-(III)	41873.6	5826.38	7.19
Average			6.25	1.46
