# Supplementary material for: Palmitoylation regulates neuropilin-2 localization and function in cortical neurons and conveys specificity to semaphorin signaling via palmitoyl acyltransferases
Source: eLife. 2023 Apr 3;12:e83217. doi: 10.7554/eLife.83217 (PMC10069869; doi:10.7554/eLife.83217)
Supplement: Figure 6—source data 7. [file elife-83217-fig6-data7.xlsx]

## Sheet: Sheet1
Sema3F-AP	AP
0.84	0.64
0.66	1.04
0.82	0.44
0.54	0.7
0.56	0.68
0.62	1.16
0.62	0.54
0.64	0.4
0.66	1.24
0.64	0.9
0.32	0.96
0.48	0.6
0.72	0.94
0.5	0.38
0.44	0.86
0.48	0.58
0.86	0.82
0.44	0.58
0.32	0.56
0.44	0.58
0.64	0.96
0.68	0.4
0.56	0.58
0.7	0.8
0.38	0.36
0.8	0.84
0.64	0.6
0.6	0.46
0.78	0.48
0.96	0.78
0.68	0.64
0.66	1
0.74	1.02
0.64	0.74
1.14	0.34
0.9	0.76
1.3	1
0.32	1.2
0.6	0.5
0.5	0.94
0.72	0.68
0.86	0.64
0.7	0.62
0.78	0.88
0.72	1.44
0.54	0.66
0.72	0.84
0.8	1
0.44	1.02
0.58	1.46
0.52	0.84
0.52	0.6
0.32	0.4
0.54	0.84
0.68	0.72
0.3	0.58
0.74	0.74
0.96	0.36
0.68	0.26
0.58	0.9
0.9	0.56
0.64	0.42
0.7	0.72
0.3	0.6
0.98	0.36
0.3	0.94
0.4	0.48
0.98	0.3
0.56	0.66
0.42	0.74
0.98	0.66
0.64	0.38
0.52	0.9
0.4	0.4
0.68	0.68
1.06	1.1
0.8	0.46
0.36	0.94
	0.7
	1.16
	1.06
	0.8
	1.1
	0.94
	0.44
	0.66
	1
	0.72
	0.7
	1.32
	1.28
	0.84
	0.4
	1.04
	0.8
	0.6
	0.74
	0.94
	1.06
	0.98
	1.24
	0.56
	1.06
	1.08
	0.36
	0.88
	0.66
	0.5
	1.06
	1.7
	0.78
	0.44
	0.68
	1
	0.76
	0.76
	0.56
	0.7
	1.12
Sema3F-AP	AP
0.642821	0.76437		Average
0.207614	0.276542		STDEV
0.0235	0.02535		SEM
