# Supplementary material for: Palmitoylation regulates neuropilin-2 localization and function in cortical neurons and conveys specificity to semaphorin signaling via palmitoyl acyltransferases
Source: eLife. 2023 Apr 3;12:e83217. doi: 10.7554/eLife.83217 (PMC10069869; doi:10.7554/eLife.83217)
Supplement: Figure 6—source data 8. [file elife-83217-fig6-data8.xlsx]

## Sheet: Sheet1
DHHC15-/-	Sema3F-AP	AP
	0.56	0.4
	1.2	0.7
	0.7	0.76
	1.46	0.86
	0.92	0.38
	0.94	0.3
	1.02	0.98
	0.68	0.74
	0.64	0.94
	0.6	0.4
	0.5	0.96
	0.58	0.7
	0.96	0.74
	0.68	0.56
	0.64	0.36
	0.9	1.02
	0.96	0.8
	0.76	0.4
	0.8	0.68
	0.62	0.88
	0.84	0.54
	0.66	1.14
	0.66	0.82
	0.64	0.7
	1.2	0.48
	1	1.06
	0.38	0.4
	0.4	1.06
	0.32	0.4
	0.94	0.98
	0.94	0.84
	0.78	0.42
	0.54	1
	0.72	0.64
	0.66	0.84
	0.4	0.46
	0.5	0.5
	0.38	0.72
	0.72	1.6
	0.66	0.62
	0.96	1.02
	0.64	0.84
	0.58	1.12
	0.6	0.92
	0.42	1
	0.72	0.76
	0.56	1.04
	0.76	0.86
	0.72	0.86
	0.96	0.8
	0.84	0.8
	0.88	0.8
	1.1	1
	0.4	1
	0.88	0.74
	0.84	1.04
	0.82	1.02
	1.18	1
	0.64	0.52
	1.02	0.82
	0.68	0.7
	0.8	1.14
	0.46	0.68
	0.6	0.76
	1	0.5
	0.5	0.78
	1.16	0.8
	0.88	1.06
	0.64	1.4
	0.16	0.34
	0.72	0.5
	0.8	0.58
	0.74	1.04
	0.86	0.76
	0.84	0.84
	0.8	0.5
	0.44	0.48
	0.92	1.26
	1.14	0.52
	1	0.46
	0.84	0.38
	0.92	0.92
	0.92	0.8
	0.42	0.4
	1.16	0.56
	0.82	0.66
	0.6	0.86
	0.66	0.72
	0.84	0.76
	1.22	0.66
	0.24	0.42
	0.84	0.46
	0.62	0.66
	0.66	0.68
	1.1	0.44
	0.68	0.92
	0.8	0.68
	0.84	1.18
	0.46	0.56
	0.56	0.34
	0.8	0.88
	0.68	0.74
	0.44	0.36
	0.44	0.68
	0.64	0.6
	1.08	0.4
	0.48	0.7
	0.9	0.86
	0.58	0.48
	0.36	0.36
	0.82	0.52
	0.56	0.56
	0.74	0.52
	0.52	0.74
	0.48	0.5
	0.28	0.6
	0.66	0.46
	0.7	0.46
	0.48	0.54
	0.38	0.74
	0.46	0.72
	0.46	0.84
	0.8	0.52
	0.28	1.1
	1.34	0.76
	0.44	0.78
	0.24	0.62
	0.58	0.44
	0.38	0.42
	0.48	0.34
	1.02	0.26
	0.6	0.6
	0.62	0.3
	0.46	0.24
	0.22	0.24
	0.82	0.14
	0.7	0.24
	0.76	0.64
	0.48	0.18
	0.6	0.14
	1.3	0.9
	0.64	0.66
	0.56	0.84
	0.16	0.52
		0.36
		0.58
		0.46
