# Supplementary material for: Palmitoylation regulates neuropilin-2 localization and function in cortical neurons and conveys specificity to semaphorin signaling via palmitoyl acyltransferases
Source: eLife. 2023 Apr 3;12:e83217. doi: 10.7554/eLife.83217 (PMC10069869; doi:10.7554/eLife.83217)
Supplement: Figure 6—source data 9. [file elife-83217-fig6-data9.xlsx]

## Sheet: Sheet1
WT BL6 CTX:Sema3A-AP treatment: cumulative Sholl analysis of EK 9-10-14 & 10-8-14												WT BL6 CTX:AP treatment:cumulative Sholl analysis of EK 9-10-14 & 10-8-14
Distance from the cell body (μm)	0	10	20	30	40	50	60	70	80	90	100	0	10	20	30	40	50	60	70	80	90	100
	0	9	6	3	2	1	0	0	0	0	0	0	4	5	4	3	1	1	1	0	0	0
	0	3	4	5	2	1	0	0	0	0	0	0	6	8	3	2	5	3	2	2	5	1
	0	10	9	4	2	2	1	1	1	1	0	0	7	7	6	2	3	2	0	0	0	0
	0	5	12	13	9	9	6	5	4	2	2	0	4	3	1	1	1	1	1	1	2	1
	0	3	6	2	2	2	0	0	0	0	0	0	11	9	9	5	3	3	3	2	0	0
	0	7	7	9	8	6	3	3	2	1	2	0	7	10	5	4	3	3	2	2	0	0
	0	6	8	10	7	6	6	5	1	0	0	0	3	7	5	4	2	0	0	0	0	0
	0	5	6	3	1	1	1	1	3	2	2	0	5	4	2	2	2	0	0	0	0	0
	0	5	7	6	5	4	4	4	1	1	1	0	5	4	4	3	2	1	1	0	0	0
	0	7	9	6	4	3	1	1	1	1	0	0	4	2	2	1	1	2	2	2	1	0
	0	6	2	2	1	0	0	0	0	0	0	0	5	5	3	5	3	1	1	1	0	0
	0	3	5	5	3	2	0	0	0	0	0	0	5	4	2	2	3	2	2	1	0	0
	0	3	2	5	5	3	3	3	3	2	1	0	5	3	2	2	3	3	2	0	0	0
	0	4	3	3	2	2	2	2	2	1	0	0	7	6	3	2	3	3	3	1	0	0
	0	5	11	4	1	4	1	1	1	0	0	0	3	2	2	2	2	2	2	1	0	0
	0	8	10	6	4	2	2	2	2	1	0	0	4	4	5	5	7	3	2	1	0	0
	0	7	4	3	4	3	3	2	1	1	1	0	4	2	1	1	1	1	0	0	0	0
	0	6	5	3	1	1	1	2	0	0	0	0	4	9	9	7	4	3	2	1	1	0
	0	7	10	5	5	4	3	2	0	0	0	0	6	7	3	1	1	1	1	2	0	0
	0	5	6	4	3	2	2	3	2	0	0	0	6	4	4	4	3	2	0	0	0	0
	0	5	5	4	6	4	3	2	1	0	0	0	4	5	3	1	1	1	1	1	1	1
	0	7	2	3	2	2	2	2	3	1	0	0	3	8	5	3	1	0	0	0	0	0
	0	6	4	3	3	2	2	2	1	0	0	0	8	10	8	5	3	0	0	0	0	0
	0	7	8	5	2	2	3	3	0	0	0	0	3	1	2	1	1	1	1	1	1	1
	0	3	5	5	2	1	2	0	0	0	0	0	3	1	1	2	2	2	2	0	0	0
	0	6	7	4	2	2	3	1	1	0	0	0	4	4	1	0	0	0	0	0	0	0
	0	6	8	4	2	2	0	0	0	0	0	0	11	10	4	1	1	1	1	2	0	0
	0	6	7	4	3	1	2	1	0	0	0	0	7	6	1	1	2	2	2	0	0	0
	0	8	9	6	8	4	2	1	1	0	0	0	6	6	1	1	1	2	0	0	0	0
	0	7	7	7	4	3	3	1	1	0	0	0	5	2	1	1	1	1	2	0	0	0
	0	4	9	5	2	2	2	1	0	0	0	0	5	4	3	2	1	1	1	1	0	0
	0	4	8	6	6	1	1	1	2	1	0	0	4	2	2	2	2	1	1	1	1	0
	0	6	12	10	6	5	5	1	2	0	0	0	5	7	4	2	2	1	1	1	1	1
	0	6	11	7	3	2	1	1	3	0	0	0	4	8	6	6	1	1	1	2	1	0
	0	6	6	2	2	1	0	0	0	0	0	0	6	12	10	6	5	5	1	2	0	0
	0	5	8	12	7	3	1	0	0	0	0	0	6	11	7	3	2	1	1	3	0	0
	0	7	12	13	11	5	2	1	1	0	0	0	6	6	2	2	1	0	0	0	0	0
	0	8	7	8	4	3	4	2	2	1	0	0	5	8	12	7	3	1	0	0	0	0
	0	8	10	6	4	4	2	3	2	0	0	0	7	12	13	11	5	2	1	1	0	0
	0	4	3	3	4	1	3	2	1	0	0	0	8	7	8	4	3	4	2	2	1	0
	0	6	10	11	9	6	4	0	0	0	0	0	8	10	6	4	4	2	3	2	0	0
	0	8	10	9	7	3	1	1	0	0	0	0	4	3	3	4	1	3	2	1	0	0
	0	15	9	2	2	1	0	0	0	0	0	0	6	10	11	9	6	4	0	0	0	0
	0	5	13	6	6	8	8	3	2	0	0	0	8	10	9	7	3	1	1	0	0	0
	0	8	11	7	5	4	3	2	2	0	0	0	15	9	2	2	1	0	0	0	0	0
	0	9	8	6	3	2	2	1	1	1	0	0	5	13	6	6	8	8	3	2	0	0
	0	5	9	9	5	5	7	6	8	3	1	0	8	11	7	5	4	3	2	2	0	0
	0	5	7	8	4	5	3	1	2	2	0	0	9	8	6	3	2	2	1	1	1	0
	0	4	5	6	6	5	6	3	3	2	0	0	5	9	9	5	5	7	6	8	3	1
	0	6	7	5	5	5	4	2	2	1	0	0	5	7	8	4	5	3	1	2	2	0
	0	10	11	7	6	7	5	3	4	1	2	0	4	5	6	6	5	6	3	3	2	0
	0	7	7	5	6	3	1	0	0	0	0	0	6	7	5	5	5	4	2	2	1	0
	0	5	5	3	3	1	1	5	0	0	0	0	10	11	7	6	7	5	3	4	1	2
	0	4	5	8	10	5	2	1	0	0	0	0	7	7	5	6	3	1	0	0	0	0
	0	3	3	8	8	4	3	1	1	0	0	0	5	5	3	3	1	1	5	0	0	0
	0	2	5	4	7	6	5	2	2	1	1	0	4	5	8	10	5	2	1	0	0	0
	0	9	13	10	7	5	1	0	0	0	0	0	3	3	8	8	4	3	1	1	0	0
	0	12	10	5	2	3	2	2	2	2	2	0	2	5	4	7	6	5	2	2	1	1
	0	3	9	8	6	2	3	4	5	1	0	0	9	13	10	7	5	1	0	0	0	0
	0	2	4	4	2	1	2	1	0	0	0	0	12	10	5	2	3	2	2	2	2	2
	0	6	7	6	1	2	0	0	0	0	0	0	3	9	8	6	2	3	4	5	1	0
	0	9	9	10	4	1	1	0	0	0	0	0	2	4	4	2	1	2	1	0	0	0
	0	3	2	2	2	2	1	2	1	0	0	0	6	7	6	1	2	0	0	0	0	0
	0	7	6	4	4	3	0	0	0	0	0	0	9	9	10	4	1	1	0	0	0	0
	0	12	13	4	5	2	2	2	2	1	1	0	3	2	2	2	2	1	2	1	0	0
	0	6	8	5	5	8	5	6	3	3	0	0	7	6	4	4	3	0	0	0	0	0
	0	6	11	4	4	2	2	3	1	1	0	0	12	13	4	5	2	2	2	2	1	1
	0	9	8	12	8	2	2	1	0	0	0	0	6	8	5	5	8	5	6	3	3	0
	0	9	8	6	2	3	2	1	1	1	0	0	6	11	4	4	2	2	3	1	1	0
	0	8	9	5	5	5	4	3	2	0	0	0	9	8	12	8	2	2	1	0	0	0
	0	6	9	9	7	8	6	2	0	0	0	0	9	8	6	2	3	2	1	1	1	0
	0	3	2	3	2	1	1	1	0	0	0	0	8	9	5	5	5	4	3	2	0	0
												0	6	9	9	7	8	6	2	0	0	0
												0	3	2	3	2	1	1	1	0	0	0
Average	0	6.18056	7.40278	5.81944	4.33333	3.16667	2.375	1.68056	1.23611	0.5	0.222222	0	5.93243	6.77027	5.12162	3.85135	2.91892	2.13514	1.47297	1.09459	0.472973	0.162162
WT BL6 CTX:Sema3A-AP treatment: cumulative Sholl analysis of EK 9-10-14 & 10-8-14												WT BL6 CTX:AP treatment:cumulative Sholl analysis of EK 9-10-14 & 10-8-14
Distance from the cell body (μm)	0	10	20	30	40	50	60	70	80	90	100	0	10	20	30	40	50	60	70	80	90	100
	0	9	6	3	2	1	0	0	0	0	0	0	4	5	4	3	1	1	1	0	0	0
	0	3	4	5	2	1	0	0	0	0	0	0	6	8	3	2	5	3	2	2	5	1
	0	10	9	4	2	2	1	1	1	1	0	0	7	7	6	2	3	2	0	0	0	0
	0	5	12	13	9	9	6	5	4	2	2	0	4	3	1	1	1	1	1	1	2	1
	0	3	6	2	2	2	0	0	0	0	0	0	11	9	9	5	3	3	3	2	0	0
	0	7	7	9	8	6	3	3	2	1	2	0	7	10	5	4	3	3	2	2	0	0
	0	6	8	10	7	6	6	5	1	0	0	0	3	7	5	4	2	0	0	0	0	0
	0	5	6	3	1	1	1	1	3	2	2	0	5	4	2	2	2	0	0	0	0	0
	0	5	7	6	5	4	4	4	1	1	1	0	5	4	4	3	2	1	1	0	0	0
	0	7	9	6	4	3	1	1	1	1	0	0	4	2	2	1	1	2	2	2	1	0
	0	6	2	2	1	0	0	0	0	0	0	0	5	5	3	5	3	1	1	1	0	0
	0	3	5	5	3	2	0	0	0	0	0	0	5	4	2	2	3	2	2	1	0	0
	0	3	2	5	5	3	3	3	3	2	1	0	5	3	2	2	3	3	2	0	0	0
	0	4	3	3	2	2	2	2	2	1	0	0	7	6	3	2	3	3	3	1	0	0
	0	5	11	4	1	4	1	1	1	0	0	0	3	2	2	2	2	2	2	1	0	0
	0	8	10	6	4	2	2	2	2	1	0	0	4	4	5	5	7	3	2	1	0	0
	0	7	4	3	4	3	3	2	1	1	1	0	4	2	1	1	1	1	0	0	0	0
	0	6	5	3	1	1	1	2	0	0	0	0	4	9	9	7	4	3	2	1	1	0
	0	7	10	5	5	4	3	2	0	0	0	0	6	7	3	1	1	1	1	2	0	0
	0	5	6	4	3	2	2	3	2	0	0	0	6	4	4	4	3	2	0	0	0	0
	0	5	5	4	6	4	3	2	1	0	0	0	4	5	3	1	1	1	1	1	1	1
	0	7	2	3	2	2	2	2	3	1	0	0	3	8	5	3	1	0	0	0	0	0
	0	6	4	3	3	2	2	2	1	0	0	0	8	10	8	5	3	0	0	0	0	0
	0	7	8	5	2	2	3	3	0	0	0	0	3	1	2	1	1	1	1	1	1	1
	0	3	5	5	2	1	2	0	0	0	0	0	3	1	1	2	2	2	2	0	0	0
	0	6	7	4	2	2	3	1	1	0	0	0	4	4	1	0	0	0	0	0	0	0
	0	6	8	4	2	2	0	0	0	0	0	0	11	10	4	1	1	1	1	2	0	0
	0	6	7	4	3	1	2	1	0	0	0	0	7	6	1	1	2	2	2	0	0	0
	0	8	9	6	8	4	2	1	1	0	0	0	6	6	1	1	1	2	0	0	0	0
	0	7	7	7	4	3	3	1	1	0	0	0	5	2	1	1	1	1	2	0	0	0
	0	4	9	5	2	2	2	1	0	0	0	0	5	4	3	2	1	1	1	1	0	0
	0	4	8	6	6	1	1	1	2	1	0	0	4	2	2	2	2	1	1	1	1	0
	0	6	12	10	6	5	5	1	2	0	0	0	5	7	4	2	2	1	1	1	1	1
	0	6	11	7	3	2	1	1	3	0	0	0	11	11	7	4	0	0	0	0	0	0	start of 10-8-14: newer anaysis compared to previous cumulative analysis
	0	6	6	2	2	1	0	0	0	0	0	0	9	13	10	8	7	7	8	7	3	1
	0	5	8	12	7	3	1	0	0	0	0	0	5	2	1	2	4	2	1	0	0	0
	0	7	12	13	11	5	2	1	1	0	0	0	8	7	5	7	4	4	3	3	2	0
	0	8	7	8	4	3	4	2	2	1	0	0	7	11	9	6	6	3	4	3	3	2
	0	8	10	6	4	4	2	3	2	0	0	0	4	7	5	5	4	3	2	1	0	0
	0	4	3	3	4	1	3	2	1	0	0	0	2	4	11	6	3	2	1	0	0	0
	0	6	10	11	9	6	4	0	0	0	0	0	8	7	6	9	4	2	1	0	0	0
	0	8	10	9	7	3	1	1	0	0	0	0	4	6	6	2	2	2	3	2	1	1
	0	15	9	2	2	1	0	0	0	0	0	0	7	6	3	1	1	2	3	4	4	0
	0	5	13	6	6	8	8	3	2	0	0	0	5	4	5	3	4	5	3	1	0	0
	0	8	11	7	5	4	3	2	2	0	0	0	5	7	9	3	4	4	1	0	0	0
	0	9	8	6	3	2	2	1	1	1	0	0	5	2	2	3	2	2	1	1	0	0
	0	5	9	9	5	5	7	6	8	3	1	0	2	2	3	3	1	2	1	0	0	0
	0	5	7	8	4	5	3	1	2	2	0	0	4	4	6	2	4	1	2	1	0	0
	0	4	5	6	6	5	6	3	3	2	0	0	5	2	2	1	1	2	0	0	0	0
	0	6	7	5	5	5	4	2	2	1	0	0	5	7	5	4	5	6	2	0	0	0
	0	10	11	7	6	7	5	3	4	1	2	0	4	5	7	9	7	2	4	1	0	0
	0	7	7	5	6	3	1	0	0	0	0	0	9	9	7	6	5	5	5	7	5	4
	0	5	5	3	3	1	1	5	0	0	0	0	4	5	4	3	4	3	3	1	0	0
	0	4	5	8	10	5	2	1	0	0	0	0	5	5	2	1	1	1	1	0	0	0
	0	3	3	8	8	4	3	1	1	0	0	0	7	10	5	3	2	2	2	2	1	0
	0	2	5	4	7	6	5	2	2	1	1	0	5	9	6	6	6	7	5	3	2	0
	0	9	13	10	7	5	1	0	0	0	0	0	12	8	8	4	5	4	4	2	0	0
	0	12	10	5	2	3	2	2	2	2	2	0	3	2	2	4	4	3	2	3	3	1
	0	3	9	8	6	2	3	4	5	1	0	0	5	9	3	3	4	5	4	3	1	2
	0	2	4	4	2	1	2	1	0	0	0	0	8	7	4	7	4	4	4	3	2	1
	0	6	7	6	1	2	0	0	0	0	0	0	8	6	3	1	1	2	3	2	2	0
	0	9	9	10	4	1	1	0	0	0	0	0	8	2	2	1	1	1	2	2	0	0
	0	3	2	2	2	2	1	2	1	0	0	0	5.59677	5.64516	4.17742	3.17742	2.75806	2.22581	1.83871	1.22581	0.677419	0.274194
	0	7	6	4	4	3	0	0	0	0	0
	0	12	13	4	5	2	2	2	2	1	1
	0	6	8	5	5	8	5	6	3	3	0
	0	6	11	4	4	2	2	3	1	1	0
	0	9	8	12	8	2	2	1	0	0	0
	0	9	8	6	2	3	2	1	1	1	0
	0	8	9	5	5	5	4	3	2	0	0
	0	6	9	9	7	8	6	2	0	0	0
	0	3	2	3	2	1	1	1	0	0	0
Average	0	6.18056	7.40278	5.81944	4.33333	3.16667	2.375	1.68056	1.23611	0.5	0.222222
Cumulative: 9-10-14 and 10-8-14
	0	10	20	30	40	50	60	70	80	90	100
Sema3A-AP	0	6.18056	7.40278	5.81944	4.33333	3.16667	2.375	1.68056	1.23611	0.5	0.222222
AP	0	5.59677	5.64516	4.17742	3.17742	2.75806	2.22581	1.83871	1.22581	0.677419	0.274194
