# Supplementary material for: Palmitoylation regulates neuropilin-2 localization and function in cortical neurons and conveys specificity to semaphorin signaling via palmitoyl acyltransferases
Source: eLife. 2023 Apr 3;12:e83217. doi: 10.7554/eLife.83217 (PMC10069869; doi:10.7554/eLife.83217)
Supplement: Figure 6—source data 10. [file elife-83217-fig6-data10.xlsx]

## Sheet: Sheet1
Cumulative 9-15-14_7-21-15_9-8-15_DIV12 DHHC15-/- CORTEX_Sema3A-AP tr._40Xoil_Sholl analysis
Distance	0	10	20	30	40	50	60	70	80	90	100
Image
2014-09-15	0	7	5	2	2	1	1	1	1	1	2
	0	8	1	1	1	1	1	1	1	0	0
	0	8	7	3	3	4	3	1	0	0	0
	0	5	1	2	1	1	1	1	1	1	1
	0	3	3	1	2	1	1	0	0	0	0
	0	8	4	4	2	1	1	1	2	0	0
	0	6	3	1	1	1	1	1	1	0	0
	0	8	4	1	1	1	1	1	1	1	0
	0	7	8	6	9	4	5	3	4	3	0
	0	14	8	4	4	6	5	3	2	1	1
	0	6	2	2	3	1	1	1	1	1	0
	0	7	8	4	3	3	5	3	2	1	1
	0	7	12	4	1	1	1	1	1	0	0
	0	7	5	4	2	2	2	2	1	0	0
	0	6	5	5	4	2	1	1	1	1	0
	0	8	11	5	3	1	0	0	0	0	0
	0	5	1	1	4	3	3	1	1	4	0
	0	5	7	5	1	1	1	0	0	0	0
	0	7	9	3	1	1	0	0	0	0	0
2015-07-21	0	2	1	2	4	3	2	3	0	0	0
	0	4	4	3	1	2	1	1	1	1	2
	0	2	5	4	4	4	4	1	1	1	0
	0	13	11	6	6	3	2	1	1	1	1
	0	6	6	2	2	2	4	4	5	2	1
	0	10	7	2	2	3	3	0	0	0	0
	0	8	14	15	6	5	4	2	1	0	0
	0	5	5	5	4	5	3	2	4	2	0
2015-09-08	0	4	5	7	6	4	0	0	0	0	0
	0	5	7	5	6	3	3	4	3	3	0
	0	7	4	3	1	2	1	2	1	0	0
	0	5	8	9	5	5	2	3	4	0	0
	0	7	10	6	5	4	4	4	2	1	1
	0	8	10	8	9	8	9	9	6	1	0
	0	3	17	11	9	1	2	1	1	0	0
	0	3	4	2	2	1	4	1	1	1	0
	0	6	10	4	3	3	2	2	3	5	1
	0	8	10	15	9	8	5	3	7	4	2
	0	3	6	3	4	3	2	2	3	2	2
	0	3	3	2	2	2	1	1	2	1	1
	0	6	14	6	7	4	3	2	2	1	2
	0	6	9	9	7	8	10	9	6	2	1
	0	4	3	5	4	5	3	3	3	2	2
	0	4	3	1	2	2	1	1	1	1	1
	0	7	11	9	6	4	5	3	4	1	2
	0	3	7	5	4	2	2	2	2	0	0
	0	8	8	1	1	1	1	1	2	2	3
	0	9	3	2	2	1	2	2	1	2	0
	0	4	6	5	2	1	1	1	1	1	1
	0	7	8	9	10	4	4	6	5	1	0
	0	4	4	4	5	4	5	5	2	1	0
	0	13	13	8	4	2	3	3	2	4	3
	0	3	2	2	1	1	1	1	1	1	0
	0	5	6	6	6	3	2	1	1	1	1
	0	7	5	4	2	1	1	1	4	5	5
	0	3	5	3	3	2	1	1	2	2	1
	0	9	12	14	11	8	7	2	1	0	0
	0	3	6	5	2	2	1	2	1	1	0
	0	6	3	6	5	4	4	3	1	1	1
	0	6	6	6	4	3	4	3	8	5	3
	0	8	7	4	2	2	3	3	3	0	0
	0	8	14	10	8	6	8	4	4	1	1
	0	9	12	6	4	3	3	3	2	1	2
	0	7	6	4	4	2	2	3	1	1	0
	0	10	12	5	3	1	1	1	1	1	1
	0	7	7	5	7	3	3	2	2	2	1
	0	6	6	2	2	2	1	2	3	2	1
	0	10	16	11	6	7	8	6	4	2	0
	0	4	7	2	1	1	1	1	1	1	0
	0	6	8	8	9	4	4	3	3	5	0
	0	3	3	3	3	7	6	4	4	3	2
	0	4	3	1	1	1	1	1	1	1	1
	0	4	8	10	7	6	4	3	1	0	0
	0	6	9	10	13	9	8	5	3	2	1
	0	10	9	10	6	4	2	3	2	1	1
	0	2	4	3	3	3	3	3	2	4	4
	0	7	3	3	4	2	1	1	3	4	4
	0	12	16	9	5	4	2	3	2	3	4
Average	0	6.28571	6.94805	5.03896	4.07792	3.06494	2.77922	2.22078	2.05195	1.38961	0.844156
Cumulative 9-15-14_7-21-15_9-8-15_DIV12 DHHC15-/- CORTEX_AP tr._40Xoil_ Sholl analysis
Distance	0	10	20	30	40	50	60	70	80	90	100
Image
2014-09-15	0	13	9	5	4	3	3	3	2	1	0
	0	8	5	2	1	1	0	0	0	0	0
	0	6	6	3	1	1	1	1	1	1	1
	0	3	7	4	3	0	0	0	0	0	0
	0	4	7	4	6	3	5	4	6	1	0
	0	7	4	2	2	1	1	1	0	0	0
	0	7	4	2	1	3	2	2	1	0	0
	0	4	2	1	1	1	0	0	0	0	0
	0	3	2	1	1	2	1	1	1	0	0
	0	2	3	3	1	1	1	1	0	0	0
	0	5	2	2	3	2	3	2	2	1	1
	0	4	2	1	1	1	1	1	1	1	0
	0	2	1	2	1	1	1	1	1	0	0
	0	4	5	4	2	2	2	2	1	0	0
	0	1	1	1	1	3	2	2	2	1	1
	0	6	4	3	2	2	2	3	2	0	0
	0	3	2	1	1	2	2	2	1	2	0
	0	5	7	5	3	3	2	2	1	0	0
	0	6	2	1	1	1	1	1	1	1	0
	0	7	4	2	1	1	1	1	1	0	0
	0	2	2	1	1	1	1	1	1	1	1
	0	8	5	5	2	1	1	1	1	1	1
	0	6	8	5	3	2	1	1	1	1	0
2015-07-21	0	3	4	4	3	2	4	3	4	2	2
	0	6	10	3	2	2	1	2	4	1	2
	0	5	5	5	3	2	3	6	5	3	1
	0	5	5	2	1	1	1	1	1	1	1
	0	5	7	7	4	5	6	4	2	1	0
	0	5	5	2	2	1	1	1	1	2	2
	0	8	8	2	2	1	1	1	1	1	1
	0	7	7	4	4	2	2	3	3	3	4
	0	4	3	3	4	4	3	2	2	1	1
	0	5	9	8	9	7	6	3	2	0	0
	0	6	4	4	3	2	3	2	1	0	0
	0	3	2	1	2	2	4	2	2	1	0
	0	7	6	6	4	4	4	4	4	2	0
	0	6	4	4	2	1	1	1	1	1	1
	0	3	3	1	1	1	1	1	1	1	1
2015-09-08	0	4	1	1	3	3	1	1	1	1	1
	0	10	12	5	5	3	1	1	1	2	0
	0	7	4	4	3	2	2	2	1	1	1
	0	8	16	16	13	9	9	12	11	5	2
	0	15	14	5	4	4	1	0	0	0	0
	0	6	10	9	8	9	1	5	5	0	0
	0	5	3	1	1	1	1	0	0	0	0
	0	9	7	4	4	5	6	5	5	2	1
	0	7	3	3	2	3	2	1	2	2	2
	0	4	8	8	6	2	3	4	4	2	0
	0	5	5	7	9	4	2	2	1	0	0
	0	2	2	4	2	3	3	2	2	2	2
	0	2	4	5	6	4	4	2	0	0	0
	0	7	6	4	4	2	2	2	1	0	0
	0	7	8	5	1	2	3	1	1	1	1
	0	6	4	3	2	2	3	3	2	1	0
	0	4	5	2	3	5	3	2	1	0	0
	0	6	4	3	5	8	6	6	3	3	1
	0	5	4	5	7	12	8	6	7	1	2
	0	4	3	3	4	2	1	1	1	2	1
	0	9	4	1	1	1	1	0	0	0	0
	0	4	11	10	4	3	5	3	1	1	0
	0	5	4	2	2	3	0	0	0	0	0
	0	12	6	2	3	2	2	2	1	0	0
	0	2	5	5	6	4	4	3	3	1	1
	0	4	3	2	1	2	1	2	0	0	0
	0	5	2	2	2	2	1	0	0	0	0
	0	3	6	8	4	4	3	2	1	0	0
	0	2	3	2	2	1	1	1	1	0	0
	0	6	4	2	3	1	1	1	1	1	2
	0	3	3	5	7	4	2	2	1	0	0
	0	6	3	1	2	2	1	1	1	0	0
	0	6	10	10	6	4	3	3	3	1	0
	0	4	8	7	4	2	2	2	2	3	2
	0	6	6	5	4	5	4	4	2	2	1
	0	8	7	4	1	1	1	1	1	1	1
	0	3	5	3	2	2	2	2	4	5	5
	0	2	2	2	2	2	3	2	0	0	0
	0	4	5	3	2	2	2	2	1	2	0
	0	7	5	2	1	1	1	1	1	2	1
	0	2	6	5	5	6	5	0	0	0	0
	0	5	4	5	4	5	8	2	3	2	1
	0	8	9	7	11	4	3	2	1	1	2
	0	4	4	7	3	2	1	1	0	0	0
	0	3	2	4	4	4	5	6	3	3	1
	0	6	6	7	14	5	4	2	1	1	0
	0	5	8	7	3	3	3	2	3	1	0
	0	10	8	6	1	1	1	2	0	0	0
	0	3	4	3	4	3	2	1	0	0	0
	0	13	11	9	3	2	1	4	2	1	0
	0	2	2	2	2	1	1	2	2	0	0
	0	7	15	12	9	4	1	1	2	2	2
	0	1	1	1	3	2	1	1	1	1	0
	0	3	4	4	4	5	5	5	4	4	4
	0	6	7	6	6	6	5	3	0	0	0
	0	10	8	4	3	2	2	2	1	1	0
	0	4	3	1	1	1	2	2	1	1	0
	0	5	5	7	6	6	4	3	3	1	0
	0	8	11	9	8	4	3	3	3	2	1
	0	4	10	11	15	9	9	3	1	0	0
	0	6	11	6	5	1	1	2	1	1	0
	0	5	5	5	4	3	3	2	3	1	0
	0	6	3	3	3	3	5	5	3	2	1
	0	7	8	4	3	2	3	3	3	3	1
	0	6	6	4	2	1	2	1	3	0	0
	0	6	5	3	3	4	4	3	2	0	0
	0	10	2	1	1	1	1	1	1	1	0
	0	10	6	2	2	1	1	1	0	0	0
	0	6	5	5	2	1	1	2	2	0	0
	0	6	5	4	3	6	3	1	1	0	0
	0	6	8	8	7	3	3	2	2	0	0
	0	8	5	3	4	2	2	3	2	2	0
Average	0	5.53636	5.43636	4.14545	3.52727	2.82727	2.47273	2.12727	1.70909	0.972727	0.554545
Cumulative 9-15-14_7-21-15_9-8-15_DIV12 DHHC15-/- CORTEX_AP tr._40Xoil_ Sholl analysis
Distance	0	10	20	30	40	50	60	70	80	90	100
Average
Sema 3A-AP	0	6.28571	6.94805	5.03896	4.07792	3.06494	2.77922	2.22078	2.05195	1.38961	0.844156
AP	0	5.53636	5.43636	4.14545	3.52727	2.82727	2.47273	2.12727	1.70909	0.972727	0.554545
												P(20μm)	0.00449487
												P(30μm)	0.0552055
