# Supplementary material for: Palmitoylation regulates neuropilin-2 localization and function in cortical neurons and conveys specificity to semaphorin signaling via palmitoyl acyltransferases
Source: eLife. 2023 Apr 3;12:e83217. doi: 10.7554/eLife.83217 (PMC10069869; doi:10.7554/eLife.83217)
Supplement: Figure 7—figure supplement 1—source data 1. [file elife-83217-fig7-figsupp1-data1.xlsx]

## Sheet: Sheet1
EK 11-17-14 Golgi_WT C57BL/6_deep cer. cortex_spines_63X (LSM Inv.)
Image	# of spines	segment:0-50μm	spines/μm	Scale: 10.078 pixels/μm
1	17	50	0.34
2	12	50	0.24
3	9	50	0.18
4	rejected		rejected
5	13	50	0.26
6	13	50	0.26
7	rejected	50	rejected
8	12	50	0.24
9	3	50	0.06
10	15	50	0.3
11	5	50	0.1
12	rejected	50	rejected
13	21	50	0.42
14	17	50	0.34
15	13	50	0.26
16	5	50	0.1
17	rejected	50	rejected
18	7	50	0.14
19	3	50	0.06
20	7	50	0.14
21	10	50	0.2
22	11	50	0.22
23	19	50	0.38
24	7	50	0.14
25	4	50	0.08
EK 11-17-14 Golgi_DHHC15-/- deep cortex_spines_63X (LSM Inv.)
Image	# of spines	segment:0-50μm	spines/μm	Scale: 10.078 pixels/μm
1	6	50	0.12
2	16	50	0.32
3	13	50	0.26
4	4	50	0.08
5	rejected	50	rejected
6	28	50	0.56
7	20	50	0.4
8	rejected	50	rejected
9	rejected	50	rejected
10	6	50	0.12
11	5	50	0.1
12	3	50	0.06
13	7	50	0.14
14	17	50	0.34
15	10	50	0.2
16	14	50	0.28
17	18	50	0.36
18	8	50	0.16
19	14	50	0.28
20	10	50	0.2
21	11	50	0.22
22	rejected	50	rejected
23	13	50	0.26
EK 1-6-15 Golgi staining_cortex layer V_63x_code 2
Image	# of spines	Dendritic segment:0-50μm	# of spines/μm	Scale: 10.078pixels/μm
1	14	50	0.28
2	rejected	50	rejected
3	rejected	50	rejected
4	rejected	50	rejected
5	10	50	0.2
6	11	50	0.22
7	5	50	0.1
8	14	50	0.28
9	12	50	0.24
10	8	50	0.16
11	6	50	0.12
12	5	50	0.1
13	9	50	0.18
14	10	50	0.2
15	18	50	0.36
16	17	50	0.34
17	10	50	0.2
18	rejected	50	rejected
19	11		0.22
20	6		0.12
EK 1-6-15 Golgi staining_cortex layer V_63x_code 5
Image	# of spines	Dendritic segment:0-50μm	# of spines/μm	Scale: 10.078pixels/μm
1	16	50	0.32
2	16	50	0.32
3	6	50	0.12
4	17	50	0.34
5	16	50	0.32
6	15	50	0.3
7	7	50	0.14
8	17	50	0.34
9	11	50	0.22
10	12	50	0.24
11	11	50	0.22
12	10	50	0.2
13	17	50	0.34
14	12	50	0.24
15	14	50	0.28
16	11	50	0.22
17	23	50	0.46
18	11	50	0.22
19	23	50	0.46
20	10	50	0.2
21	14	50	0.28
22	17	50	0.34
23	18	50	0.36
24	11	50	0.22
25	5	50	0.1
26	2	50	0.04
27	4	50	0.08
Decoding: Code 2: WT C57BL6, Code 5: DHHC15KO, Codes 4 & 6: DHHC8KO
EK 6-26-15 Golgi stain_P45 DHHC15-/-#2438_cortex layer V_63X_spine analysis/ Scale: 10.078 pixels/μm
Image	# of spines	segment:0-50μm from soma	spines/μm
1	23	50	0.46
2	16	50	0.32
3	12	50	0.24	same with neuron#7
4	20	50	0.4
5	21	50	0.42
6	10	50	0.2
8	21	50	0.42
9	22	50	0.44
10	15	50	0.3
11	13	50	0.26
12	14	50	0.28
14	23	50	0.46
16	30	50	0.6
17	9	50	0.18
18	20	50	0.4
19	15	50	0.3
20	11	50	0.22
23	12	50	0.24
24	21	50	0.42
25	18	50	0.36
26	15	50	0.3
27	23	50	0.46
28	21	50	0.42
29	33	50	0.66
32	14	50	0.28
33	21	50	0.42
34	11	50	0.22
36	18	50	0.36
37	21	50	0.42
38	45	50	0.9
39	24	50	0.48
42	13	50	0.26
43	31	50	0.62
46	11	50	0.22
47	11	50	0.22
48	13	50	0.26
49	12	50	0.24
13	15	50	0.3
22	9	50	0.18
7	same with #3
15	same with #14
21	rejected
30	rejected
31	same with #29
35	same with #33
40	Same with #37
41	Same with #36
44	same with #43
45	same with #40, 37
EK 6-26-15 Golgi stain_P45 DHHC15+/+#2440_cortex layer V_63X_spine analysis/ Scale: 10.078 pixels/μm
Image	# of spines	segment:0-50μm from soma	spines/μm
1	rejected	50	rejected
2	20	50	0.4
3	12	50	0.24
4	15	50	0.3
5	12	50	0.24
6	17	50	0.34
7	rejected	50	rejected
8	24	50	0.48
9	27	50	0.54
10	6	50	0.12
11	31	50	0.62
12	15	50	0.3
13	16	50	0.32
14(left n.)	12	50	0.24
14(right n.)	13	50	0.26
15	9	50	0.18
17	7	50	0.14
18	20	50	0.4
19	15	50	0.3
20	9	50	0.18
21	15	50	0.3
23	12	50	0.24
24	7	50	0.14
25	13	50	0.26
26	12	50	0.24
27	13	50	0.26
28	5	50	0.1
29	9	50	0.18
31	23	50	0.46
32	27	50	0.54
16	rejected
22	rejected
30	same with #27
33	same with #28
