# Supplementary material for: Palmitoylation regulates neuropilin-2 localization and function in cortical neurons and conveys specificity to semaphorin signaling via palmitoyl acyltransferases
Source: eLife. 2023 Apr 3;12:e83217. doi: 10.7554/eLife.83217 (PMC10069869; doi:10.7554/eLife.83217)
Supplement: Figure 7—figure supplement 1—source data 2. [file elife-83217-fig7-figsupp1-data2.xlsx]

## Sheet: Sheet1
EK 12-23-15 Npn2 wt ;DHHC15 het; Thy1-GFP#2767_Cortex layer V_63X_Spine analysis									Scale: 10.078 pixels/μm
Image	spines	0-50 μm	spines/μm
1	4	50	0.08
2	2	50	0.04
3	9	50	0.18
4	22	50	0.44
5	33	50	0.66
6	16	50	0.32
7	17	50	0.34
8	11	50	0.22
9	7	50	0.14
10	8	50	0.16
11	2	50	0.04
12	3	50	0.06
13	1	50	0.02
14	0	50	0
15	4	50	0.08
16	14	50	0.28
17	5	50	0.1
18	4	50	0.08
19	6	50	0.12
20	4	50	0.08
21	2	50	0.04
EK 12-23-15 Npn2 wt;DHHC15 het;Thy1-GFP#2770_Cortex layer V_63X_Spine analysis								Scale: 10.078 pixels/μm
Image	spines	0-50 μm	spines/μm
1	1	50	0.02
2	6	50	0.12
3	7	50	0.14
4 (left)	18	50	0.36
5	1	50	0.02
6	6	50	0.12
7	18	50	0.36
8	13	50	0.26
9	2	50	0.04
10	10	50	0.2
11	11	50	0.22
12	6	50	0.12
13	1	50	0.02
14	2	50	0.04
15	11	50	0.22
16	12	50	0.24
17	8	50	0.16
18	1	50	0.02
19	0	50	0
20	7	50	0.14
4 (right)	9	50	0.18
21	11	50	0.22
22	4	50	0.08
23	2	50	0.04
24	10	50	0.2
25	3	50	0.06
26	4	50	0.08
27	5	50	0.1
28	0	50	0
29	0	50	0
30	1	50	0.02
31 (left)	5	50	0.1
32	2	50	0.04
33	7	50	0.14
34	6	50	0.12
31 (right)	2	50	0.04
EK 12-23-15 Npn2het;DHHC15wt;Thy1-GFP#2769_Cortex layer V_63X_Spine analysis								Scale: 10.078 pixels/μm
Image	spines	0-50 μm	spines/μm
1	7	50	0.14
2	16	50	0.32
3	3	50	0.06
4	13	50	0.26
5	1	50	0.02
6	7	50	0.14
7	3	50	0.06
8	12	50	0.24
9	8	50	0.16
10	1	50	0.02
11	3	50	0.06
12	0	50	0
13	4	50	0.08
14	7	50	0.14
15	9	50	0.18
16	9	50	0.18
17	3	50	0.06
18	1	50	0.02
19	6	50	0.12
20	12	50	0.24
21	2	50	0.04
22	9	50	0.18
23	0	50	0
24	7	50	0.14
EK 12-23-15 Npn2het;DHHC15wt;Thy1-GFP#2772_Cortex layer V_63X_Spine analysis								Scale: 10.078 pixels/μm
Image	spines	0-50 μm	spines/μm
1	5	50	0.1
2	5	50	0.1
3	8	50	0.16
4	28	50	0.56
5	7	50	0.14
6	17	50	0.34
7	40	50	0.8	This neuron does not look pyramidal and is omitted fron final analysis.
8	5	50	0.1
9	1	50	0.02
10	3	50	0.06
11	7	50	0.14
12	3	50	0.06
13	1	50	0.02
EK 12-23-15 Npn2 het;DHHC15 het;Thy1-GFP#2778_Cortex layer V_63X_Spine analysis								Scale: 10.078 pixels/μm
Image	spines	0-50 μm	spines/μm
1	17	50	0.34
2	10	50	0.2
3	17	50	0.34
4	4	50	0.08
5	4	50	0.08
6	9	50	0.18
7	14	50	0.28
8	8	50	0.16
9	30	50	0.6
10	4	50	0.08
11	38	50	0.76
12	14	50	0.28
13	2	50	0.04
14	3	50	0.06
15	5	50	0.1
16	4	50	0.08
17	16	50	0.32
18	23	50	0.46
19	6	50	0.12
20	4	50	0.08
21	9	50	0.18
22	17	50	0.34
23	13	50	0.26
24	2	50	0.04
25	8	50	0.16
26	7	50	0.14
27	8	50	0.16
28	6	50	0.12
29	65	50	1.3
30	1	50	0.02
31	8	50	0.16
32	7	50	0.14
33	2	50	0.04
34 (right)	6	50	0.12
EK 12-23-15 Npn2 het;DHHC15 het;Thy1-GFP#2779_Cortex layer V_63X_Spine analysis								Scale: 10.078 pixels/μm
Image	spines	0-50 μm	spines/μm
1	8	50	0.16
2	19	50	0.38
3	8	50	0.16
4	2	50	0.04
EK 12-23-15 Npn2 wt;DHHC15 het;Thy1-GFP#2767 & 2770_Cortex layer V_63X_Spine analysis									EK 12-23-15 Npn2 het;DHHC15 wt;Thy1-GFP#2769 & 2772_Cortex layer V_63X_Spine analysis									EK 12-23-15 Npn2 het;DHHC15 het;Thy1-GFP#2778 & 2779_Cortex layer V_63X_Spine analysis										T-TEST
	0.08									0.14									0.34							Npn2 het vs double het
	0.04									0.32									0.2							DHHC15 het vs double het
	0.18									0.06									0.34
	0.44									0.26									0.08
	0.66									0.02									0.08
	0.32									0.14									0.18
	0.34									0.06									0.28
	0.22									0.24									0.16
	0.14									0.16									0.6
	0.16									0.02									0.08
	0.04									0.06									0.76
	0.06									0									0.28
	0.02									0.08									0.04
	0									0.14									0.06
	0.08									0.18									0.1
	0.28									0.18									0.08
	0.1									0.06									0.32
	0.08									0.02									0.46
	0.12									0.12									0.12
	0.08									0.24									0.08
	0.04									0.04									0.18
	0.02									0.18									0.34
	0.12									0									0.26
	0.14									0.14									0.04
	0.36									0.1									0.16
	0.02									0.1									0.14
	0.12									0.16									0.16
	0.36									0.56									0.12
	0.26									0.14									1.3
	0.04									0.34									0.02
	0.2									0.02									0.16
	0.22									0.1									0.14
	0.12									0.02									0.04
	0.02									0.06									0.12
	0.04									0.14									0.16
	0.22									0.06									0.38
	0.24																		0.16
	0.16								Average	0.129444									0.04
	0.02								STDEV	0.11379
	0								SEM	0.018965								AVERAGE	0.225263
	0.14																	STDEV	0.23949
	0.18																	SEM	0.038349
	0.22
	0.08
	0.04
	0.2
	0.06
	0.08
	0.1
	0
	0
	0.02
	0.1
	0.04
	0.14
	0.12
	0.04
AVERAGE	0.135439
STDEV	0.126436
SEM	0.0167468
	Npn2 het vs double het	DHHC15 het vs double het
T-TEST	0.0154689	0.0213347
	Npn2 het	DHHC15 het	Npn2 het;DHHC15 het
AVERAGE	0.129444	0.135439	0.225263
STDEV	0.11379	0.126436	0.23949
SEM	0.018965	0.0167468	0.038349
