# Supplementary material for: Palmitoylation regulates neuropilin-2 localization and function in cortical neurons and conveys specificity to semaphorin signaling via palmitoyl acyltransferases
Source: eLife. 2023 Apr 3;12:e83217. doi: 10.7554/eLife.83217 (PMC10069869; doi:10.7554/eLife.83217)
Supplement: Figure 7—source data 1. [file elife-83217-fig7-data1.xlsx]

## Sheet: Sheet1
Spine analysis
CORTEX LAYER V	Wild-type	DHHC15-/-
	0.24	0.1
	0.18	0.14
	0.24	0.7
	0.18	0.12
	0.2	0.14
	0.48	0.06
	0.06	0.14
	0.26	0.92
	0.6	0.74
	0.04	0.24
	0.4	0.32
	0.3	0.04
	0.1	0.04
	0.1	0.12
	0.06	0.04
	0.32	0.06
	0.2	0.04
	0.04	0.14
	0.04	0.06
	0.04	0.14
	0.04	0.82
	0.58	0.08
	0.06	0.18
	0.6	0.24
	0.16	0.46
	0.04	0.96
	0.12	0.24
	0.48	0.68
	0.4	0.06
	0.14	0.08
	0.38	0.04
	0.18	0.12
	0.18	0.24
	0.12	0.08
	0.12	0.24
	0.1	0.16
	0.36	0.06
	0.06	0.38
	0.06	0.04
	1.06	0.6
	0.14	0.06
	0.48	0.04
	0.34	0.34
	0.56	0.1
	0.3	0.3
	0.22	0.2
	0.48	0.04
	0.2	0.2
	0.16	0.04
	1.2	0.04
	0.2	0.16
	0.24	0.38
	0.64	0.16
	0.26	0.16
	0.04	0.18
	0.1	0.04
	0.52	0.12
	0.18	0.38
	0.26	0.28
	0.1	0.04
	0.28	0.94
	0.3	0.46
	0.72	0.32
	0.08	0.04
	0.48	0.34
	0.26	0.32
	0.04	0.04
	0.6	0.16
	0.88	0.22
	0.64	0.64
	0.16	0.2
	0.4	0.22
	0.32	0.28
	0.08	0.58
	0.12	0.34
	0.06	0.24
	0.04	0.54
	0.12	0.52
	0.38	0.66
	0.08	0.36
	0.14	0.36
	0.08	0.68
	0.12	0.12
	0.08	0.38
	0.14	0.54
	0.14	0.68
	0.06	0.18
	0.04	0.04
	0.3	0.46
	0.04	0.16
	0.24	0.36
	0.2	0.48
	0.1	0.66
	0.2	0.5
	0.04	0.34
	0.04	0.5
	0.04	0.34
	0.06	0.16
	0.06	0.9
	0.08	0.22
	0.3	0.04
	0.08	0.04
	0.2	0.14
	0.3	0.16
	0.36	0.42
	0.08	0.06
	0.04	0.1
	0.04	0.1
	0.04	0.24
	0.16	1.36
	0.12	1.14
	0.06	0.08
	0.68	0.64
	0.18	0.3
	0.14	0.24
	0.32	0.06
	0.32	1.02
	0.34	0.16
	0.08	0.1
	0.04	0.08
	0.36	0.26
	0.46	0.22
	0.04	0.16
	0.18	0.22
	0.04	0.04
	0.06	0.22
	0.08	0.36
	0.06	0.08
	0.04	0.04
	0.38	0.1
	0.04	0.46
	0.04	0.2
	0.1	0.3
	0.02	0.06
	0.16	1.08
	0.04	0.44
	0.06	0.08
	0.02	0.04
	0.02	0.14
	0.16
	0.12
	0.3
	0.18
	0.04
	0.04
	0.1
	0.08
	0.18
	0.12
	0.08
	0.24
	0.04
	0.04
	0.4
	0.7
	0.02
	0.14
	0.16
	0.12
	0.06
	0.12
