# Supplementary material for: Palmitoylation regulates neuropilin-2 localization and function in cortical neurons and conveys specificity to semaphorin signaling via palmitoyl acyltransferases
Source: eLife. 2023 Apr 3;12:e83217. doi: 10.7554/eLife.83217 (PMC10069869; doi:10.7554/eLife.83217)
Supplement: Figure 7—source data 2. [file elife-83217-fig7-data2.xlsx]

## Sheet: Sheet1
EK 11-17-14 Golgi staining_WT BL6 layer V cortical neurons_20X: Sholl analysis
Distance from the cell body (μm)		0	10	20	30	40	50	60	70	80	90	100
	Image
	1	0	1	10	23	17	15	15	20	12	17	9
	2	0	5	7	7	6	6	7	4	4	4	2
	3	0	5	6	9	10	14	18	14	12	6	8
	4	0	2	7	7	6	8	5	6	6	2	2
	5	0	1	10	16	17	14	7	11	7	4	2
	6	0	5	7	6	3	6	3	2	1	2	6
	7	0	4	5	8	8	10	7	4	2	3	2
	8	0	1	9	8	4	1	2	4	2	1	1
	10	0	5	14	10	11	8	8	5	5	4	3
	11	0	1	10	13	9	8	12	11	10	7	3
	12(right neuron)	0	5	6	9	8	11	7	11	11	13	9
	12(left neuron)	0	7	9	10	8	8	8	10	9	8	8
	13	0	3	10	17	17	18	14	8	7	6	3
	14	0	2	9	12	14	12	10	10	7	3	2
	15	0	3	8	12	9	10	8	9	8	14	8
	16	0	3	10	11	13	4	9	8	5	4	3
	17	0	4	9	6	8	8	7	5	4	4	4
	18	0	4	10	11	10	11	10	5	5	4	2
	19	0	7	8	8	5	6	5	8	7	8	8
	20	0	1	8	8	5	6	4	3	2	2	2
	9: not analyzed
Average		0	3.45	8.6	10.55	9.4	9.2	8.3	7.9	6.3	5.8	4.35
EK 11-17-14 Golgi staining_DHHC15-/- layer V cortical neurons_20X: Sholl analysis
Distance from the cell body (μm)		0	10	20	30	40	50	60	70	80	90	100
	Image
	1	0	5	5	8	7	5	3	3	3	2	2
	2	0	1	12	9	13	13	12	9	11	8	7
	3	0	4	5	4	8	5	4	5	3	7	6
	4	0	6	12	15	14	21	14	12	8	7	8
	5	0	6	12	12	15	7	6	6	4	5	8
	7	0	1	7	14	17	23	16	18	15	16	16
	8	0	3	8	17	13	13	10	7	4	3	6
	9	0	9	10	16	8	7	4	4	7	6	1
	10	0	1	10	8	11	12	13	12	7	11	11
	11	0	6	12	20	19	19	17	17	18	17	14
	12	0	3	5	12	16	15	15	12	10	7	7
	13	0	5	5	8	13	13	6	9	7	2	4
	14	0	4	8	11	11	11	12	6	8	5	5
	15	0	1	9	10	9	12	10	5	3	3	3
	16	0	2	10	16	9	12	15	13	14	10	6
	17(right neuron)	0	5	5	8	8	8	10	5	5	6	6
	17(left neuron)	0	2	8	10	11	10	8	10	6	4	5
	18	0	5	6	10	8	6	4	5	3	4	3
	15(lower left n.)	0	3	6	8	14	15	12	16	7	4	5
	13(left most n.)	0	1	1	8	7	5	13	12	10	11	7
	Average	0	3.65	7.8	11.2	11.55	11.6	10.2	9.3	7.65	6.9	6.5
Note	neurons 19,20	not	useful
	6 (same neuron with#5?)
EK 1-6-15 Golgi stain_20x_Cer.cortex layer V_code 2
Distance from center of cell body			0	10	20	30	40	50	60	70	80	90	100	110	120	130	140	150
Scale: 3.199 pixels/μm		Image
		1	0	5	4	3	2	2	2	1	3	2	4	3	6	4	1	1
		2	0	6	11	14	9	5	3	2	3	3	6	3	5	2	3	4
		3	0	6	9	7	9	7	3	4	4	2	1	4	1	3	3	4
		4	0	10	8	7	7	9	4	4	4	6	3	5	2	7	2	7
		5	0	5	9	9	7	8	7	6	7	1	2	2	1	1	0	0
		6	0	8	12	9	8	4	4	3	2	5	4	3	2	2	1	0
		7	0	5	10	10	8	7	5	5	4	2	1	1	1	1	1	0
		8	0	1	8	12	18	11	14	11	10	8	6	6	5	4	2	3
		9	0	3	14	16	18	17	13	10	7	9	8	6	3	1	0	0
		10	0	7	14	16	9	8	7	3	2	0	0	0	0	0	0	0
		12	0	7	8	10	13	11	14	16	12	8	9	6	6	4	3	3
		13	0	8	16	12	15	12	8	7	5	3	3	1	1	1	2	2
		15	0	9	10	11	10	11	8	11	12	5	5	2	4	1	2	1
		16	0	2	11	11	14	10	6	7	5	4	2	3	2	1	3	1
		17	0	11	8	7	4	4	2	3	1	2	2	1	0	0	0	0
		18	0	9	9	12	11	14	6	7	7	2	3	2	1	0	0	0
		19	0	9	12	15	18	11	12	8	13	9	6	6	1	0	0	0
		20	0	5	9	11	7	12	6	7	6	5	3	4	4	4	4	1
		21	0	6	10	7	9	4	4	2	2	3	4	4	3	2	4	2
		22	0	2	8	12	21	24	20	16	8	3	2	2	1	1	0	0
		23	0	7	9	8	8	4	4	3	3	5	2	2	6	1	2	5
		Average	0	6.2381	9.95238	10.4286	10.7143	9.28571	7.2381	6.47619	5.71429	4.14286	3.61905	3.14286	2.61905	1.90476	1.57143	1.61905
		11																	rejected
		14																	rejected
EK 1-6-15 Golgi stain_20x_Cer.cortex layer V_code 5
Distance from center of cell body			0	10	20	30	40	50	60	70	80	90	100	110	120	130	140	150
Scale: 3.199 pixels/μm		Image
		1(left neuron)	0	5	6	5	8	3	2	2	2	1	3	2	1	2	1	2
		1(right neuron)	0	9	13	11	9	10	5	5	4	2	2	4	3	2	5	2
		3	0	9	14	11	6	5	4	6	6	2	3	2	8	6	4	2
		4	0	10	7	6	6	6	4	6	2	1	1	1	1	1	1	0
		5	0	6	9	5	5	3	4	5	6	6	2	1	0	0	0	0
		6	0	4	13	15	17	14	17	22	18	13	14	10	14	9	11	10
		7	0	6	7	6	3	1	1	2	2	6	4	1	1	2	1	1
		8	0	6	8	7	6	10	8	5	3	7	7	4	4	2	2	1
		9	0	2	12	11	12	11	9	8	4	1	2	3	2	2	1	1
		10	0	8	6	7	5	4	5	1	4	3	5	5	1	2	2	3
		11	0	5	6	3	7	1	1	1	2	2	1	1	1	6	2	5
		12	0	6	8	8	12	6	7	4	3	3	4	3	4	3	1	1
		13	0	6	8	8	7	8	4	3	3	6	6	4	4	3	5	5
		15	0	1	1	4	6	8	7	6	6	5	5	5	4	2	4	3
		16	0	1	1	7	8	8	7	5	7	5	7	4	4	5	4	4
		17	0	3	13	8	11	8	10	6	7	9	8	5	4	6	4	3
		19	0	5	9	7	6	4	2	3	3	3	4	4	3	2	4	3
		20	0	3	11	10	19	10	10	11	5	2	1	1	1	1	1	2
		21	0	7	11	10	6	7	2	2	1	2	2	4	3	3	3	3
		22	0	6	8	8	7	6	5	3	2	2	2	1	1	1	1	1
		23	0	6	8	8	7	6	8	2	3	3	2	4	2	3	3	2
		Average	0	5.42857	8.52381	7.85714	8.2381	6.61905	5.80952	5.14286	4.42857	4	4.04762	3.28571	3.14286	3	2.85714	2.57143
		2																	stack#1 r.n.
		18																	same with #17
		14
EK 6-26-15 Golgi staining P45_Cortex layer V_20X_DHHC15-/-#2438: Sholl analysis
Scale:3.199pixels/μm (1024 pixels/320.09 μm)
Image	0	10	20	30	40	50	60	70	80	90	100	110	120	130	140	150
1	0	8	9	9	7	3	3	1	1	1	1	1	0	0	0	0
2
3	0	7	8	7	5	5	2	1	1	1	2	1	1	0	0	0
4	0	6	11	8	6	6	5	3	3	1	1	1	0	0	0	0
5	0	5	6	7	7	4	2	2	2	3	2	2	2	1	0	0
6	0	8	5	5	5	4	4	4	3	5	1	2	2	2	5	1
7	0	4	3	4	4	2	1	1	1	1	1	1	1	1	1	1
8	0	6	8	5	2	2	1	1	1	2	2	2	4	3	2	2
9
10	0	6	6	3	2	2	2	2	3	2	1	1	1	1	1	1
11	0	7	6	4	2	3	3	4	4	3	3	3	2	2	2	1
12	0	5	8	3	4	2	2	3	2	3	1	5	4	2	2	3
13
14
15	0	7	10	9	7	8	5	4	9	5	4	2	2	3	3	3
16	0	10	12	7	7	5	5	7	4	4	2	5	4	1	1	1
17	0	6	7	4	2	3	2	2	1	2	4	3	1	5	2	2	beautiful n.
18	0	5	7	8	8	8	5	2	2	2	5	2	2	2	1	1
19	0	7	5	4	5	5	6	4	3	3	2	1	1	1	2	1
20
21
22	0	5	10	7	6	5	2	2	1	1	1	3	2	1	1	1
23	0	8	8	10	15	6	7	12	7	5	3	1	2	2	1	1
24	0	5	8	11	11	7	11	7	4	8	6	4	6	2	1	1
25
26	0	5	7	11	6	4	2	1	5	2	2	2	3	1	2	4
27	0	6	9	10	10	6	13	6	4	2	3	3	2	1	3	3
28	0	5	5	5	6	5	7	7	4	5	7	8	6	3	2	1
29	0	4	8	6	7	7	1	1	2	3	5	3	2	2	4	1
30	0	6	5	3	2	3	2	2	2	5	2	1	3	1	2	1
Average	0	6.13043	7.43478	6.52174	5.91304	4.56522	4.04348	3.43478	3	3	2.65217
9 rejected
13 rejected
14 rejected
21same as 19
25same as 24
2 rejected
EK 6-26-15 Golgi staining P45_Cortex layer V_20X_DHHC15+/+#2440: Sholl analysis
Scale:3.199pixels/μm (1024 pixels/320.09 μm)
Image	0	10	20	30	40	50	60	70	80	90	100	110	120	130	140	150
1	0	7	4	5	6	2	3	4	3	3	1	1	1	1	1	1
23(left n.)	0	3	5	7	6	6	8	5	4	5	7	4	3	2	2	1	2 rejected
3	0	6	8	9	6	2	1	1	1	4	1	2	2	1	1	0
4	0	6	8	5	2	2	1	1	1	1	1	3	1	1	1	1
5	0	9	9	4	2	1	3	1	2	3	2	4	2	3	3	1
6	0	2	5	2	2	1	1	1	1	2	2	2	2	3	2	2
7	0	3	10	12	14	9	9	5	7	3	1	6	1	0	0	0
8	0	2	11	19	16	10	12	9	8	3	3	2	1	0	0	0
9	0	6	9	6	8	6	4	8	9	4	2	3	2	6	2	2
10																	rejected
11	0	3	10	6	7	6	3	7	3	2	2	2	2	1	1	0
12	0	6	9	5	3	3	2	6	1	1	2	3	2	1	1	1
13	0	6	3	2	2	2	1	1	1	1	2	1	2	1	1	1
14	0	7	7	9	5	4	2	2	3	2	1	0	0	0	0	0
15	0	6	8	8	6	5	5	9	3	1	1	2	1	0	0	0
16	0	5	5	3	4	3	3	3	4	4	4	4	1	2	1	1
17	0	7	5	4	6	4	2	1	1	1	1	1	1	2	3	3
18	0	4	9	5	7	7	3	5	4	4	2	3	2	1	1	1
19																	same with 16
20																	same with 15
21	0	6	10	9	4	8	5	5	5	6	6	3	2	5	4	2
22	0	8	14	10	6	4	1	1	2	1	1	1	1	4	5	2
23(right n.)	0	7	9	10	9	8	7	5	6	3	3	2	1	0	0	0
24																	same with 21
25	0	3	10	13	14	11	12	8	8	9	11	7	3	2	2	2
26	0	7	4	9	10	8	4	3	3	2	2	4	1	3	1	1
27
28	0	8	5	5	7	7	4	2	3	3	3	1	3	1	2	2
29																	same with 28
30																	30 rejected
31	0	6	5	5	4	1	1	3	2	1	2	2	1	1	2	1
32	0	11	7	7	3	4	6	2	3	3	2	3	6	9	2	2
33	0	2	5	10	7	9	10	8	8	7	7	8	4	4	4	2
34	0	6	9	6	7	8	9	7	8	10	8	3	4	4	1	1
35	0	5	12	10	6	4	2	3	1	2	4	4	2	3	1	1
36	0	6	9	7	6	2	5	3	2	1	1	1	1	1	1	1
37	0	4	7	4	3	3	3	2	2	1	1	1	1	1	1	1
38	0	3	1	3	2	2	3	4	2	2	8	4	1	1	5	2
39																	same with 36
40																	same with 35
